# Supplementary material
Source: publisher figshare collection journal article supplement (https://gsajournals.figshare.com/articles/dataset/_/9621263)
Supplement: Supplementary file 1 [file 3]

## Sheet: Mutant Up p≤0.05
Supplementary Table 1. List of genes from RNA-seq that display differential expression between dMPC1 mutant intestines and intestines from matched controls, or intestines from myo1A>dMPC1-RNAi animals, meeting a cutoff p-value of <0.05 (dMPC1 mutant data) or <0.001 (myo1A>dMPC1-RNAi data).
Gene	Associated Gene Name	Gene type	Description	baseMean	log2FoldChange	padj	Transformed Padj	TransHet_MPC_1	TransHet_MPC_2	PreciseControl_2
FBgn0034253	CG10936	protein_coding		173.752	5.66284	2.15705e-36	35.6661	655.81	1156.43	4.30399
FBgn0015316	Try29F	protein_coding	Trypsin 29F [Source:FlyBase gene name;Acc:FBgn0015316]	359.47	3.34889	9.09451e-19	18.0412	378.924	506.368	21.5199
FBgn0004430	LysS	protein_coding	Lysozyme S [Source:FlyBase gene name;Acc:FBgn0004430]	2080.87	3.32362	7.23541e-28	27.1405	3920.51	5277.52	373.371
FBgn0262357	CG43055	protein_coding		1710.54	3.20997	1.02686e-26	25.9885	4016.17	3667.75	319.571
FBgn0040031	CG12061	protein_coding		16.1511	2.98522	4.30056e-09	8.36648	140.834	32.5033	3.22799
FBgn0025837	CG17636	protein_coding		402.698	2.87871	7.88596e-33	32.1031	907.717	1094.85	119.436
FBgn0025620	CG13360	protein_coding		678.275	2.50501	2.41295e-24	23.6175	1167.06	1609.77	216.275
FBgn0031432	Cyp309a1	protein_coding	Cyp309a1 [Source:FlyBase gene name;Acc:FBgn0031432]	1235.44	2.48281	2.27633e-14	13.6428	1324.37	1334.35	185.072
FBgn0010385	Def	protein_coding	Defensin [Source:FlyBase gene name;Acc:FBgn0010385]	62.9792	2.27604	1.10199e-07	6.95782	243.936	195.02	36.5839
FBgn0003227	rec	protein_coding	recombination-defective [Source:FlyBase gene name;Acc:FBgn0003227]	27.8856	2.2711	1.02722e-05	4.98833	85.032	90.6672	10.76
FBgn0264272	mwh	protein_coding	multiple wing hairs [Source:FlyBase gene name;Acc:FBgn0264272]	1550.34	2.26758	1.67494e-16	15.776	2681.7	2588.29	499.263
FBgn0038435	Gyc-89Da	protein_coding	Guanylyl cyclase at 89Da [Source:FlyBase gene name;Acc:FBgn0038435]	8.77352	2.26497	2.93658e-05	4.53216	37.2015	51.3211	4.30399
FBgn0033592	CG13215	protein_coding		135.228	2.23023	1.50758e-06	5.82172	274.228	311.348	40.8879
FBgn0031602	CG15431	protein_coding		333.125	2.15929	1.63981e-10	9.78521	378.393	321.612	59.1799
FBgn0030593	CG9512	protein_coding		2542.42	2.15257	3.05661e-10	9.51476	4583.23	6295.38	1010.36
FBgn0033296	Mal-A7	protein_coding	Maltase A7 [Source:FlyBase gene name;Acc:FBgn0033296]	4475.09	2.1066	0.000294358	3.53112	12073	15974.5	699.398
FBgn0004426	LysC	protein_coding	Lysozyme C [Source:FlyBase gene name;Acc:FBgn0004426]	1976.72	2.09607	0.000158653	3.79955	2878.33	3375.22	154.944
FBgn0035968	Slc45-1	protein_coding	Slc45 ortholog 1 [Source:FlyBase gene name;Acc:FBgn0035968]	362.436	2.085	5.04075e-09	8.29751	544.205	822.848	129.12
FBgn0260746	Ect3	protein_coding	Ectoderm-expressed 3 [Source:FlyBase gene name;Acc:FBgn0260746]	38.4961	2.04639	0.000113944	3.94331	85.5635	118.038	15.064
FBgn0036091	CG18628	protein_coding		9.10549	2.02947	0.00038137	3.41865	26.5725	39.3462	2.15199
FBgn0264984	CR44135	lincRNA		16.9523	1.99797	0.000298199	3.52549	44.6418	56.4532	6.45598
FBgn0039856	CG1774	protein_coding		900.225	1.97998	5.76578e-20	19.2391	1684.17	2401.83	486.351
FBgn0036294	CG10654	protein_coding		31.1464	1.95302	9.10656e-05	4.04065	67.4942	82.1137	12.912
FBgn0085404	CG34375	protein_coding		15.3261	1.89128	0.00113841	2.9437	41.9846	30.7926	3.22799
FBgn0036997	CG5955	protein_coding		9.09866	1.83725	0.00182153	2.73956	29.7612	17.107	1.076
FBgn0038790	MtnC	protein_coding	Metallothionein C [Source:FlyBase gene name;Acc:FBgn0038790]	3551.82	1.83083	7.5503e-08	7.12204	6448.09	9424.26	1949.71
FBgn0001089	Gal	protein_coding	beta galactosidase [Source:FlyBase gene name;Acc:FBgn0001089]	2443.13	1.80614	7.54753e-09	8.1222	2131.12	2713.17	583.191
FBgn0038799	CG4288	protein_coding		203.666	1.79999	6.74855e-07	6.17079	175.91	283.977	51.6479
FBgn0039452	CG14245	protein_coding		2003.58	1.76207	0.00217937	2.66167	4416.35	6144.84	908.142
FBgn0264704	CR43973	lincRNA		24.5699	1.73558	0.00254239	2.59476	86.0949	61.5853	15.064
FBgn0037724	Fst	protein_coding	Frost [Source:FlyBase gene name;Acc:FBgn0037724]	2147.22	1.69712	0.000898214	3.04662	2962.3	3989.36	681.106
FBgn0034664	CG4377	protein_coding		3663.64	1.68519	3.65745e-07	6.43682	7478.57	7610.91	2089.59
FBgn0022355	Tsf1	protein_coding	Transferrin 1 [Source:FlyBase gene name;Acc:FBgn0022355]	237.229	1.66441	0.000479861	3.31888	386.896	605.589	118.36
FBgn0026563	CG1979	protein_coding		34.1501	1.65945	0.00352956	2.45228	106.29	123.171	29.0519
FBgn0040717	Nplp4	protein_coding	Neuropeptide-like precursor 4 [Source:FlyBase gene name;Acc:FBgn0040717]	11.7993	1.63965	0.00874118	2.05843	51.5507	41.0569	9.68398
FBgn0039611	CG14528	protein_coding		37.1427	1.60955	0.00393266	2.40531	62.1797	99.2207	17.216
FBgn0036768	CG7402	protein_coding		110.461	1.6053	1.59722e-05	4.79664	142.429	215.548	48.4199
FBgn0035661	CG10477	protein_coding		7514.92	1.60489	9.05303e-27	26.0432	11919.9	12353	3891.88
FBgn0037974	CG12224	protein_coding		220.443	1.60301	0.000903569	3.04404	411.874	793.766	171.084
FBgn0032381	Mal-B1	protein_coding	Maltase B1 [Source:FlyBase gene name;Acc:FBgn0032381]	353.611	1.60058	0.0120056	1.92062	1077.78	138.567	24.7479
FBgn0002570	Mal-A1	protein_coding	Maltase A1 [Source:FlyBase gene name;Acc:FBgn0002570]	32826.8	1.57371	0.0043069	2.36584	72454.7	74833	17435.5
FBgn0033297	Mal-A8	protein_coding	Maltase A8 [Source:FlyBase gene name;Acc:FBgn0033297]	4579.09	1.57346	0.0141895	1.84803	10309.1	11316.3	1221.26
FBgn0030999	Mur18B	protein_coding	Mucin related 18B [Source:FlyBase gene name;Acc:FBgn0030999]	36534.9	1.56984	5.181e-14	13.2856	59739.8	81633	22841.3
FBgn0259244	CG42342	protein_coding		47.8114	1.56591	0.000582674	3.23457	102.038	121.46	31.2039
FBgn0030271	CG15202	protein_coding		59.271	1.56561	0.00963524	2.01614	106.822	112.906	21.5199
FBgn0037386	CG1208	protein_coding		488.226	1.55475	0.0131505	1.88106	1136.24	1253.94	216.275
FBgn0050360	Mal-A6	protein_coding	Maltase A6 [Source:FlyBase gene name;Acc:FBgn0050360]	10761.9	1.55175	0.014307	1.84445	29753.8	29785	5689.87
FBgn0036324	CG12520	protein_coding		16.4062	1.54417	0.0096698	2.01458	46.2362	42.7676	10.76
FBgn0034663	CG4363	protein_coding		2770.68	1.51561	0.00557838	2.25349	5687.05	5463.98	1388.04
FBgn0000489	Pka-C3	protein_coding	cAMP-dependent protein kinase 3 [Source:FlyBase gene name;Acc:FBgn0000489]	399.46	1.51295	3.0828e-06	5.51105	844.474	946.018	288.367
FBgn0000079	Amy-p	protein_coding	Amylase proximal [Source:FlyBase gene name;Acc:FBgn0000079]	27235.9	1.50402	5.57891e-08	7.25345	33277.8	47210.2	13063.7
FBgn0039092	CG16723	protein_coding		142.95	1.48769	0.000523276	3.28127	156.246	321.612	68.8638
FBgn0050371	CG30371	protein_coding		405.055	1.47787	0.000472034	3.32603	503.283	467.022	138.804
FBgn0040253	Ugt86Dg	protein_coding	Ugt86Dg [Source:FlyBase gene name;Acc:FBgn0040253]	92.8186	1.4747	3.86739e-05	4.41258	174.847	172.781	55.9519
FBgn0052580	Muc14A	protein_coding	Mucin 14A [Source:FlyBase gene name;Acc:FBgn0052580]	41.2388	1.47163	0.0132179	1.87884	82.9062	119.749	25.8239
FBgn0015777	nrv2	protein_coding	nervana 2 [Source:FlyBase gene name;Acc:FBgn0015777]	227.173	1.45441	2.1844e-05	4.66067	587.784	692.834	219.503
FBgn0266629	CR45136	lincRNA		17.5954	1.45344	0.0192803	1.71489	32.4185	35.9247	6.45598
FBgn0002564	Lsp1gamma	protein_coding	Larval serum protein 1 gamma [Source:FlyBase gene name;Acc:FBgn0002564]	48.4945	1.44304	0.00619281	2.20811	49.4249	53.0318	11.836
FBgn0002565	Lsp2	protein_coding	Larval serum protein 2 [Source:FlyBase gene name;Acc:FBgn0002565]	39.3045	1.43478	0.0286199	1.54333	56.8652	82.1137	8.60798
FBgn0034045	CG8249	protein_coding		478.215	1.42957	1.83824e-11	10.7356	534.108	634.671	204.44
FBgn0263934	esn	protein_coding	espinas [Source:FlyBase gene name;Acc:FBgn0263934]	29.4954	1.42507	0.00746042	2.12724	59.5224	53.0318	16.14
FBgn0039593	CG9989	protein_coding		55.4348	1.40643	0.00772361	2.11218	74.403	94.0886	22.5959
FBgn0033644	Tret1-2	protein_coding	Trehalose transporter 1-2 [Source:FlyBase gene name;Acc:FBgn0033644]	27.0712	1.37927	0.0293082	1.53301	21.7895	22.2391	1.076
FBgn0266626	CR45133	lincRNA		195.308	1.36243	0.00011616	3.93494	279.543	405.436	119.436
FBgn0038498	beat-IIa	protein_coding	beaten path IIa [Source:FlyBase gene name;Acc:FBgn0038498]	16.128	1.3594	0.0402742	1.39497	39.3273	37.6354	8.60798
FBgn0026592	Fie	protein_coding	Fire exit [Source:FlyBase gene name;Acc:FBgn0026592]	74.6082	1.35907	0.00505486	2.29629	162.624	109.485	44.1159
FBgn0031000	Muc18B	protein_coding	Mucin 18B [Source:FlyBase gene name;Acc:FBgn0031000]	33.7416	1.34989	0.0401073	1.39678	39.8588	73.5602	10.76
FBgn0035160	hng3	protein_coding	hinge3 [Source:FlyBase gene name;Acc:FBgn0035160]	53.1736	1.34404	0.00266021	2.57508	138.709	141.988	50.5719
FBgn0266405	CR45045	lincRNA		18.2936	1.33852	0.0479149	1.31953	45.1733	25.6605	7.53198
FBgn0027843	CAH2	protein_coding	Carbonic anhydrase 2 [Source:FlyBase gene name;Acc:FBgn0027843]	3043.41	1.33349	1.05556e-08	7.97652	5135.94	7065.2	2330.61
FBgn0033188	Drat	protein_coding	Death resistor Adh domain containing target [Source:FlyBase gene name;Acc:FBgn0033188]	2690.07	1.33199	6.30834e-10	9.20008	5127.43	6942.03	2327.38
FBgn0028540	CG9008	protein_coding		588.109	1.31359	2.8788e-11	10.5408	1521.01	1647.41	626.23
FBgn0030270	CG15199	protein_coding		1084.2	1.31259	0.0383396	1.41635	1529.51	1269.34	384.131
FBgn0034480	CG16898	protein_coding		1594.02	1.31115	3.11479e-10	9.50657	2873.02	3400.88	1227.71
FBgn0051106	CG31106	protein_coding		2175.51	1.30425	2.7991e-05	4.55298	5275.71	7164.42	2425.3
FBgn0035977	PGRP-LF	protein_coding	Peptidoglycan recognition protein LF [Source:FlyBase gene name;Acc:FBgn0035977]	155.223	1.28172	3.21518e-05	4.4928	283.794	244.63	102.22
FBgn0051704	CG31704	protein_coding		654.055	1.27934	0.000376304	3.42446	615.951	644.935	229.187
FBgn0030881	CG12985	protein_coding		36.158	1.271	0.0255206	1.59311	39.8588	44.4783	10.76
FBgn0039864	CG11550	protein_coding		71.2733	1.26177	0.00203581	2.69126	161.029	124.881	54.8759
FBgn0033395	Cyp4p2	protein_coding	Cyp4p2 [Source:FlyBase gene name;Acc:FBgn0033395]	694.444	1.24311	2.50853e-12	11.6006	732.87	781.791	308.811
FBgn0037683	CG18473	protein_coding		465.999	1.24292	0.00036058	3.443	560.149	773.237	253.935
FBgn0265498	CR44367	lincRNA		19.8149	1.23723	0.0491203	1.30874	32.9499	41.0569	10.76
FBgn0011660	Pms2	protein_coding	Pms2 [Source:FlyBase gene name;Acc:FBgn0011660]	40.8884	1.22757	0.0217048	1.66344	45.1733	46.189	13.988
FBgn0259219	CG42319	protein_coding		28.2663	1.22462	0.0333666	1.47669	86.0949	65.0067	29.0519
FBgn0002569	Mal-A2	protein_coding	Maltase A2 [Source:FlyBase gene name;Acc:FBgn0002569]	4010.2	1.22435	2.09088e-05	4.67967	6214.25	6351.84	2531.82
FBgn0031907	CG5171	protein_coding		524.715	1.2144	1.59119e-06	5.79828	1018.26	1505.42	526.163
FBgn0036279	Ncc69	protein_coding	sodium chloride cotransporter 69 [Source:FlyBase gene name;Acc:FBgn0036279]	1240.45	1.21422	1.47913e-11	10.83	1226.59	1279.61	521.859
FBgn0040718	CG15353	protein_coding		67.5179	1.21103	0.0071538	2.14546	212.049	295.951	110.828
FBgn0034999	CG3394	protein_coding		1029.27	1.20864	0.0037153	2.43001	1042.17	1236.84	422.867
FBgn0035264	Oseg4	protein_coding	Outer segment 4 [Source:FlyBase gene name;Acc:FBgn0035264]	451.529	1.20365	0.00112096	2.95041	207.266	203.574	73.1678
FBgn0037150	CG7133	protein_coding		194.948	1.19306	5.06453e-05	4.29546	239.153	232.655	95.7638
FBgn0001226	Hsp27	protein_coding	Heat shock protein 27 [Source:FlyBase gene name;Acc:FBgn0001226]	158.202	1.19219	0.0119474	1.92273	206.734	102.642	58.1039
FBgn0263002	CR43310	pseudogene		110.174	1.18088	0.0122201	1.91292	302.395	352.405	137.728
FBgn0267242	CR45682	lincRNA		64.0244	1.17738	0.0107528	1.96848	105.227	85.5351	36.5839
FBgn0036927	CG7433	protein_coding		1075.66	1.16458	0.00459416	2.33779	2325.09	3012.55	1137.33
FBgn0032753	CG17572	protein_coding		32.106	1.16424	0.0476802	1.32166	42.516	51.3211	15.064
FBgn0011770	Gip	protein_coding	GIP-like [Source:FlyBase gene name;Acc:FBgn0011770]	1221.73	1.16311	9.69424e-05	4.01349	2531.3	3262.31	1247.08
FBgn0063491	GstE9	protein_coding	Glutathione S transferase E9 [Source:FlyBase gene name;Acc:FBgn0063491]	963.266	1.1627	7.599e-05	4.11924	1265.38	1606.35	602.559
FBgn0032945	CG8665	protein_coding		409.059	1.15626	0.00217937	2.66167	741.373	865.615	334.635
FBgn0041712	yellow-d	protein_coding	yellow-d [Source:FlyBase gene name;Acc:FBgn0041712]	666.847	1.15482	0.00557223	2.25397	814.182	838.244	323.875
FBgn0030737	CG9914	protein_coding		3581.34	1.14701	0.00490492	2.30937	8081.76	10526	3983.34
FBgn0041194	Prat2	protein_coding	Phosphoribosylamidotransferase 2 [Source:FlyBase gene name;Acc:FBgn0041194]	81.4404	1.14115	0.0481648	1.31727	114.793	193.309	57.0279
FBgn0032036	CG13384	protein_coding		581.781	1.13219	3.6667e-07	6.43572	917.283	1224.86	472.363
FBgn0035849	ERR	protein_coding	estrogen-related receptor [Source:FlyBase gene name;Acc:FBgn0035849]	638.688	1.13217	1.70534e-06	5.76819	1034.2	1199.2	491.731
FBgn0039152	Rootletin	protein_coding	Rootletin [Source:FlyBase gene name;Acc:FBgn0039152]	108.538	1.1249	0.00978566	2.00941	382.644	340.43	165.704
FBgn0039633	CG11873	protein_coding		675.857	1.12468	2.6805e-08	7.57178	1179.82	1238.55	541.227
FBgn0085232	CG34203	protein_coding		558.1	1.1229	0.00393266	2.40531	755.191	660.331	296.975
FBgn0039453	CG6403	protein_coding		148.958	1.11863	0.0199723	1.69957	89.2836	106.064	33.3559
FBgn0026061	Mipp1	protein_coding	Multiple inositol polyphosphate phosphatase 1 [Source:FlyBase gene name;Acc:FBgn0026061]	2704.86	1.11857	1.3193e-13	12.8797	3692.52	4233.99	1792.61
FBgn0037727	CG8358	protein_coding		151.647	1.10321	0.0368092	1.43404	244.999	364.38	123.74
FBgn0004240	Dpt	protein_coding	Diptericin [Source:FlyBase gene name;Acc:FBgn0004240]	103.859	1.10262	0.0419693	1.37707	816.308	30.7926	44.1159
FBgn0038595	CG7142	protein_coding		356.967	1.09906	5.97002e-05	4.22402	439.509	425.965	191.528
FBgn0063494	GstE6	protein_coding	Glutathione S transferase E6 [Source:FlyBase gene name;Acc:FBgn0063494]	1904.87	1.08203	3.45748e-08	7.46124	2829.97	3267.44	1406.33
FBgn0040350	CG3690	protein_coding		2059.32	1.07882	0.00548192	2.26107	3107.92	4651.4	1714.06
FBgn0015351	CG14906	protein_coding		170.542	1.06364	0.0014965	2.82492	230.649	213.838	100.068
FBgn0037788	CG3940	protein_coding		889.973	1.05705	2.40235e-09	8.61936	1270.17	1164.99	574.583
FBgn0004552	Akh	protein_coding	Adipokinetic hormone [Source:FlyBase gene name;Acc:FBgn0004552]	254.218	1.05577	0.022651	1.64491	195.042	205.284	78.5478
FBgn0266810	CR45272	lincRNA		181.723	1.05563	0.00974525	2.01121	189.196	261.737	95.7638
FBgn0039313	CG11892	protein_coding		8942.16	1.04858	4.28542e-05	4.36801	15191.5	22969.6	9010.4
FBgn0053978	CG33978	protein_coding		65.7959	1.04574	0.044556	1.35109	93.0038	90.6672	37.6599
FBgn0026314	Ugt35b	protein_coding	UDP-glycosyltransferase 35b [Source:FlyBase gene name;Acc:FBgn0026314]	1111.49	1.03629	0.00493622	2.30661	892.305	1491.73	526.163
FBgn0085279	CG34250	protein_coding		54.6412	1.03484	0.033887	1.46997	65.8998	75.2709	29.0519
FBgn0015037	Cyp4p1	protein_coding	Cytochrome P450-4p1 [Source:FlyBase gene name;Acc:FBgn0015037]	1465.91	1.02914	7.2707e-11	10.1384	1309.49	1271.05	619.775
FBgn0038147	CCHa2	protein_coding	CCHamide-2 [Source:FlyBase gene name;Acc:FBgn0038147]	847.851	1.01777	0.00088551	3.05281	990.092	1508.84	584.267
FBgn0036835	CG14075	protein_coding		240.811	1.0147	0.0106712	1.97179	172.721	179.624	75.3198
FBgn0002719	Men	protein_coding	Malic enzyme [Source:FlyBase gene name;Acc:FBgn0002719]	3914.57	1.00653	0.000882809	3.05413	7632.16	9776.66	4211.45
FBgn0029937	CG8300	protein_coding		214.509	0.999947	0.00201811	2.69506	288.046	390.04	159.248
FBgn0050496	CG30496	protein_coding		96.2773	0.997372	0.0164603	1.78356	131.8	136.856	61.3319
FBgn0035237	CG13917	protein_coding		852.625	0.997083	2.61595e-06	5.58237	1405.15	1578.98	730.602
FBgn0034443	cer	protein_coding	crammer [Source:FlyBase gene name;Acc:FBgn0034443]	230.678	0.9775	0.000205929	3.68628	318.339	381.487	170.008
FBgn0032820	fbp	protein_coding	fructose-1,6-bisphosphatase [Source:FlyBase gene name;Acc:FBgn0032820]	557.389	0.97142	0.00530839	2.27504	1060.24	1344.61	591.799
FBgn0037883	CG14701	protein_coding		69.6126	0.971224	0.0473785	1.32442	87.6893	100.931	41.9639
FBgn0003748	Treh	protein_coding	Trehalase [Source:FlyBase gene name;Acc:FBgn0003748]	8172.66	0.968552	2.7991e-05	4.55298	7577.42	7214.03	3636.87
FBgn0003714	tko	protein_coding	technical knockout [Source:FlyBase gene name;Acc:FBgn0003714]	366.72	0.965963	1.19082e-05	4.92416	389.553	379.776	190.452
FBgn0033873	CG6337	protein_coding		1017.49	0.957808	0.00911423	2.04028	1281.33	1221.44	598.255
FBgn0031498	CG17260	protein_coding		138.208	0.956814	0.0217031	1.66348	161.561	184.756	80.6998
FBgn0039068	CG13827	protein_coding		266.317	0.954278	0.00214061	2.66946	522.947	694.545	305.583
FBgn0037845	CG14694	protein_coding		373.214	0.953836	0.0372292	1.42912	381.05	588.482	223.807
FBgn0024995	CG2680	protein_coding		1535.49	0.950986	0.00191715	2.71734	2873.55	4192.93	1785.08
FBgn0037354	CG12171	protein_coding		1735.72	0.944121	3.94704e-05	4.40373	2950.61	3662.61	1683.94
FBgn0050272	CG30272	protein_coding		1144.48	0.94098	0.0227326	1.64335	1492.84	1712.41	773.642
FBgn0034299	CG5757	protein_coding		102.196	0.940313	0.00888443	2.05137	134.988	148.831	68.8638
FBgn0034197	Cda9	protein_coding	Chitin deacetylase-like 9 [Source:FlyBase gene name;Acc:FBgn0034197]	247.189	0.935612	0.00262569	2.58076	414	338.719	192.604
FBgn0004629	Cys	protein_coding	Cystatin-like [Source:FlyBase gene name;Acc:FBgn0004629]	1097.55	0.927327	3.13429e-06	5.50386	1586.38	1840.72	882.318
FBgn0035678	CG10469	protein_coding		150.287	0.926986	0.0213821	1.66995	213.643	265.159	117.284
FBgn0039840	CG11340	protein_coding		1416.52	0.924099	3.25052e-05	4.48805	1574.69	1955.33	902.762
FBgn0038465	Irc	protein_coding	Immune-regulated catalase [Source:FlyBase gene name;Acc:FBgn0038465]	342.933	0.92355	0.00660764	2.17995	460.236	496.104	238.871
FBgn0039827	CG1544	protein_coding		258.835	0.923085	0.0156471	1.80557	374.672	460.179	207.667
FBgn0061356	CG18003	protein_coding		787.673	0.921062	0.00052866	3.27682	1071.94	1361.72	620.851
FBgn0039315	CG13658	protein_coding		466.722	0.921056	9.19564e-07	6.03642	840.223	891.276	450.843
FBgn0052068	CG32068	protein_coding		1597.29	0.920708	1.14646e-07	6.94064	2321.37	2815.82	1334.24
FBgn0010531	Ccs	protein_coding	Copper chaperone for superoxide dismutase [Source:FlyBase gene name;Acc:FBgn0010531]	330.915	0.918831	0.0270547	1.56776	391.679	468.732	208.743
FBgn0263235	Phae2	protein_coding	Phaedra 2 [Source:FlyBase gene name;Acc:FBgn0263235]	3283.39	0.913946	0.000972688	3.01203	6679.8	6714.51	3480.85
FBgn0035360	CG1246	protein_coding		6302.88	0.913481	8.84064e-06	5.05352	9139.35	9306.22	4802.18
FBgn0039311	CG10513	protein_coding		3415.42	0.911723	0.0070006	2.15486	4644.88	6762.41	2929.94
FBgn0032161	CG4594	protein_coding		172.791	0.900561	0.0142452	1.84633	122.765	153.963	65.6358
FBgn0034451	TBCB	protein_coding	tubulin-binding cofactor B [Source:FlyBase gene name;Acc:FBgn0034451]	222.957	0.894591	0.00595493	2.22512	399.119	316.48	187.224
FBgn0035189	CG9119	protein_coding		2526.56	0.89402	7.48345e-05	4.1259	5547.81	7508.27	3491.61
FBgn0014342	mia	protein_coding	meiosis I arrest [Source:FlyBase gene name;Acc:FBgn0014342]	170.678	0.891737	0.0286239	1.54327	266.257	306.216	145.26
FBgn0086370	sra	protein_coding	sarah [Source:FlyBase gene name;Acc:FBgn0086370]	631.684	0.890962	5.26256e-06	5.2788	834.908	870.747	450.843
FBgn0037063	CG9391	protein_coding		1098.1	0.880603	4.44969e-06	5.35167	1713.4	2199.96	1044.79
FBgn0036563	CG13075	protein_coding		139.039	0.874136	0.0305522	1.51496	218.426	248.052	120.512
FBgn0063492	GstE8	protein_coding	Glutathione S transferase E8 [Source:FlyBase gene name;Acc:FBgn0063492]	407.997	0.871732	0.00411614	2.38551	733.933	894.697	433.627
FBgn0015010	Ag5r	protein_coding	Antigen 5-related [Source:FlyBase gene name;Acc:FBgn0015010]	6112.04	0.870383	0.038939	1.40962	7699.65	6914.66	3678.84
FBgn0039809	CG15547	protein_coding		110.786	0.863964	0.0362028	1.44126	165.812	179.624	89.3078
FBgn0085427	CG34398	protein_coding		231.265	0.862772	0.0125152	1.90256	313.024	333.587	168.932
FBgn0039525	CG5646	protein_coding		430.561	0.859749	0.0198257	1.70277	215.237	270.291	119.436
FBgn0039474	CG6283	protein_coding		2236.61	0.857063	0.011035	1.95723	679.193	745.866	351.851
FBgn0051997	CG31997	protein_coding		286.937	0.8558	0.00057447	3.24073	398.056	415.701	218.427
FBgn0053099	CG33099	protein_coding		566.614	0.85042	0.00447366	2.34934	795.05	1084.59	503.567
FBgn0039787	CG9702	protein_coding		1507.41	0.848054	0.0225478	1.6469	2660.97	3337.58	1615.07
FBgn0051272	CG31272	protein_coding		3883.93	0.847426	0.0138331	1.85908	5531.33	8765.64	3850.99
FBgn0051549	CG31549	protein_coding		411.325	0.843799	0.000186869	3.72846	668.033	783.502	395.967
FBgn0041588	ligatin	protein_coding	ligatin [Source:FlyBase gene name;Acc:FBgn0041588]	456.493	0.843142	0.000537483	3.26964	413.468	455.047	232.415
FBgn0029867	CG3847	protein_coding		525.005	0.839888	0.0140379	1.8527	785.483	732.181	406.727
FBgn0033524	Cyp49a1	protein_coding	Cyp49a1 [Source:FlyBase gene name;Acc:FBgn0033524]	371.449	0.839706	0.00509012	2.29327	515.507	485.839	271.151
FBgn0034335	GstE1	protein_coding	Glutathione S transferase E1 [Source:FlyBase gene name;Acc:FBgn0034335]	984.331	0.832615	0.000129977	3.88613	1812.25	1561.87	940.422
FBgn0015038	Cyp9b1	protein_coding	Cytochrome P450-9b1 [Source:FlyBase gene name;Acc:FBgn0015038]	333.882	0.827438	0.0277846	1.5562	467.676	468.732	250.707
FBgn0040491	Buffy	protein_coding	Buffy [Source:FlyBase gene name;Acc:FBgn0040491]	218.202	0.827041	0.031669	1.49937	303.99	292.53	159.248
FBgn0038658	CG14292	protein_coding		12782.8	0.826778	0.000675309	3.1705	22410.7	29566.1	14459.3
FBgn0013771	Cyp6a9	protein_coding	Cytochrome P450-6a9 [Source:FlyBase gene name;Acc:FBgn0013771]	894.833	0.826592	0.029941	1.52373	984.246	1312.11	610.091
FBgn0002641	mal	protein_coding	maroon-like [Source:FlyBase gene name;Acc:FBgn0002641]	657.856	0.824541	0.000777131	3.10951	1013.48	1110.25	587.495
FBgn0034883	CG17664	protein_coding		1334.82	0.822211	0.00703205	2.15292	1866.98	1975.86	1050.17
FBgn0052195	CG32195	protein_coding		789.638	0.81409	0.00152925	2.81552	1311.62	1681.62	834.974
FBgn0040363	CG11384	protein_coding		168.429	0.814073	0.0323615	1.48997	248.187	266.87	139.88
FBgn0032022	CG14275	protein_coding		362.023	0.81319	0.00284745	2.54554	359.26	441.361	217.351
FBgn0051370	CG31370	protein_coding		295.302	0.804391	0.00172367	2.76355	428.349	467.022	249.631
FBgn0033883	CG16935	protein_coding		824.169	0.795069	8.98426e-07	6.04652	1217.55	1255.66	704.778
FBgn0032400	CG6770	protein_coding		8301.94	0.793941	0.0222522	1.65263	8885.85	10252.2	5247.64
FBgn0029092	ced-6	protein_coding	ced-6 [Source:FlyBase gene name;Acc:FBgn0029092]	571.515	0.7819	0.0242522	1.61525	757.848	993.918	489.579
FBgn0051713	Apf	protein_coding	diadenosine tetraphosphate hydrolase [Source:FlyBase gene name;Acc:FBgn0051713]	181.876	0.770705	0.0267387	1.57286	211.517	241.209	125.892
FBgn0265052	St3	protein_coding	Sulfotransferase 3 [Source:FlyBase gene name;Acc:FBgn0265052]	945.725	0.766562	2.71494e-05	4.56624	939.073	1127.35	592.875
FBgn0015571	alpha-Est3	protein_coding	alpha-Esterase-3 [Source:FlyBase gene name;Acc:FBgn0015571]	1581.18	0.76117	0.000683279	3.1654	1820.22	2369.32	1208.35
FBgn0030968	CG7322	protein_coding		715.62	0.758378	0.0046355	2.3339	944.919	1245.39	630.534
FBgn0051104	CG31104	protein_coding		1240.56	0.755951	0.00694429	2.15837	1277.61	1608.06	826.366
FBgn0261976	Psf2	protein_coding	Psf2 [Source:FlyBase gene name;Acc:FBgn0261976]	194.757	0.75571	0.0478973	1.31969	307.178	441.361	214.123
FBgn0032793	CG10189	protein_coding		143.884	0.75223	0.0362669	1.44049	142.429	128.303	76.3958
FBgn0267408	AOX1	protein_coding	Aldehyde oxidase 1 [Source:FlyBase gene name;Acc:FBgn0267408]	29370.1	0.747701	0.0115452	1.9376	21642.2	27337	14002
FBgn0033788	CG13323	protein_coding		16454.6	0.74751	3.26227e-06	5.48648	16434.6	14828.4	9185.79
FBgn0027791	O-fut2	protein_coding	O-fucosyltransferase 2 [Source:FlyBase gene name;Acc:FBgn0027791]	212.085	0.746484	0.0364949	1.43777	173.784	206.995	105.448
FBgn0016684	NaPi-T	protein_coding	Na[+]-dependent inorganic phosphate cotransporter [Source:FlyBase gene name;Acc:FBgn0016684]	3618.88	0.74317	0.0140379	1.8527	5715.75	7681.05	3929.54
FBgn0032908	CG9270	protein_coding		432.746	0.740755	0.0184775	1.73336	428.349	579.928	288.367
FBgn0024945	NitFhit	protein_coding	Nitrilase and fragile histidine triad fusion protein [Source:FlyBase gene name;Acc:FBgn0024945]	324.513	0.740075	0.00579828	2.2367	459.704	571.375	300.203
FBgn0036290	CG10638	protein_coding		535.77	0.738916	0.000500153	3.3009	741.373	790.344	451.919
FBgn0016715	Reg-2	protein_coding	Rhythmically expressed gene 2 [Source:FlyBase gene name;Acc:FBgn0016715]	425.859	0.738098	0.0102418	1.98962	489.466	443.072	271.151
FBgn0038179	CG9312	protein_coding		462.974	0.735078	0.0114555	1.94099	551.114	650.067	349.699
FBgn0037236	Skp2	protein_coding		166.15	0.734944	0.0211438	1.67482	215.769	191.599	119.436
FBgn0019982	Gs1l	protein_coding	GS1-like [Source:FlyBase gene name;Acc:FBgn0019982]	734.778	0.727361	0.000442647	3.35394	1206.92	1383.96	772.566
FBgn0027565	CG5498	protein_coding		262.119	0.726576	0.0120423	1.91929	336.939	313.059	191.528
FBgn0015925	csul	protein_coding	capsuleen [Source:FlyBase gene name;Acc:FBgn0015925]	269.361	0.723985	0.0172761	1.76255	313.556	347.273	192.604
FBgn0015776	nrv1	protein_coding	nervana 1 [Source:FlyBase gene name;Acc:FBgn0015776]	5193.54	0.723072	1.72638e-06	5.76286	10236.3	11637.9	6601.24
FBgn0259224	CG42324	protein_coding		452.787	0.722882	0.0218264	1.66102	428.88	588.482	293.747
FBgn0038804	CG10877	protein_coding		763.867	0.722287	0.0206144	1.68583	1023.04	1241.97	667.118
FBgn0032076	CG9510	protein_coding		1201.69	0.721296	0.000472034	3.32603	1641.12	1697.02	997.45
FBgn0051547	CG31547	protein_coding		1556.31	0.715358	0.00797722	2.09815	1787.8	1628.59	1012.51
FBgn0050007	CG30007	protein_coding		251.982	0.714572	0.0419693	1.37707	361.386	384.908	220.579
FBgn0260005	wtrw	protein_coding	water witch [Source:FlyBase gene name;Acc:FBgn0260005]	646.169	0.713798	0.0255806	1.59209	910.374	1159.86	614.395
FBgn0022768	Pp2C1	protein_coding	Protein phosphatase 2C [Source:FlyBase gene name;Acc:FBgn0022768]	448.88	0.713136	0.00493378	2.30682	601.07	766.395	406.727
FBgn0031517	CG15406	protein_coding		3371.65	0.709079	0.0142748	1.84543	5311.31	6155.11	3445.34
FBgn0037955	CG6950	protein_coding		1744.78	0.708139	0.014587	1.83603	2199.67	2764.49	1481.65
FBgn0023507	CG3835	protein_coding		4475.84	0.70631	2.1844e-05	4.66067	5064.72	6035.36	3359.26
FBgn0031974	CG12560	protein_coding		315.655	0.704979	0.00408714	2.38858	410.28	460.179	260.391
FBgn0027560	Tps1	protein_coding	Trehalose-6-phosphate synthase 1 [Source:FlyBase gene name;Acc:FBgn0027560]	7376.6	0.695437	0.0499357	1.30159	10762.4	16766.6	8342.21
FBgn0031148	Cbs	protein_coding	Cystathionine beta-synthase [Source:FlyBase gene name;Acc:FBgn0031148]	445.318	0.694707	0.048788	1.31169	733.401	665.463	421.791
FBgn0053258	CG33258	protein_coding		4480.19	0.689714	0.00769214	2.11395	4613.52	5854.02	3165.58
FBgn0001149	GstD1	protein_coding	Glutathione S transferase D1 [Source:FlyBase gene name;Acc:FBgn0001149]	9826.08	0.688676	9.37999e-07	6.0278	17949.7	16496.3	10650.2
FBgn0261608	RpL37A	protein_coding	Ribosomal protein L37A [Source:FlyBase gene name;Acc:FBgn0261608]	8738.64	0.68477	0.000558183	3.25322	8873.09	9959.71	5759.81
FBgn0052626	AMPdeam	protein_coding	AMP deaminase [Source:FlyBase gene name;Acc:FBgn0052626]	3556.12	0.681281	0.00610542	2.21428	5716.28	6148.26	3653.01
FBgn0037446	Zif	protein_coding	Zinc-finger protein [Source:FlyBase gene name;Acc:FBgn0037446]	215.066	0.672771	0.031669	1.49937	342.785	326.744	206.592
FBgn0051635	CG31635	protein_coding		1011.29	0.6726	0.00950291	2.02214	1418.97	1664.51	950.106
FBgn0037973	CG18547	protein_coding		1573.25	0.671602	0.00290181	2.53733	2996.85	3399.17	1995.98
FBgn0030828	CG5162	protein_coding		616.379	0.669474	0.000974523	3.01121	1042.71	1202.62	698.322
FBgn0263200	Galt	protein_coding	Galactose-1-phosphate uridylyltransferase [Source:FlyBase gene name;Acc:FBgn0263200]	740.215	0.669194	0.000237105	3.62506	1329.69	1502	883.394
FBgn0039328	CHKov2	protein_coding	CHKov2 [Source:FlyBase gene name;Acc:FBgn0039328]	275.244	0.6679	0.0126307	1.89857	367.764	420.833	242.099
FBgn0036663	CG9674	protein_coding		6370.22	0.66597	0.000111046	3.9545	9590.02	10303.6	6220.34
FBgn0019637	Atu	protein_coding	Another transcription unit [Source:FlyBase gene name;Acc:FBgn0019637]	328.752	0.663982	0.00411325	2.38581	419.846	410.569	258.239
FBgn0052695	CG32695	protein_coding		511.239	0.66248	0.0148876	1.82717	627.111	816.005	444.387
FBgn0266918	CG32486	protein_coding		859.788	0.66147	0.00851345	2.06989	1106.48	1137.62	696.17
FBgn0035359	CG1143	protein_coding		1677.95	0.660556	0.000460485	3.33678	2381.43	2078.5	1398.8
FBgn0037607	CG8036	protein_coding		6642.46	0.656212	0.0113662	1.94439	12034.2	14966.9	8513.29
FBgn0037899	RpL24-like	protein_coding	Ribosomal protein L24-like [Source:FlyBase gene name;Acc:FBgn0037899]	1499.29	0.654316	0.00576077	2.23952	1338.19	1556.74	896.306
FBgn0033224	Nop17l	protein_coding	Nop17 like [Source:FlyBase gene name;Acc:FBgn0033224]	1754.8	0.652246	0.000374082	3.42703	2217.21	2316.29	1425.7
FBgn0052843	Dh31-R	protein_coding	Diuretic hormone 31 Receptor [Source:FlyBase gene name;Acc:FBgn0052843]	1168.32	0.651146	0.0197869	1.70362	1243.59	1708.99	915.674
FBgn0034728	rad50	protein_coding	rad50 [Source:FlyBase gene name;Acc:FBgn0034728]	312.704	0.647762	0.022651	1.64491	384.239	381.487	238.871
FBgn0035358	CG14949	protein_coding		1550.71	0.643197	0.00111619	2.95226	2335.19	2177.72	1433.23
FBgn0037468	CG1943	protein_coding		1112.05	0.641757	0.0113662	1.94439	1823.94	1905.72	1182.52
FBgn0262954	Rpb12	protein_coding	Rpb12 [Source:FlyBase gene name;Acc:FBgn0262954]	286.334	0.636552	0.0311482	1.50657	252.97	232.655	151.716
FBgn0036106	CG6409	protein_coding		12453.8	0.636513	0.00840974	2.07522	14348.1	13016.7	8631.65
FBgn0025621	CG16989	protein_coding		1772.38	0.634543	0.0332458	1.47826	877.956	993.918	574.583
FBgn0038504	Sur-8	protein_coding	Sur-8 [Source:FlyBase gene name;Acc:FBgn0038504]	1300.71	0.629798	0.0217048	1.66344	1437.57	1756.89	1008.21
FBgn0040252	Ugt86Dh	protein_coding	Ugt86Dh [Source:FlyBase gene name;Acc:FBgn0040252]	1347.82	0.627995	0.00151168	2.82054	1488.59	1618.32	989.918
FBgn0265512	mlt	protein_coding	mulet [Source:FlyBase gene name;Acc:FBgn0265512]	1229.69	0.621725	0.02416	1.6169	1431.2	1666.22	984.538
FBgn0038972	CG7054	protein_coding		1040.43	0.618151	0.0132179	1.87884	1442.89	1731.23	1018.97
FBgn0001142	Gs1	protein_coding	Glutamine synthetase 1 [Source:FlyBase gene name;Acc:FBgn0001142]	1449.76	0.617289	0.0399632	1.39834	1232.43	1868.09	978.082
FBgn0001301	kel	protein_coding	kelch [Source:FlyBase gene name;Acc:FBgn0001301]	424.99	0.613182	0.0150307	1.82302	395.399	449.915	267.923
FBgn0020236	ATPCL	protein_coding	ATP citrate lyase [Source:FlyBase gene name;Acc:FBgn0020236]	3303.27	0.601758	0.0371045	1.43057	4557.19	5351.08	3216.16
FBgn0015268	Nap1	protein_coding	Nucleosome assembly protein 1 [Source:FlyBase gene name;Acc:FBgn0015268]	3035.31	0.601229	0.000595494	3.22512	3451.77	3672.88	2323.08
FBgn0000723	FER	protein_coding	FER ortholog (H. sapiens) [Source:FlyBase gene name;Acc:FBgn0000723]	1301.4	0.60068	0.00254298	2.59466	2022.17	2184.57	1376.2
FBgn0028473	Non1	protein_coding	Novel nucleolar protein 1 [Source:FlyBase gene name;Acc:FBgn0028473]	8882.36	0.599856	0.0200029	1.69891	6081.39	7405.63	4326.59
FBgn0052054	CG32054	protein_coding		1803.74	0.597441	0.00874118	2.05843	2206.05	2004.94	1375.12
FBgn0260744	Tango9	protein_coding	Transport and Golgi organization 9 [Source:FlyBase gene name;Acc:FBgn0260744]	1146.23	0.596716	0.0012728	2.89524	1300.46	1478.05	905.99

## Sheet: Mutant Down p≤0.05
Gene	Associated Gene Name	Gene type	Description	baseMean	log2FoldChange	padj	Transformed Padj	TransHet_MPC_1	TransHet_MPC_2	PreciseControl_2
FBgn0036738	CG7542	protein_coding		18249.5	-7.10984	3.74153e-232	231.427	24.9782	23.9498	5273.46
FBgn0038662	Mpc1	protein_coding	Mitochondrial pyruvate carrier [Source:FlyBase gene name;Acc:FBgn0038662]	1209.11	-6.78978	4.43144e-120	119.353	5.3145	13.6856	1997.05
FBgn0035780	CG18417	protein_coding		314.287	-4.79684	4.34229e-40	39.3623	3.72015	3.4214	321.723
FBgn0037548	CG7900	protein_coding		765.263	-3.57063	1.05988e-23	22.9747	3.1887	5.13211	124.816
FBgn0035887	Jon66Cii	protein_coding	Jonah 66Cii [Source:FlyBase gene name;Acc:FBgn0035887]	398.502	-3.46751	4.79617e-12	11.3191	12.7548	8.55351	599.331
FBgn0036948	CG7298	protein_coding		10160.7	-3.32185	3.554e-39	38.4493	899.745	643.224	9064.2
FBgn0035886	Jon66Ci	protein_coding	Jonah 66Ci [Source:FlyBase gene name;Acc:FBgn0035886]	1718.48	-3.31766	9.76537e-27	26.0103	96.7239	109.485	1295.5
FBgn0039768	CG15533	protein_coding		2198.26	-3.25945	1.89473e-21	20.7225	97.2554	107.774	1315.94
FBgn0039774	CDase	protein_coding	Ceramidase [Source:FlyBase gene name;Acc:FBgn0039774]	1440.16	-3.22298	1.58487e-47	46.8	197.699	130.013	1768.94
FBgn0036361	CG10154	protein_coding		42.7577	-3.21477	2.50853e-12	11.6006	29.2298	17.107	409.955
FBgn0034712	CG3264	protein_coding		391.825	-3.18686	2.4354e-09	8.61343	3.72015	5.13211	794.086
FBgn0034711	CG3290	protein_coding		14597.4	-3.15901	1.47628e-46	45.8308	1991.34	1893.75	19323.8
FBgn0034582	Cht9	protein_coding	Cht9 [Source:FlyBase gene name;Acc:FBgn0034582]	2813.67	-3.14619	2.36725e-25	24.6258	259.879	330.166	3212.93
FBgn0032809	CG13078	protein_coding		793.848	-3.11327	2.55694e-35	34.5923	159.435	160.806	1604.31
FBgn0033541	CG12934	protein_coding		251.644	-3.11203	4.89305e-34	33.3104	75.4659	85.5351	806.998
FBgn0051091	CG31091	protein_coding		251.891	-3.07105	9.49755e-09	8.02239	54.7394	65.0067	2007.81
FBgn0034710	CG3292	protein_coding		27.6717	-3.02169	1.73948e-09	8.75958	3.1887	0	64.5598
FBgn0036023	CG18179	protein_coding		969.094	-2.87091	1.11095e-19	18.9543	628.174	460.179	5209.98
FBgn0043791	CG8147	protein_coding		477.949	-2.83162	1.23369e-09	8.90879	9.03465	10.2642	145.26
FBgn0036321	CG14120	protein_coding		10664.1	-2.47581	7.60955e-24	23.1186	2231.56	2116.14	13314.4
FBgn0036953	CG17145	protein_coding		53.1285	-2.46172	5.36521e-09	8.27041	42.516	46.189	359.383
FBgn0041780	Ssl2	protein_coding	Strictosidine synthase-like 2 [Source:FlyBase gene name;Acc:FBgn0041780]	25.7807	-2.45792	2.55027e-06	5.59341	4.78305	0	48.4199
FBgn0003388	shd	protein_coding	shade [Source:FlyBase gene name;Acc:FBgn0003388]	82.8986	-2.45619	1.56914e-06	5.80434	24.9782	35.9247	331.407
FBgn0039778	Jon99Fi	protein_coding	Jonah 99Fi [Source:FlyBase gene name;Acc:FBgn0039778]	23875.2	-2.43521	1.04195e-57	56.9822	6822.76	6719.64	38011.8
FBgn0027611	LM408	protein_coding	Lysosomal alpha-mannosidase [Source:FlyBase gene name;Acc:FBgn0027611]	24202	-2.41853	1.66861e-19	18.7776	3857.27	4283.6	24145.4
FBgn0015033	Cyp4d8	protein_coding	Cytochrome P450-4d8 [Source:FlyBase gene name;Acc:FBgn0015033]	455.995	-2.41574	1.47363e-19	18.8316	80.249	88.9565	504.643
FBgn0005391	Yp2	protein_coding	Yolk protein 2 [Source:FlyBase gene name;Acc:FBgn0005391]	6773.24	-2.39153	2.87561e-14	13.5413	2207.64	2223.91	13914.8
FBgn0036575	CG5157	protein_coding		320.885	-2.38788	3.12992e-10	9.50447	166.875	78.6923	876.938
FBgn0039591	CG9988	protein_coding		175.877	-2.38276	1.72316e-11	10.7637	80.249	70.1388	504.643
FBgn0051269	CG31269	protein_coding		336.957	-2.37108	2.2352e-19	18.6507	113.199	111.196	656.358
FBgn0028945	CG7631	protein_coding		1167.13	-2.36336	9.68881e-17	16.0137	459.704	508.079	2876.14
FBgn0085244	CG34215	protein_coding		44.2924	-2.35364	1.14229e-07	6.94223	11.6919	15.3963	101.144
FBgn0032067	CG9465	protein_coding		331.201	-2.33026	5.57891e-08	7.25345	50.4878	85.5351	478.819
FBgn0025456	CREG	protein_coding	Cellular Repressor of E1A-stimulated Genes [Source:FlyBase gene name;Acc:FBgn0025456]	1412.09	-2.26207	3.06407e-43	42.5137	302.395	364.38	1637.67
FBgn0038730	CG6300	protein_coding		61.8762	-2.23086	2.22252e-05	4.65315	3.1887	5.13211	46.2679
FBgn0038873	CG5892	protein_coding		22.1281	-2.2236	6.09303e-05	4.21517	0	1.7107	101.144
FBgn0264674	CR43959	lincRNA		12.3361	-2.21385	9.4348e-05	4.02527	3.72015	5.13211	50.5719
FBgn0034563	CG15649	protein_coding		23.6442	-2.20316	5.2241e-05	4.28199	5.3145	6.84281	61.3319
FBgn0036821	CG3961	protein_coding		1040.13	-2.19697	2.0065e-21	20.6976	149.338	183.045	805.922
FBgn0259229	CG42329	protein_coding		116.195	-2.19367	4.20041e-06	5.37671	14.3492	10.2642	96.8398
FBgn0263220	Hk	protein_coding	Hyperkinetic [Source:FlyBase gene name;Acc:FBgn0263220]	166.475	-2.18733	9.64727e-10	9.0156	73.3401	56.4532	375.523
FBgn0028468	rtet	protein_coding	tetracycline resistance [Source:FlyBase gene name;Acc:FBgn0028468]	622.07	-2.18528	7.66126e-20	19.1157	128.08	133.435	643.446
FBgn0052279	Drsl2	protein_coding	Drosomycin-like 2 [Source:FlyBase gene name;Acc:FBgn0052279]	119.867	-2.18438	0.000102816	3.98794	2.1258	1.7107	261.467
FBgn0038652	CG7720	protein_coding		4247.37	-2.16994	1.39802e-17	16.8545	1145.28	1284.74	6014.83
FBgn0087002	Rfabg	protein_coding	Retinoid- and fatty acid-binding glycoprotein [Source:FlyBase gene name;Acc:FBgn0087002]	2057.17	-2.13605	3.23632e-09	8.48995	764.757	831.401	4333.04
FBgn0039472	CG17192	protein_coding		14812	-2.11092	1.99909e-05	4.69917	3617.05	6581.07	35926.5
FBgn0085195	CG34166	protein_coding		79.3851	-2.09801	6.61172e-05	4.17969	10.0976	23.9498	123.74
FBgn0010358	deltaTry	protein_coding	deltaTrypsin [Source:FlyBase gene name;Acc:FBgn0010358]	430.595	-2.09132	1.87825e-07	6.72625	73.8716	111.196	496.035
FBgn0053306	CG33306	protein_coding		2917.72	-2.08554	6.99685e-27	26.1551	1028.89	1122.22	4807.56
FBgn0033292	Cyp4ad1	protein_coding	Cyp4ad1 [Source:FlyBase gene name;Acc:FBgn0033292]	1331.38	-2.07315	8.21742e-30	29.0853	529.324	574.796	2429.6
FBgn0262580	CG43120	protein_coding		641.376	-2.06038	8.21685e-05	4.08529	148.275	37.6354	687.562
FBgn0004047	Yp3	protein_coding	Yolk protein 3 [Source:FlyBase gene name;Acc:FBgn0004047]	5843.74	-2.0559	1.59722e-05	4.79664	1507.72	1732.94	10092.9
FBgn0036837	CG18135	protein_coding		6118.72	-2.04756	5.18886e-22	21.2849	1983.9	1869.8	8465.95
FBgn0034784	CG9826	protein_coding		370.793	-2.04284	1.20685e-07	6.91835	113.199	141.988	655.282
FBgn0004911	Eip63F-2	lincRNA	Ecdysone-induced protein 63F 2 [Source:FlyBase gene name;Acc:FBgn0004911]	28.1204	-2.01005	0.000376907	3.42377	1.59435	0	19.368
FBgn0028948	CG15253	protein_coding		248.929	-2.00119	1.05556e-08	7.97652	46.2362	82.1137	289.443
FBgn0030148	CG3106	protein_coding		5951.24	-1.9987	1.24582e-28	27.9045	1969.55	2181.15	8638.11
FBgn0015035	Cyp4e3	protein_coding	Cytochrome P450-4e3 [Source:FlyBase gene name;Acc:FBgn0015035]	522.569	-1.98979	6.73227e-07	6.17184	71.2143	66.7174	341.091
FBgn0032066	CG9463	protein_coding		2493.47	-1.98002	0.000598234	3.22313	241.278	460.179	3414.14
FBgn0025583	IM2	protein_coding	Immune induced molecule 2 [Source:FlyBase gene name;Acc:FBgn0025583]	62.6267	-1.97519	0.000479861	3.31888	21.7895	10.2642	138.804
FBgn0001114	Glt	protein_coding	Glutactin [Source:FlyBase gene name;Acc:FBgn0001114]	234.499	-1.97049	7.63562e-08	7.11716	73.3401	61.5853	324.951
FBgn0037167	CG11425	protein_coding		46.3254	-1.96056	2.60336e-05	4.58447	15.9435	8.55351	75.3198
FBgn0003861	trp	protein_coding	transient receptor potential [Source:FlyBase gene name;Acc:FBgn0003861]	14.0155	-1.95351	0.00106937	2.97087	3.72015	0	49.4959
FBgn0031654	Jon25Bii	protein_coding	Jonah 25Bii [Source:FlyBase gene name;Acc:FBgn0031654]	17942.3	-1.95132	0.000138204	3.85948	3095.17	5694.93	27135.6
FBgn0261362	PPO1	protein_coding	Prophenoloxidase 1 [Source:FlyBase gene name;Acc:FBgn0261362]	112.632	-1.93978	0.000236855	3.62552	54.2079	47.8997	333.559
FBgn0039678	Obp99a	protein_coding	Odorant-binding protein 99a [Source:FlyBase gene name;Acc:FBgn0039678]	85.0218	-1.93831	0.000300084	3.52276	12.2234	13.6856	88.2318
FBgn0000241	bw	protein_coding	brown [Source:FlyBase gene name;Acc:FBgn0000241]	87.5121	-1.91403	3.51962e-06	5.4535	35.6072	35.9247	173.236
FBgn0035619	CG10592	protein_coding		19511.1	-1.90732	1.49684e-10	9.82482	3896.06	4026.99	16305.7
FBgn0010425	epsilonTry	protein_coding	epsilonTrypsin [Source:FlyBase gene name;Acc:FBgn0010425]	29187.2	-1.90427	1.49684e-10	9.82482	8527.65	13312.7	45624.4
FBgn0264486	CG43894	protein_coding		29.9724	-1.90166	0.000911409	3.04029	2.65725	1.7107	24.7479
FBgn0033367	PPO2	protein_coding	Prophenoloxidase 2 [Source:FlyBase gene name;Acc:FBgn0033367]	107.447	-1.89729	0.000198697	3.70181	68.0256	54.7425	364.763
FBgn0013772	Cyp6a8	protein_coding	Cytochrome P450-6a8 [Source:FlyBase gene name;Acc:FBgn0013772]	609.495	-1.85743	9.01666e-06	5.04495	60.5853	107.774	371.219
FBgn0051469	CG31469	protein_coding		217.856	-1.83991	2.33975e-06	5.63083	89.8151	27.3712	274.379
FBgn0053966	CG33966	protein_coding		805.125	-1.81649	3.12366e-18	17.5053	385.833	472.154	1583.87
FBgn0038731	CG11659	protein_coding		40.6834	-1.81249	0.000674005	3.17134	13.8177	18.8177	89.3078
FBgn0035620	CG5150	protein_coding		17010.3	-1.80515	3.38058e-07	6.47101	4166.04	3854.21	15942
FBgn0031143	CG1532	protein_coding		2912.41	-1.79765	5.47391e-14	13.2617	1142.62	1236.84	4414.82
FBgn0034783	CG9825	protein_coding		780.036	-1.79366	1.82201e-06	5.73945	822.685	858.772	3708.96
FBgn0035282	CNMa	protein_coding	CNMamide [Source:FlyBase gene name;Acc:FBgn0035282]	303.475	-1.78595	0.00372609	2.42875	4.2516	10.2642	152.792
FBgn0005670	Cyp4d1	protein_coding	Cytochrome P450-4d1 [Source:FlyBase gene name;Acc:FBgn0005670]	879.95	-1.76803	4.49445e-18	17.3473	208.86	241.209	791.934
FBgn0031034	CG14205	protein_coding		5052.86	-1.7553	4.3785e-07	6.35867	680.256	975.1	3095.64
FBgn0034782	CG12490	protein_coding		54.4495	-1.7506	0.00145576	2.83691	40.9217	53.0318	259.315
FBgn0040251	Ugt86Di	protein_coding	Ugt86Di [Source:FlyBase gene name;Acc:FBgn0040251]	75.2013	-1.72325	0.00011039	3.95707	28.1669	22.2391	110.828
FBgn0050082	CG30082	protein_coding		18.4993	-1.72087	0.00418645	2.37815	14.3492	5.13211	66.7118
FBgn0000473	Cyp6a2	protein_coding	Cytochrome P450-6a2 [Source:FlyBase gene name;Acc:FBgn0000473]	378.932	-1.71853	4.44969e-06	5.35167	132.331	176.202	598.255
FBgn0037046	CG10581	protein_coding		36.4094	-1.70844	0.00224146	2.64947	13.2863	11.9749	68.8638
FBgn0035006	CG4563	protein_coding		850.624	-1.70198	1.38597e-09	8.85825	623.923	631.249	2275.73
FBgn0004045	Yp1	protein_coding	Yolk protein 1 [Source:FlyBase gene name;Acc:FBgn0004045]	9692.48	-1.68977	4.98197e-09	8.3026	4847.36	5659	18725.6
FBgn0023540	CG3630	protein_coding		18.0826	-1.68587	0.00530776	2.27509	3.72015	8.55351	35.5079
FBgn0036362	CG10725	protein_coding		2011.44	-1.67351	3.20269e-16	15.4945	3572.41	3149.4	11772.5
FBgn0016075	vkg	protein_coding	viking [Source:FlyBase gene name;Acc:FBgn0016075]	255.477	-1.66849	4.7212e-08	7.32595	238.09	289.109	950.106
FBgn0031248	CG11912	protein_coding		4193.16	-1.66554	1.87825e-07	6.72625	746.156	981.943	2972.98
FBgn0030097	CG12115	protein_coding		22.1744	-1.65622	0.0071609	2.14503	4.2516	6.84281	35.5079
FBgn0000046	Act87E	protein_coding	Actin 87E [Source:FlyBase gene name;Acc:FBgn0000046]	464.659	-1.64847	1.04847e-08	7.97944	415.594	347.273	1341.77
FBgn0034403	CG18190	protein_coding		61.7071	-1.6415	0.00540076	2.26755	0	3.4214	11.836
FBgn0038479	CG17477	protein_coding		143.959	-1.63938	9.12184e-05	4.03992	31.887	59.8746	163.552
FBgn0031261	nAChRbeta3	protein_coding	nicotinic Acetylcholine Receptor beta3 [Source:FlyBase gene name;Acc:FBgn0031261]	47.8373	-1.63676	0.00109573	2.96029	27.104	32.5033	126.968
FBgn0000299	Cg25C	protein_coding	Collagen type IV [Source:FlyBase gene name;Acc:FBgn0000299]	401.299	-1.63034	2.78412e-08	7.55531	400.182	460.179	1499.94
FBgn0036831	CG6839	protein_coding		3839.62	-1.61859	1.87639e-05	4.72668	1648.56	1702.15	5995.46
FBgn0052284	CG32284	protein_coding		1149.21	-1.6163	9.71704e-05	4.01247	25.5096	20.5284	82.8518
FBgn0032253	CG5322	protein_coding		3091.54	-1.61467	1.27609e-07	6.89412	720.115	872.458	2624.36
FBgn0038482	CG4053	protein_coding		648.938	-1.60931	1.32497e-07	6.87779	286.452	277.134	945.802
FBgn0036750	CG6034	protein_coding		13.6834	-1.60384	0.0126307	1.89857	6.3774	3.4214	40.8879
FBgn0051089	CG31089	protein_coding		41.5948	-1.60273	0.0113662	1.94439	27.104	13.6856	135.576
FBgn0020906	Jon25Bi	protein_coding	Jonah 25Bi [Source:FlyBase gene name;Acc:FBgn0020906]	13774.2	-1.59465	0.00447112	2.34958	4468.43	8255.85	29819.1
FBgn0029990	CG2233	protein_coding		550.692	-1.59174	7.73203e-05	4.11171	245.53	287.398	957.638
FBgn0035636	Cralbp	protein_coding	Cellular retinaldehyde binding protein [Source:FlyBase gene name;Acc:FBgn0035636]	71.7737	-1.58086	0.000199659	3.69971	38.2644	44.4783	149.564
FBgn0038889	CG7922	protein_coding		469.233	-1.569	6.01936e-09	8.22045	125.422	135.145	408.879
FBgn0035936	Tsp66E	protein_coding	Tetraspanin 66E [Source:FlyBase gene name;Acc:FBgn0035936]	190.756	-1.56293	3.63769e-07	6.43917	45.7047	70.1388	176.464
FBgn0264305	CG43783	protein_coding		453.971	-1.55993	5.48376e-15	14.2609	165.281	171.07	513.251
FBgn0038717	CG17751	protein_coding		1083.96	-1.55882	4.1779e-05	4.37904	739.247	740.734	2583.47
FBgn0028408	Drep-2	protein_coding	DNA fragmentation factor-related protein 2 [Source:FlyBase gene name;Acc:FBgn0028408]	55.746	-1.55308	0.0016444	2.78399	22.8524	34.214	106.524
FBgn0003356	Jon99Cii	protein_coding	Jonah 99Cii [Source:FlyBase gene name;Acc:FBgn0003356]	48594.5	-1.54864	2.22252e-05	4.65315	29272.3	45439.7	128349
FBgn0085456	CG34427	protein_coding		11.9482	-1.54613	0.0172585	1.763	1.0629	3.4214	25.8239
FBgn0039520	Gr98a	protein_coding	Gustatory receptor 98a [Source:FlyBase gene name;Acc:FBgn0039520]	270.946	-1.53156	3.46312e-07	6.46053	116.388	135.145	392.739
FBgn0051015	PH4alphaPV	protein_coding	prolyl-4-hydroxylase-alpha PV [Source:FlyBase gene name;Acc:FBgn0051015]	123.531	-1.52855	0.00206523	2.68503	69.0885	73.5602	272.227
FBgn0039321	CG10550	protein_coding		905.751	-1.52662	3.13625e-15	14.5036	227.992	215.548	661.738
FBgn0035781	CG8560	protein_coding		9556.92	-1.52087	8.74662e-07	6.05816	1621.45	2925.3	6957.4
FBgn0030836	CG8664	protein_coding		65.425	-1.51607	0.00103238	2.98616	25.5096	27.3712	93.6118
FBgn0036956	CG13813	protein_coding		113.879	-1.51224	0.00195736	2.70833	24.9782	42.7676	117.284
FBgn0003357	Jon99Ciii	protein_coding	Jonah 99Ciii [Source:FlyBase gene name;Acc:FBgn0003357]	41249.2	-1.50699	3.2107e-05	4.4934	26255.2	40281.9	110321
FBgn0053511	CG33511	protein_coding		327.031	-1.50655	1.20305e-07	6.91972	113.73	140.278	381.979
FBgn0030098	CG12057	protein_coding		38167.8	-1.50021	4.99595e-11	10.3014	21261.7	24918.1	68909
FBgn0264845	Tep5	protein_coding	Thioester-containing protein 5 [Source:FlyBase gene name;Acc:FBgn0264845]	11.4806	-1.49915	0.0201871	1.69493	0.53145	0	18.292
FBgn0000565	Eip71CD	protein_coding	Ecdysone-induced protein 28/29kD [Source:FlyBase gene name;Acc:FBgn0000565]	4412.3	-1.49299	0.000118209	3.92735	1096.91	1469.49	4058.66
FBgn0032068	CG9466	protein_coding		17140	-1.49013	1.56746e-05	4.8048	5402.19	8955.53	22453.9
FBgn0024315	Picot	protein_coding	Picot [Source:FlyBase gene name;Acc:FBgn0024315]	14266.7	-1.47591	3.62524e-08	7.44066	6465.09	7920.55	21353.2
FBgn0034047	CG12970	protein_coding		168.039	-1.47226	0.00230493	2.63734	47.8305	27.3712	137.728
FBgn0035192	CG9194	protein_coding		31.6105	-1.47054	0.00610542	2.21428	22.3209	17.107	77.4718
FBgn0039470	CG6296	protein_coding		3662.73	-1.46386	3.58396e-05	4.44564	110.542	102.642	296.975
FBgn0036024	CG18180	protein_coding		35181.4	-1.46197	1.66861e-19	18.7776	25738.7	28363.4	76909.1
FBgn0015221	Fer2LCH	protein_coding	Ferritin 2 light chain homologue [Source:FlyBase gene name;Acc:FBgn0015221]	32715.2	-1.46129	6.51847e-17	16.1859	22891.2	19163.3	59786.7
FBgn0014427	CG11899	protein_coding		527.447	-1.46129	1.41695e-11	10.8486	379.455	396.883	1121.19
FBgn0032494	CG5945	protein_coding		112.74	-1.44855	0.000211214	3.67528	106.29	112.906	354.003
FBgn0052224	CR32224	lincRNA		53.8668	-1.44797	0.0254702	1.59397	3.1887	1.7107	17.216
FBgn0038973	Pebp1	protein_coding	Phosphatidylethanolamine-binding protein 1 [Source:FlyBase gene name;Acc:FBgn0038973]	33370.8	-1.44784	4.62421e-05	4.33496	12250.5	11085.4	35033.4
FBgn0031913	CG5958	protein_coding		3802.66	-1.44457	1.4407e-09	8.84143	1587.44	1520.81	4428.81
FBgn0040735	CG16836	protein_coding		22.2684	-1.43813	0.0183299	1.73684	8.5032	8.55351	36.5839
FBgn0034329	IM1	protein_coding	Immune induced molecule 1 [Source:FlyBase gene name;Acc:FBgn0034329]	7.96673	-1.43245	0.0329943	1.48156	3.1887	3.4214	23.6719
FBgn0032810	CG13077	protein_coding		238.368	-1.42832	6.82541e-06	5.16587	115.325	135.145	364.763
FBgn0035607	CG4835	protein_coding		318.151	-1.42309	6.16683e-06	5.20994	111.605	94.0886	302.355
FBgn0038291	CG3984	protein_coding		10.2286	-1.42212	0.034501	1.46217	5.3145	3.4214	31.2039
FBgn0039930	CG11077	protein_coding		231.114	-1.41477	2.35969e-07	6.62715	71.7458	66.7174	197.984
FBgn0005664	Cry	protein_coding	Crystallin [Source:FlyBase gene name;Acc:FBgn0005664]	630.105	-1.40572	0.000297273	3.52684	638.803	328.455	1518.23
FBgn0034580	Cht8	protein_coding	Cht8 [Source:FlyBase gene name;Acc:FBgn0034580]	1480.57	-1.40164	1.79924e-07	6.74491	648.901	838.244	2076.67
FBgn0038095	Cyp304a1	protein_coding	Cyp304a1 [Source:FlyBase gene name;Acc:FBgn0038095]	11.9017	-1.39932	0.0370266	1.43149	6.3774	5.13211	32.2799
FBgn0035978	UGP	protein_coding	UGP [Source:FlyBase gene name;Acc:FBgn0035978]	1518.37	-1.39835	1.25514e-05	4.90131	868.39	899.829	2553.34
FBgn0032069	CG9468	protein_coding		35446.3	-1.39517	0.000100711	3.99692	16493	25060.1	61543.8
FBgn0085486	CG34457	protein_coding		31.9769	-1.38691	0.0301187	1.52116	6.90885	13.6856	41.9639
FBgn0040257	Ugt86Dc	protein_coding	Ugt86Dc [Source:FlyBase gene name;Acc:FBgn0040257]	859.412	-1.38309	2.32234e-08	7.63407	669.627	509.789	1644.12
FBgn0039682	Obp99c	protein_coding	Odorant-binding protein 99c [Source:FlyBase gene name;Acc:FBgn0039682]	212.409	-1.38261	9.86473e-05	4.00592	114.262	140.278	367.991
FBgn0031249	CG11911	protein_coding		34971.5	-1.36587	4.93316e-22	21.3069	16715.2	17786.2	45199.4
FBgn0033204	CG2065	protein_coding		312.487	-1.35227	0.000138543	3.85842	440.572	321.612	1135.18
FBgn0037684	CG8129	protein_coding		270.918	-1.35129	1.36076e-07	6.86622	169.533	237.788	540.151
FBgn0027348	bgm	protein_coding	bubblegum [Source:FlyBase gene name;Acc:FBgn0027348]	2141.97	-1.34316	1.20468e-05	4.91913	1009.76	1173.54	2977.28
FBgn0053965	CG33965	protein_coding		584.141	-1.34311	6.82541e-06	5.16587	183.35	263.448	596.103
FBgn0029795	CG15773	protein_coding		458.636	-1.34267	1.95612e-07	6.7086	200.357	224.102	562.747
FBgn0038975	Nrx-1	protein_coding	Neurexin 1 [Source:FlyBase gene name;Acc:FBgn0038975]	493.777	-1.33844	8.61604e-05	4.06469	106.822	97.51	277.607
FBgn0003996	w	protein_coding	white [Source:FlyBase gene name;Acc:FBgn0003996]	1248.54	-1.33701	0.0197125	1.70526	0.53145	0	3.22799
FBgn0028532	CG7968	protein_coding		1505.36	-1.33538	3.91075e-06	5.40774	737.122	682.57	1908.82
FBgn0264823	CR44031	lincRNA		29.3667	-1.33182	0.0166812	1.77777	12.7548	10.2642	39.8119
FBgn0040060	yip7	protein_coding	yippee interacting protein 7 [Source:FlyBase gene name;Acc:FBgn0040060]	192887	-1.32714	8.0449e-06	5.09448	93939.7	117961	285110
FBgn0264775	CG44013	protein_coding		1454.72	-1.32649	4.33051e-05	4.36346	235.964	160.806	534.771
FBgn0036833	CG3819	protein_coding		12024.9	-1.32391	8.27207e-06	5.08239	6613.9	7617.76	19180.7
FBgn0052751	CG32751	protein_coding		1526.79	-1.32313	0.0478043	1.32053	678.662	918.647	3571.24
FBgn0035309	CG15879	protein_coding		428.178	-1.30998	1.06631e-08	7.97212	140.303	157.385	377.675
FBgn0261649	tinc	protein_coding	tincar [Source:FlyBase gene name;Acc:FBgn0261649]	49.0509	-1.30925	0.00495069	2.30533	65.3684	41.0569	168.932
FBgn0041234	Gr59f	protein_coding	Gustatory receptor 59f [Source:FlyBase gene name;Acc:FBgn0041234]	25.3818	-1.30483	0.0344842	1.46238	9.03465	5.13211	27.9759
FBgn0053926	CG33926	protein_coding		4789.83	-1.2952	0.00058998	3.22916	3245.04	1500.29	6539.91
FBgn0020508	Ag5r2	protein_coding	Antigen 5-related 2 [Source:FlyBase gene name;Acc:FBgn0020508]	7121.05	-1.28846	9.90329e-07	6.00422	2918.19	2921.88	7487.87
FBgn0031791	AANATL2	protein_coding	Arylalkylamine N-acyltransferase-like 2 [Source:FlyBase gene name;Acc:FBgn0031791]	87.906	-1.28584	0.0044138	2.35519	44.1104	85.5351	180.768
FBgn0015222	Fer1HCH	protein_coding	Ferritin 1 heavy chain homologue [Source:FlyBase gene name;Acc:FBgn0015222]	32795.1	-1.28449	2.0178e-13	12.6951	23169.6	21989.4	56526.4
FBgn0030509	CG11162	protein_coding		234.226	-1.27561	0.0147113	1.83235	5.3145	1.7107	13.988
FBgn0032264	Lip4	protein_coding	Lipase 4 [Source:FlyBase gene name;Acc:FBgn0032264]	263.892	-1.27284	0.00888301	2.05144	216.3	102.642	474.515
FBgn0039714	Zip99C	protein_coding	Zinc/iron regulated transporter-related protein 99C [Source:FlyBase gene name;Acc:FBgn0039714]	3121.74	-1.27131	4.63119e-05	4.33431	3126.52	2129.82	6967.08
FBgn0001258	ImpL3	protein_coding	Ecdysone-inducible gene L3 [Source:FlyBase gene name;Acc:FBgn0001258]	1171.82	-1.27109	3.10933e-06	5.50733	786.546	598.746	1781.85
FBgn0035452	CG10359	protein_coding		79.6401	-1.27053	0.000672115	3.17256	53.6765	75.2709	168.932
FBgn0011592	fra	protein_coding	frazzled [Source:FlyBase gene name;Acc:FBgn0011592]	866.704	-1.25354	0.000249793	3.60242	490.529	378.065	1129.8
FBgn0013949	Ela	protein_coding	Elastin-like [Source:FlyBase gene name;Acc:FBgn0013949]	76.0334	-1.25059	0.0280465	1.55212	22.3209	44.4783	97.9158
FBgn0000044	Act57B	protein_coding	Actin 57B [Source:FlyBase gene name;Acc:FBgn0000044]	2949.96	-1.24808	6.52787e-09	8.18523	2639.18	2590	6490.42
FBgn0001285	Jon44E	protein_coding	Jonah 44E [Source:FlyBase gene name;Acc:FBgn0001285]	2437.89	-1.22795	0.0010221	2.9905	1453.52	1484.89	3809.03
FBgn0259896	NimC1	protein_coding	Nimrod C1 [Source:FlyBase gene name;Acc:FBgn0259896]	36.305	-1.2249	0.0250303	1.60153	46.2362	53.0318	152.792
FBgn0263456	nwk	protein_coding	nervous wreck [Source:FlyBase gene name;Acc:FBgn0263456]	369.475	-1.22008	0.000934063	3.02962	153.058	188.177	431.475
FBgn0050354	CG30354	protein_coding		31.1187	-1.21701	0.0479411	1.31929	11.6919	8.55351	33.3559
FBgn0267002	unc-104	protein_coding	unc-104 ortholog (C. elegans) [Source:FlyBase gene name;Acc:FBgn0267002]	851.218	-1.2161	3.83978e-07	6.41569	373.61	437.94	973.778
FBgn0053510	CG33510	protein_coding		315.971	-1.21576	0.0115452	1.9376	89.8151	94.0886	242.099
FBgn0264776	CG44014	protein_coding		5852.89	-1.2157	2.47177e-06	5.60699	1896.75	1324.08	3864.98
FBgn0266084	Fhos	protein_coding	Formin homology 2 domain containing ortholog [Source:FlyBase gene name;Acc:FBgn0266084]	1007.31	-1.20924	1.53324e-15	14.8144	479.9	502.946	1150.24
FBgn0050090	CG30090	protein_coding		133.592	-1.207	0.0104712	1.98	144.554	104.353	355.079
FBgn0011556	zetaTry	protein_coding	zetaTrypsin [Source:FlyBase gene name;Acc:FBgn0011556]	2788.79	-1.20614	4.39684e-14	13.3569	871.578	1077.74	2261.75
FBgn0003137	Ppn	protein_coding	Papilin [Source:FlyBase gene name;Acc:FBgn0003137]	986.862	-1.20479	0.000101008	3.99564	917.283	1014.45	2426.37
FBgn0259209	Mlp60A	protein_coding	Muscle LIM protein at 60A [Source:FlyBase gene name;Acc:FBgn0259209]	958.439	-1.20427	2.00808e-08	7.69722	725.961	745.866	1761.41
FBgn0034356	CG10924	protein_coding		805.985	-1.20193	4.52935e-11	10.344	416.126	419.122	983.462
FBgn0031220	CG4822	protein_coding		58.5345	-1.19923	0.041785	1.37898	79.7175	35.9247	187.224
FBgn0011296	l(2)efl	protein_coding	lethal (2) essential for life [Source:FlyBase gene name;Acc:FBgn0011296]	660.866	-1.19577	0.000165713	3.78064	500.626	496.104	1235.25
FBgn0029167	Hml	protein_coding	Hemolectin [Source:FlyBase gene name;Acc:FBgn0029167]	180.523	-1.19366	0.0186441	1.72946	154.121	248.052	573.507
FBgn0037635	CG9837	protein_coding		50.524	-1.18534	0.0176003	1.75448	28.1669	27.3712	75.3198
FBgn0051343	CG31343	protein_coding		47452.3	-1.17638	5.5993e-15	14.2519	23283.9	24303.9	54557.4
FBgn0034318	CG14500	protein_coding		3785.63	-1.16768	1.10085e-11	10.9583	2077.97	2528.42	5268.08
FBgn0035090	CG2736	protein_coding		62.1885	-1.16072	0.0493587	1.30664	43.0475	35.9247	116.208
FBgn0010497	dmGlut	protein_coding	Dietary and metabolic glutamate transporter [Source:FlyBase gene name;Acc:FBgn0010497]	8780.18	-1.16036	0.0044098	2.35558	3563.91	4524.81	9901.33
FBgn0038083	CG5999	protein_coding		1616.12	-1.15967	1.25514e-05	4.90131	961.925	877.59	2164.91
FBgn0031653	Jon25Biii	protein_coding	Jonah 25Biii [Source:FlyBase gene name;Acc:FBgn0031653]	57057.2	-1.15604	1.29375e-05	4.88815	12801	21438.5	39277.1
FBgn0032923	CG9248	protein_coding		1114.78	-1.15446	7.2707e-11	10.1384	714.269	602.167	1509.62
FBgn0034709	Swim	protein_coding	Secreted Wg-interacting molecule [Source:FlyBase gene name;Acc:FBgn0034709]	1027.05	-1.14675	0.000324502	3.48878	697.263	542.293	1483.8
FBgn0035743	CG15829	protein_coding		785.123	-1.14272	0.0138265	1.85929	671.753	345.562	1324.55
FBgn0267164	CR45604	lincRNA		775.041	-1.13824	0.00373879	2.42727	382.644	544.003	1115.81
FBgn0022700	Cht4	protein_coding	Chitinase 4 [Source:FlyBase gene name;Acc:FBgn0022700]	790.662	-1.13178	0.000329961	3.48154	461.299	331.876	931.814
FBgn0039341	CG5112	protein_coding		637.477	-1.12417	4.04087e-07	6.39352	215.769	234.366	499.263
FBgn0033196	CG1358	protein_coding		846.143	-1.10992	4.62486e-10	9.3349	421.44	449.915	954.41
FBgn0036952	CG6933	protein_coding		441.187	-1.10965	0.00765675	2.11596	239.153	241.209	587.495
FBgn0037936	CG6908	protein_coding		341.987	-1.10164	0.000785831	3.10467	172.721	217.259	440.083
FBgn0025390	Mur2B	protein_coding	Mucin related 2B [Source:FlyBase gene name;Acc:FBgn0025390]	569.336	-1.10033	1.98726e-07	6.70174	364.043	326.744	767.186
FBgn0038653	CG18208	protein_coding		48.8496	-1.09991	0.0221865	1.65391	31.887	39.3462	86.0798
FBgn0051454	CG31454	protein_coding		213.875	-1.09912	2.12521e-05	4.6726	179.099	183.045	406.727
FBgn0031835	CG11319	protein_coding		121.499	-1.09854	0.00824556	2.08378	51.0192	71.8495	139.88
FBgn0031813	CG9527	protein_coding		11575.4	-1.09687	4.07621e-09	8.38974	7245.79	7735.8	16389.6
FBgn0011704	RnrS	protein_coding	Ribonucleoside diphosphate reductase small subunit [Source:FlyBase gene name;Acc:FBgn0011704]	786.112	-1.08919	7.21499e-05	4.14176	584.595	352.405	1059.86
FBgn0034490	CG9864	protein_coding		6160.91	-1.08857	0.000361923	3.44138	2079.03	2526.71	5086.24
FBgn0022702	Cht2	protein_coding	Chitinase 2 [Source:FlyBase gene name;Acc:FBgn0022702]	110.118	-1.08639	0.0071285	2.147	137.114	100.931	290.519
FBgn0010423	TpnC47D	protein_coding	Troponin C at 47D [Source:FlyBase gene name;Acc:FBgn0010423]	233.108	-1.08118	0.000344325	3.46303	154.121	198.441	389.511
FBgn0053012	CG33012	protein_coding		86.7408	-1.08111	0.0454527	1.34244	25.5096	32.5033	68.8638
FBgn0031930	CG7025	protein_coding		1538.96	-1.07836	2.41797e-07	6.61655	960.331	1074.32	2204.72
FBgn0034052	CG8299	protein_coding		1806.13	-1.06923	0.000101716	3.99261	1416.85	1691.88	3439.96
FBgn0033216	CG1946	protein_coding		876.004	-1.06323	9.27921e-10	9.03249	408.685	410.569	869.406
FBgn0030574	CG9413	protein_coding		870.829	-1.06141	0.00352956	2.45228	588.847	532.028	1262.14
FBgn0058178	CG40178	protein_coding		392.96	-1.06037	3.7326e-05	4.42799	153.589	176.202	350.775
FBgn0030837	CG8661	protein_coding		7966.39	-1.05926	3.05557e-08	7.51491	3784.99	4372.55	8656.4
FBgn0042126	CG18788	protein_coding		69.9998	-1.05485	0.0131458	1.88121	63.774	66.7174	151.716
FBgn0000043	Act42A	protein_coding	Actin 42A [Source:FlyBase gene name;Acc:FBgn0000043]	5687.69	-1.0534	0.00669266	2.1744	5811.41	2894.51	10071.3
FBgn0036978	Toll-9	protein_coding	Toll-9 [Source:FlyBase gene name;Acc:FBgn0036978]	407.848	-1.05314	9.51311e-05	4.02168	278.48	294.241	619.775
FBgn0032131	CG3841	protein_coding		2156.97	-1.05133	0.000376304	3.42446	1270.7	1555.03	3078.43
FBgn0037140	CG7442	protein_coding		425.23	-1.04929	0.000116876	3.93227	173.253	124.881	327.103
FBgn0000422	Ddc	protein_coding	Dopa decarboxylase [Source:FlyBase gene name;Acc:FBgn0000422]	127.193	-1.0464	0.0194678	1.71068	94.0667	99.2207	223.807
FBgn0038845	CG10827	protein_coding		10342.2	-1.04628	2.60336e-05	4.58447	3863.11	3907.24	8221.7
FBgn0034715	Oatp58Db	protein_coding	Organic anion transporting polypeptide 58Db [Source:FlyBase gene name;Acc:FBgn0034715]	567.842	-1.04593	0.000340877	3.4674	559.617	562.821	1234.17
FBgn0033981	Cyp6a21	protein_coding	Cyp6a21 [Source:FlyBase gene name;Acc:FBgn0033981]	516.537	-1.04371	0.0315912	1.50043	428.88	338.719	915.674
FBgn0029128	tyn	protein_coding	trynity [Source:FlyBase gene name;Acc:FBgn0029128]	68.1878	-1.03869	0.0286984	1.54214	22.8524	29.0819	57.0279
FBgn0033423	CG1809	protein_coding		5661.93	-1.03777	3.50246e-06	5.45563	2292.68	2039.16	4539.63
FBgn0037786	CG5361	protein_coding		92.9968	-1.03776	0.0189579	1.72221	43.0475	58.1639	110.828
FBgn0039736	CG7912	protein_coding		1111.43	-1.03668	0.00459715	2.33751	192.385	212.127	423.943
FBgn0039882	CG11576	protein_coding		1407.51	-1.03489	2.16603e-11	10.6643	939.073	1040.11	2050.85
FBgn0033733	CG8834	protein_coding		17076	-1.0338	0.00177838	2.74998	14728.6	10928	28053.4
FBgn0053120	CG33120	protein_coding		737.452	-1.0334	0.00217937	2.66167	199.825	287.398	511.099
FBgn0250836	CG8628	protein_coding		6758.32	-1.02851	0.000197258	3.70496	6577.23	5286.07	12802.2
FBgn0035173	CG13907	protein_coding		3579.29	-1.02823	1.18889e-11	10.9249	2358.58	2453.15	4975.41
FBgn0028950	CG15255	protein_coding		16218.8	-1.02526	1.15863e-07	6.93606	9134.57	7932.53	17709.8
FBgn0020762	Atet	protein_coding	ABC transporter expressed in trachea [Source:FlyBase gene name;Acc:FBgn0020762]	589.043	-1.02006	3.2619e-05	4.48653	391.147	362.669	794.086
FBgn0036485	FucTA	protein_coding	FucTA [Source:FlyBase gene name;Acc:FBgn0036485]	66.8193	-1.0192	0.020728	1.68344	43.0475	34.214	89.3078
FBgn0035670	CG10472	protein_coding		83360.8	-1.00799	2.97319e-13	12.5268	44364.4	42892.4	88607.3
FBgn0038881	CG16791	protein_coding		821.09	-1.00274	2.09506e-07	6.6788	512.318	473.865	1013.59
FBgn0025709	CG8083	protein_coding		3275.68	-1.00206	0.0166529	1.77851	1065.56	1166.7	2358.59
FBgn0033760	CG8785	protein_coding		5887.12	-1.00023	0.0149371	1.82573	3040.96	2538.68	5975.01
FBgn0250867	CG42238	protein_coding		120.486	-0.996899	0.00241889	2.61638	89.8151	82.1137	183.996
FBgn0026756	Ugt37a1	protein_coding	UDP-glycosyltransferase 37a1 [Source:FlyBase gene name;Acc:FBgn0026756]	282.397	-0.996624	0.0378154	1.42233	315.15	248.052	658.51
FBgn0050151	CG30151	protein_coding		78.3658	-0.995683	0.0168135	1.77434	66.9627	47.8997	130.196
FBgn0031253	CG11885	protein_coding		128.977	-0.99321	0.00458903	2.33828	68.0256	51.3211	130.196
FBgn0085481	CG34452	protein_coding		112.359	-0.991275	0.0267319	1.57297	45.1733	49.6104	101.144
FBgn0030928	CG15044	protein_coding		1316.04	-0.989982	0.0119474	1.92273	501.689	422.543	968.398
FBgn0030575	CG5321	protein_coding		164.904	-0.987586	0.0034795	2.45848	93.0038	112.906	211.971
FBgn0029828	CG6067	protein_coding		1991.1	-0.985685	0.0223796	1.65015	1667.69	1655.96	3662.7
FBgn0031741	CG11034	protein_coding		6148.84	-0.981474	0.00438578	2.35795	1141.02	2288.92	3458.26
FBgn0040342	CG3706	protein_coding		1598.18	-0.980102	8.7675e-09	8.05712	936.947	1034.97	1969.08
FBgn0043470	lambdaTry	protein_coding	lambdaTry [Source:FlyBase gene name;Acc:FBgn0043470]	7522.17	-0.976221	4.46154e-08	7.35052	3719.62	3512.07	7216.71
FBgn0010651	l(2)08717	protein_coding	lethal (2) 08717 [Source:FlyBase gene name;Acc:FBgn0010651]	3870.24	-0.973425	2.98932e-06	5.52443	2606.76	3325.61	5968.56
FBgn0062412	Ctr1B	protein_coding	Copper transporter 1B [Source:FlyBase gene name;Acc:FBgn0062412]	621.605	-0.970254	0.000391439	3.40734	495.312	432.808	952.258
FBgn0035666	Jon65Aii	protein_coding	Jonah 65Aii [Source:FlyBase gene name;Acc:FBgn0035666]	10414.7	-0.966078	0.0103731	1.98409	7134.19	7720.4	15645
FBgn0260026	CG42494	protein_coding		93.5301	-0.963457	0.0372091	1.42935	66.9627	65.0067	143.108
FBgn0035325	CG13806	protein_coding		129.784	-0.959289	0.00772309	2.11221	130.205	83.8244	231.339
FBgn0026084	cib	protein_coding	ciboulot [Source:FlyBase gene name;Acc:FBgn0026084]	3451.5	-0.958783	6.40387e-05	4.19356	2222.53	1866.38	4099.55
FBgn0011828	Pxn	protein_coding	Peroxidasin [Source:FlyBase gene name;Acc:FBgn0011828]	111.476	-0.958588	0.022651	1.64491	96.1925	90.6672	200.136
FBgn0035667	Jon65Ai	protein_coding	Jonah 65Ai [Source:FlyBase gene name;Acc:FBgn0035667]	11637.1	-0.957318	0.00140136	2.85345	9633.6	14166.3	24525.2
FBgn0004652	fru	protein_coding	fruitless [Source:FlyBase gene name;Acc:FBgn0004652]	111.801	-0.950005	0.0186337	1.7297	91.9409	92.3779	193.68
FBgn0039356	CG5039	protein_coding		79.7348	-0.948462	0.0318167	1.49734	34.0128	42.7676	77.4718
FBgn0003358	Jon99Ci	protein_coding	Jonah 99Ci [Source:FlyBase gene name;Acc:FBgn0003358]	12526.5	-0.939848	0.0166735	1.77797	6658.01	10235.1	17426.9
FBgn0031170	CG1718	protein_coding		5867.3	-0.937691	5.31935e-05	4.27414	2337.32	2646.46	4855.98
FBgn0039091	CG10182	protein_coding		2841.06	-0.936852	0.0247335	1.60671	892.305	1265.92	2161.68
FBgn0031908	CG5177	protein_coding		277.627	-0.936695	0.00215739	2.66607	264.131	253.184	524.011
FBgn0032733	CG15170	protein_coding		578.447	-0.932937	8.70249e-05	4.06036	399.119	484.129	862.95
FBgn0052107	CG32107	protein_coding		1294.29	-0.932521	0.01329	1.87648	1058.65	706.52	1832.42
FBgn0262843	CG43207	protein_coding		117.31	-0.930371	0.0106712	1.97179	71.2143	88.9565	158.172
FBgn0033443	CG1698	protein_coding		2240.42	-0.929672	0.00142661	2.8457	773.792	643.224	1386.96
FBgn0027932	Akap200	protein_coding	A kinase anchor protein 200 [Source:FlyBase gene name;Acc:FBgn0027932]	3769.13	-0.928472	0.000882809	3.05413	3232.81	2355.64	5566.13
FBgn0038292	CG3987	protein_coding		8137.58	-0.926188	7.12292e-05	4.14734	8654.14	5864.29	14289.2
FBgn0262816	CG43187	protein_coding		164.019	-0.912077	0.0238854	1.62187	206.734	119.749	347.547
FBgn0038082	CG5724	protein_coding		2369.18	-0.909234	0.000324502	3.48878	1358.39	1122.22	2402.7
FBgn0052243	CG32243	protein_coding		211.423	-0.907015	0.00121131	2.91674	123.296	121.46	237.795
FBgn0035999	CG3552	protein_coding		108.77	-0.905808	0.0288395	1.54001	43.5789	54.7425	94.6878
FBgn0038701	CG18493	protein_coding		10804	-0.903758	4.66401e-05	4.33124	9901.45	7737.51	16980.3
FBgn0036875	CG9449	protein_coding		167.967	-0.901271	0.00579828	2.2367	78.6546	70.1388	146.336
FBgn0262028	CR42839	lincRNA		368.944	-0.899287	0.00313785	2.50337	234.37	295.951	510.023
FBgn0040099	lectin-28C	protein_coding	lectin-28C [Source:FlyBase gene name;Acc:FBgn0040099]	119.432	-0.89672	0.0461649	1.33569	174.316	191.599	387.359
FBgn0250815	Jon65Aiv	protein_coding	Jonah 65Aiv [Source:FlyBase gene name;Acc:FBgn0250815]	320847	-0.893989	0.00150402	2.82275	178198	228954	391068
FBgn0003429	slo	protein_coding	slowpoke [Source:FlyBase gene name;Acc:FBgn0003429]	513.729	-0.891404	8.03658e-05	4.09493	433.132	497.814	883.394
FBgn0033048	CG7881	protein_coding		1024.93	-0.890872	3.11101e-05	4.5071	643.586	827.98	1383.73
FBgn0262508	CG43078	protein_coding		4255.77	-0.886708	6.71203e-09	8.17315	2965.49	3301.66	5857.73
FBgn0261675	Npc1b	protein_coding	Niemann-Pick type C-1b [Source:FlyBase gene name;Acc:FBgn0261675]	3100.91	-0.886439	0.00799724	2.09706	2009.41	2022.05	3898.34
FBgn0038098	CG7381	protein_coding		2047.64	-0.886417	0.0119474	1.92273	1450.86	1363.43	2740.57
FBgn0002526	LanA	protein_coding	Laminin A [Source:FlyBase gene name;Acc:FBgn0002526]	821.27	-0.884507	7.21035e-06	5.14204	767.946	658.62	1355.76
FBgn0037782	Npc2d	protein_coding	Niemann-Pick type C-2d [Source:FlyBase gene name;Acc:FBgn0037782]	2652.94	-0.882138	0.000761155	3.11853	1971.15	2297.47	4067.27
FBgn0038481	CG17475	protein_coding		2468.94	-0.881986	4.45897e-06	5.35077	1151.65	1223.15	2213.33
FBgn0039777	Jon99Fii	protein_coding	Jonah 99Fii [Source:FlyBase gene name;Acc:FBgn0039777]	30903.6	-0.87997	1.06319e-07	6.97339	34583.6	33488.7	63914.2
FBgn0002773	Mlc2	protein_coding	Myosin light chain 2 [Source:FlyBase gene name;Acc:FBgn0002773]	2789.32	-0.879826	8.73587e-08	7.05869	2596.67	2600.27	4864.58
FBgn0051233	CG31233	protein_coding		33146.6	-0.879795	0.000796863	3.09862	24466.9	23067.1	45188.7
FBgn0031968	CG7231	protein_coding		2835.11	-0.877577	2.47705e-08	7.60606	2482.94	2735.41	4862.43
FBgn0031945	CG7191	protein_coding		268.599	-0.875194	0.0107528	1.96848	79.7175	97.51	163.552
FBgn0038136	CG8774	protein_coding		7917.01	-0.875028	2.30158e-06	5.63797	5028.05	5255.28	9575.3
FBgn0037913	fabp	protein_coding	fatty acid bindin protein [Source:FlyBase gene name;Acc:FBgn0037913]	5589.22	-0.874428	1.72429e-12	11.7634	5103.52	4813.92	9187.94
FBgn0038740	CG4562	protein_coding		15822.6	-0.871542	7.29577e-05	4.13693	9368.41	11114.4	19122.6
FBgn0052407	CG32407	protein_coding		833.292	-0.869422	0.0403412	1.39425	572.372	704.809	1261.07
FBgn0051632	sens-2	protein_coding	senseless-2 [Source:FlyBase gene name;Acc:FBgn0051632]	373.408	-0.869414	0.00125443	2.90155	269.445	268.58	507.871
FBgn0002578	Kaz-m1	protein_coding	Kazal-type protease inhibitor m1 [Source:FlyBase gene name;Acc:FBgn0002578]	2876.98	-0.86703	3.03365e-08	7.51803	2395.25	2393.27	4428.81
FBgn0085261	CG34232	protein_coding		2133.35	-0.864333	9.2476e-08	7.03397	2013.67	2030.6	3743.39
FBgn0259748	CG42397	protein_coding		6864.75	-0.860971	0.00151501	2.81958	3187.11	2379.59	5163.71
FBgn0030756	CG9903	protein_coding		692.516	-0.857606	0.000435521	3.36099	550.051	533.739	1011.44
FBgn0053971	Ir62a	protein_coding	Ionotropic receptor 62a [Source:FlyBase gene name;Acc:FBgn0053971]	69.9098	-0.85745	0.0408108	1.38922	55.8023	59.8746	111.904
FBgn0034538	CG16799	protein_coding		427.395	-0.847349	0.000992197	3.0034	265.194	188.177	428.247
FBgn0034670	CG13488	protein_coding		132.71	-0.844371	0.0199723	1.69957	115.325	85.5351	196.908
FBgn0027586	CG5867	protein_coding		763.31	-0.843192	0.000350405	3.45543	713.206	703.099	1309.49
FBgn0263258	chas	protein_coding	chascon [Source:FlyBase gene name;Acc:FBgn0263258]	397.898	-0.843141	0.00036058	3.443	259.879	256.605	474.515
FBgn0261808	cu	protein_coding	curled [Source:FlyBase gene name;Acc:FBgn0261808]	877.532	-0.841338	0.00610542	2.21428	461.299	549.135	929.662
FBgn0263748	CG43673	protein_coding		4138.19	-0.840968	0.0228243	1.6416	2981.97	3619.85	6273.06
FBgn0035091	CG3829	protein_coding		219.907	-0.838274	0.00426294	2.37029	164.218	157.385	299.127
FBgn0035917	Zasp66	protein_coding	Z band alternatively spliced PDZ-motif protein 66 [Source:FlyBase gene name;Acc:FBgn0035917]	516.331	-0.837804	1.84767e-05	4.73338	445.887	463.6	827.442
FBgn0045064	bwa	protein_coding	brain washing [Source:FlyBase gene name;Acc:FBgn0045064]	358.955	-0.835396	0.00497608	2.30311	223.741	225.813	414.259
FBgn0039052	CG6733	protein_coding		1085.09	-0.832942	0.0192803	1.71489	1020.92	824.558	1742.04
FBgn0003149	Prm	protein_coding	Paramyosin [Source:FlyBase gene name;Acc:FBgn0003149]	1043.18	-0.831165	0.0017423	2.75888	856.698	819.426	1540.83
FBgn0030331	CG15221	protein_coding		256.43	-0.83004	0.0335106	1.47482	203.545	261.737	439.007
FBgn0010350	CdsA	protein_coding	CDP diglyceride synthetase [Source:FlyBase gene name;Acc:FBgn0010350]	1041.4	-0.828684	1.97437e-06	5.70457	830.125	727.048	1411.71
FBgn0035718	CG14820	protein_coding		3662.23	-0.820508	2.20668e-07	6.65626	3015.45	3101.5	5471.45
FBgn0033774	CG12374	protein_coding		512825	-0.819875	0.00626881	2.20281	268791	324327	538596
FBgn0031645	CG3036	protein_coding		4442.19	-0.818088	1.18461e-05	4.92642	2943.7	3015.97	5328.34
FBgn0051792	CG31792	protein_coding		136.667	-0.815094	0.0291773	1.53496	97.7868	128.303	205.516
FBgn0029935	CG4615	protein_coding		134.842	-0.814889	0.0284192	1.54639	96.1925	102.642	182.92
FBgn0265180	CG44245	protein_coding		282.723	-0.810847	0.00772361	2.11218	198.231	188.177	351.851
FBgn0038542	TyrR	protein_coding	Tyramine receptor [Source:FlyBase gene name;Acc:FBgn0038542]	626.308	-0.810802	0.011615	1.93498	265.194	371.222	565.975
FBgn0001145	Gs2	protein_coding	Glutamine synthetase 2 [Source:FlyBase gene name;Acc:FBgn0001145]	6649.26	-0.80877	0.00171381	2.76604	5326.73	6894.13	11049.4
FBgn0028983	Spn55B	protein_coding	Serpin 55B [Source:FlyBase gene name;Acc:FBgn0028983]	2185.22	-0.806171	1.48821e-06	5.82734	1697.98	1479.76	2823.42
FBgn0032402	CG14945	protein_coding		116.225	-0.805377	0.0288204	1.5403	110.542	124.881	216.275
FBgn0039467	CG14253	protein_coding		127.773	-0.802404	0.0476584	1.32186	86.6264	82.1137	156.02
FBgn0040813	Nplp2	protein_coding	Neuropeptide-like precursor 2 [Source:FlyBase gene name;Acc:FBgn0040813]	1357.62	-0.793937	0.0473785	1.32442	1123.49	1413.04	2349.98
FBgn0035985	Cpr67B	protein_coding	Cuticular protein 67B [Source:FlyBase gene name;Acc:FBgn0035985]	568.979	-0.790729	0.00938756	2.02745	274.228	297.662	504.643
FBgn0002789	Mp20	protein_coding	Muscle protein 20 [Source:FlyBase gene name;Acc:FBgn0002789]	1496.95	-0.788753	8.98599e-05	4.04643	1271.23	1175.25	2157.37
FBgn0034588	CG9394	protein_coding		6600.38	-0.785015	0.0142196	1.84711	2184.79	2873.98	4438.49
FBgn0040837	CG8620	protein_coding		464.995	-0.784942	0.0197937	1.70347	264.662	232.655	446.539
FBgn0045852	ham	protein_coding	hamlet [Source:FlyBase gene name;Acc:FBgn0045852]	293.799	-0.779178	0.00313785	2.50337	163.687	177.913	296.975
FBgn0035665	Jon65Aiii	protein_coding	Jonah 65Aiii [Source:FlyBase gene name;Acc:FBgn0035665]	203196	-0.772223	0.0142619	1.84582	102098	129312	202902
FBgn0040364	CG11378	protein_coding		4130.63	-0.770946	0.000959788	3.01782	2912.35	2774.76	4951.74
FBgn0042104	CG18747	protein_coding		1057.59	-0.770832	2.00545e-07	6.69779	697.263	680.859	1187.9
FBgn0030746	CG9981	protein_coding		439.884	-0.768394	0.000996351	3.00159	326.842	390.04	617.623
FBgn0265991	Zasp52	protein_coding	Z band alternatively spliced PDZ-motif protein 52 [Source:FlyBase gene name;Acc:FBgn0265991]	1712.71	-0.76679	0.000202277	3.69405	1248.38	1330.93	2230.54
FBgn0038679	CG6040	protein_coding		187.837	-0.766729	0.0113172	1.94626	199.825	201.863	356.155
FBgn0030519	CG11151	protein_coding		5197.49	-0.76386	1.09191e-05	4.96181	3234.41	3441.93	5725.38
FBgn0039151	CG13607	protein_coding		268.494	-0.763714	0.0382074	1.41785	136.583	160.806	259.315
FBgn0020907	Scp2	protein_coding	Sarcoplasmic calcium-binding protein 2 [Source:FlyBase gene name;Acc:FBgn0020907]	2479.3	-0.763383	0.0178425	1.74854	1577.34	2061.4	3197.86
FBgn0266448	CG45078	protein_coding		210.837	-0.759604	0.00393353	2.40522	197.168	203.574	348.623
FBgn0010482	l(2)01289	protein_coding	lethal (2) 01289 [Source:FlyBase gene name;Acc:FBgn0010482]	243.322	-0.757058	0.00548198	2.26106	238.621	248.052	423.943
FBgn0259938	cwo	protein_coding	clockwork orange [Source:FlyBase gene name;Acc:FBgn0259938]	1929.69	-0.755202	8.77117e-05	4.05694	1235.62	1467.78	2303.71
FBgn0004117	Tm2	protein_coding	Tropomyosin 2 [Source:FlyBase gene name;Acc:FBgn0004117]	1200.65	-0.755086	0.000380448	3.41971	1117.64	1009.31	1836.73
FBgn0004580	Cbp53E	protein_coding	Calbindin 53E [Source:FlyBase gene name;Acc:FBgn0004580]	237.595	-0.752325	0.00782572	2.10648	195.574	193.309	337.863
FBgn0085359	CG34330	protein_coding		10099	-0.749559	0.00393266	2.40531	6337.54	5315.15	9978.8
FBgn0033926	Arc1	protein_coding	Activity-regulated cytoskeleton associated protein 1 [Source:FlyBase gene name;Acc:FBgn0033926]	8266.12	-0.748947	1.41653e-05	4.84877	6287.06	5381.87	9956.2
FBgn0264695	Mhc	protein_coding	Myosin heavy chain [Source:FlyBase gene name;Acc:FBgn0264695]	3475.65	-0.747823	0.00468579	2.32922	3037.24	3055.31	5262.7
FBgn0037290	CG1124	protein_coding		508.493	-0.743159	0.00508633	2.2936	434.195	461.89	769.338
FBgn0051266	CG31266	protein_coding		1595.93	-0.741094	0.0218264	1.66102	982.12	1271.05	1937.87
FBgn0031929	CG18585	protein_coding		3423.57	-0.741044	0.00130789	2.88343	2730.59	2672.12	4609.57
FBgn0036622	CG4753	protein_coding		6234.66	-0.73777	1.33152e-07	6.87565	4528.49	4249.38	7381.34
FBgn0051974	CG31974	protein_coding		4517.5	-0.736582	0.0126307	1.89857	2605.17	2980.04	4764.52
FBgn0260942	bond	protein_coding	james bond [Source:FlyBase gene name;Acc:FBgn0260942]	421.157	-0.735536	0.00218953	2.65965	275.823	355.826	527.239
FBgn0051077	CG31077	protein_coding		3547.38	-0.735469	0.022174	1.65416	3349.73	4182.67	6554.98
FBgn0030505	NFAT	protein_coding	NFAT homolog [Source:FlyBase gene name;Acc:FBgn0030505]	755.947	-0.729519	0.031669	1.49937	493.186	583.349	919.978
FBgn0035499	Chd64	protein_coding	Chd64 [Source:FlyBase gene name;Acc:FBgn0035499]	6913.93	-0.725222	5.58026e-06	5.25335	6424.17	6009.7	10409.2
FBgn0039207	CG5789	protein_coding		1258.37	-0.724647	0.0235705	1.62763	1241.47	1286.45	2177.82
FBgn0266446	CG45076	protein_coding		349.921	-0.722752	0.023441	1.63002	322.059	299.373	533.695
FBgn0050043	CG30043	protein_coding		815.367	-0.722724	0.0138338	1.85906	606.385	841.665	1225.56
FBgn0011555	thetaTry	protein_coding	thetaTrypsin [Source:FlyBase gene name;Acc:FBgn0011555]	10157.8	-0.721388	0.0081032	2.09134	7535.43	10324.1	15135
FBgn0004169	up	protein_coding	upheld [Source:FlyBase gene name;Acc:FBgn0004169]	1672.85	-0.721129	0.00117536	2.92983	1476.9	1418.17	2436.06
FBgn0051198	CG31198	protein_coding		87315.4	-0.719408	4.59648e-06	5.33758	65371	59534.1	103785
FBgn0032087	CG9568	protein_coding		11912.1	-0.718274	0.0182488	1.73877	7495.57	7629.73	12778.5
FBgn0015039	Cyp9b2	protein_coding	Cytochrome P450-9b2 [Source:FlyBase gene name;Acc:FBgn0015039]	6162.62	-0.716125	0.00268713	2.57071	5055.69	5248.43	8654.25
FBgn0031069	Pmp70	protein_coding		9245.75	-0.713378	0.00130402	2.88472	5310.78	5804.41	9227.75
FBgn0030600	hiw	protein_coding	highwire [Source:FlyBase gene name;Acc:FBgn0030600]	2416.23	-0.709679	0.00672529	2.17229	1907.38	2013.5	3282.87
FBgn0035517	CG1265	protein_coding		718.664	-0.704537	0.000221933	3.65378	601.07	554.268	959.79
FBgn0025697	santa-maria	protein_coding	scavenger receptor acting in neural tissue and majority of rhodopsin is absent [Source:FlyBase gene name;Acc:FBgn0025697]	579.484	-0.702229	0.0119474	1.92273	360.855	417.411	642.37
FBgn0261800	LanB1	protein_coding	LanB1 [Source:FlyBase gene name;Acc:FBgn0261800]	505.784	-0.699487	0.0048595	2.31341	589.91	456.757	882.318
FBgn0000042	Act5C	protein_coding	Actin 5C [Source:FlyBase gene name;Acc:FBgn0000042]	66508.2	-0.699152	0.000170409	3.76851	62705.3	52159.3	94617.8
FBgn0261565	Lmpt	protein_coding	Limpet [Source:FlyBase gene name;Acc:FBgn0261565]	1187.91	-0.692259	2.22928e-05	4.65184	798.238	802.319	1304.11
FBgn0036381	CG8745	protein_coding		5124.85	-0.691685	0.0424699	1.37192	4029.46	5308.31	7838.64
FBgn0011672	Mvl	protein_coding	Malvolio [Source:FlyBase gene name;Acc:FBgn0011672]	2909.24	-0.690596	0.00207966	2.68201	2558.93	2868.85	4464.31
FBgn0030479	Rbp1-like	protein_coding	Rbp1-like [Source:FlyBase gene name;Acc:FBgn0030479]	351.16	-0.689653	0.0077621	2.11002	237.558	290.819	428.247
FBgn0032336	AstC	protein_coding	Allatostatin C [Source:FlyBase gene name;Acc:FBgn0032336]	1117.98	-0.686673	0.000324502	3.48878	623.391	750.998	1107.2
FBgn0031801	CG9498	protein_coding		2259.84	-0.686468	0.00304893	2.51585	2157.69	2393.27	3744.47
FBgn0027572	CG5009	protein_coding		1036.19	-0.686305	0.00284179	2.54641	696.731	804.03	1221.26
FBgn0031969	pes	protein_coding	peste [Source:FlyBase gene name;Acc:FBgn0031969]	3162.35	-0.68613	6.1821e-05	4.20886	2305.43	2122.98	3602.44
FBgn0263593	Lpin	protein_coding	Lipin [Source:FlyBase gene name;Acc:FBgn0263593]	5137	-0.682683	6.6922e-08	7.17443	3599.51	3512.07	5741.52
FBgn0026562	BM-40-SPARC	protein_coding	BM-40-SPARC [Source:FlyBase gene name;Acc:FBgn0026562]	235.736	-0.682265	0.044556	1.35109	254.565	277.134	444.387
FBgn0028550	Atf3	protein_coding	Activating transcription factor 3 [Source:FlyBase gene name;Acc:FBgn0028550]	1395.65	-0.675546	0.00888443	2.05137	998.064	1017.87	1639.82
FBgn0040336	Seipin	protein_coding	Seipin [Source:FlyBase gene name;Acc:FBgn0040336]	1327.37	-0.67534	0.016839	1.77368	755.191	841.665	1294.42
FBgn0052115	CG32115	protein_coding		412.391	-0.669305	0.0284134	1.54648	364.575	348.983	586.419
FBgn0034145	CG5065	protein_coding		2066.69	-0.668553	0.00772361	2.11218	1464.15	1582.4	2461.88
FBgn0015568	alpha-Est1	protein_coding	alpha-Esterase-1 [Source:FlyBase gene name;Acc:FBgn0015568]	1195.19	-0.666622	0.00940247	2.02676	543.142	542.293	870.482
FBgn0051265	CG31265	protein_coding		1211.44	-0.666143	0.00284849	2.54538	707.892	858.772	1250.31
FBgn0016926	Pino	protein_coding	Pinocchio [Source:FlyBase gene name;Acc:FBgn0016926]	2982.53	-0.661735	0.0154187	1.81195	2271.42	2379.59	3757.38
FBgn0052687	CG32687	protein_coding		4517.53	-0.6614	0.000122524	3.91178	3035.64	3027.94	4836.61
FBgn0005612	Sox14	protein_coding	Sox box protein 14 [Source:FlyBase gene name;Acc:FBgn0005612]	649.511	-0.659839	0.00854701	2.06819	614.888	578.217	966.246
FBgn0004028	wupA	protein_coding	wings up A [Source:FlyBase gene name;Acc:FBgn0004028]	1298.69	-0.657146	0.00213175	2.67126	1096.38	1132.48	1784
FBgn0036043	CG8177	protein_coding		3868.85	-0.656808	0.000297273	3.52684	2794.37	3128.87	4712.87
FBgn0264975	Nrg	protein_coding	Neuroglian [Source:FlyBase gene name;Acc:FBgn0264975]	599.661	-0.653766	0.0270547	1.56776	497.969	499.525	805.922
FBgn0029804	CG3097	protein_coding		595.895	-0.647763	0.0328926	1.4829	375.735	461.89	664.966
FBgn0039760	CG9682	protein_coding		2632.96	-0.64745	2.34728e-05	4.62944	1635.27	1560.16	2522.14
FBgn0014857	His3.3A	protein_coding	Histone H3.3A [Source:FlyBase gene name;Acc:FBgn0014857]	1802.9	-0.64365	0.00191715	2.71734	1300.99	1158.15	1948.63
FBgn0030688	CG8952	protein_coding		6588.24	-0.638054	0.0044138	2.35519	4003.41	4302.42	6532.38
FBgn0014863	Mlp84B	protein_coding	Muscle LIM protein at 84B [Source:FlyBase gene name;Acc:FBgn0014863]	560.247	-0.637483	0.00418645	2.37815	559.086	644.935	949.03
FBgn0039427	CG5447	protein_coding		477.072	-0.637385	0.00508209	2.29396	417.188	359.247	619.775
FBgn0036194	CG11652	protein_coding		438.52	-0.635936	0.00772361	2.11218	382.113	304.505	550.911
FBgn0012037	Ance	protein_coding	Angiotensin converting enzyme [Source:FlyBase gene name;Acc:FBgn0012037]	14113.3	-0.635768	4.11118e-05	4.38603	9442.28	10190.7	15353.4
FBgn0032167	CG5853	protein_coding		5906	-0.629701	0.00020413	3.69009	4086.85	4427.3	6635.68
FBgn0032144	CG17633	protein_coding		45957	-0.628835	0.0301187	1.52116	24994.6	28996.4	42371.7
FBgn0086901	cv-c	protein_coding	crossveinless c [Source:FlyBase gene name;Acc:FBgn0086901]	1219.64	-0.628581	0.0144162	1.84115	1165.47	1038.4	1744.19
FBgn0003943	Ubi-p63E	protein_coding	Ubiquitin-63E [Source:FlyBase gene name;Acc:FBgn0003943]	1921.87	-0.628301	0.0101308	1.99435	1742.09	1698.73	2714.74
FBgn0085446	CG34417	protein_coding		3513.59	-0.624721	0.0477443	1.32108	2493.03	2834.63	4200.69
FBgn0265042	Irk1	protein_coding	Inwardly rectifying potassium channel 1 [Source:FlyBase gene name;Acc:FBgn0265042]	2807.33	-0.623756	0.037073	1.43094	2139.62	2579.74	3719.72
FBgn0036999	isoQC	protein_coding	iso Glutaminyl cyclase [Source:FlyBase gene name;Acc:FBgn0036999]	506.532	-0.621091	0.00772361	2.11218	418.251	366.09	617.623
FBgn0264089	sli	protein_coding	slit [Source:FlyBase gene name;Acc:FBgn0264089]	793.654	-0.617152	0.00530839	2.27504	500.626	448.204	740.286
FBgn0030318	rho-4	protein_coding	rhomboid-4 [Source:FlyBase gene name;Acc:FBgn0030318]	1485.78	-0.61628	0.00610542	2.21428	1370.08	1120.51	1948.63
FBgn0035154	CG3344	protein_coding		9329.01	-0.615865	0.0120255	1.9199	6709.56	6091.81	9950.82
FBgn0052473	CG32473	protein_coding		11008.8	-0.613658	5.29614e-05	4.27604	6680.33	6957.43	10484.5
FBgn0035169	CG13890	protein_coding		226.757	-0.612933	0.034501	1.46217	223.741	248.052	367.991
FBgn0035375	pgant6	protein_coding	polypeptide GalNAc transferase 6 [Source:FlyBase gene name;Acc:FBgn0035375]	2080.36	-0.611426	0.00082351	3.08433	1933.42	1804.79	2893.36
FBgn0035926	CG5804	protein_coding		11442.7	-0.608042	0.00565915	2.24725	10742.7	8745.11	15090.9
FBgn0261794	kcc	protein_coding	kazachoc [Source:FlyBase gene name;Acc:FBgn0261794]	3827.03	-0.603451	0.0180552	1.7434	2824.13	2408.67	4034.99
FBgn0011834	Ser6	protein_coding	Serine protease 6 [Source:FlyBase gene name;Acc:FBgn0011834]	2190.8	-0.603311	0.0239572	1.62056	764.225	817.716	1201.89
FBgn0036752	Adgf-A	protein_coding	Adenosine deaminase-related growth factor A [Source:FlyBase gene name;Acc:FBgn0036752]	3283.35	-0.603277	0.0225871	1.64614	2126.33	2389.85	3479.78
FBgn0052512	CG32512	protein_coding		737.879	-0.60282	0.0108361	1.96513	732.87	768.105	1159.93
FBgn0051720	mthl15	protein_coding	methuselah-like 15 [Source:FlyBase gene name;Acc:FBgn0051720]	757.129	-0.602741	0.00109573	2.96029	606.385	549.135	892.002
FBgn0031990	CG8552	protein_coding		2747.13	-0.600251	0.00011616	3.93494	2685.95	2615.66	4058.66
FBgn0030775	CG9673	protein_coding		11389	-0.600229	0.000753205	3.12309	7025.24	7214.03	10862.2
FBgn0037242	CG9855	protein_coding		431.471	-0.599129	0.0133066	1.87593	300.269	258.316	433.627
FBgn0035438	PHGPx	protein_coding	PHGPx [Source:FlyBase gene name;Acc:FBgn0035438]	2170.32	-0.598267	0.000600443	3.22153	2135.9	2276.94	3376.48
FBgn0034716	Oatp58Dc	protein_coding	Organic anion transporting polypeptide 58Dc [Source:FlyBase gene name;Acc:FBgn0034716]	3127.11	-0.596206	0.0315092	1.50156	2432.45	2819.24	4043.6
FBgn0053080	CG33080	protein_coding		1980.52	-0.5956	0.0290915	1.53623	1357.86	1609.77	2274.66
FBgn0039316	CG11893	protein_coding		904.148	-0.595002	0.0342465	1.46538	220.02	150.542	288.367

## Sheet: Myo Up p≤0.001
Gene	Associated Gene Name	Gene type	Description	baseMean	log2FoldChange	padj	Transformed Padj	Myo_MPCi_1	Myo_MPCi_2	Myo_MPCi_3	mcherryi_myo_1	mcherryi_myo_3
FBgn0034317	CG14499	protein_coding		3942.22	5.48804	4.70199e-43	42.3277	10382.8	8696.85	11750.1	60.2773	63.4188
FBgn0036948	CG7298	protein_coding		10160.7	4.82344	8.22006e-136	135.085	9712.41	15403.6	14449.7	398.926	394.028
FBgn0052368	CG32368	protein_coding		3507.88	4.49525	4.43748e-29	28.3529	4041.73	3258.32	4417.84	26.3028	38.4671
FBgn0264272	mwh	protein_coding	multiple wing hairs [Source:FlyBase gene name;Acc:FBgn0264272]	1550.34	4.46624	5.47034e-67	66.262	502.13	835.22	779.475	23.015	16.6344
FBgn0032002	CG8353	protein_coding		1339.17	4.35163	1.20012e-58	57.9208	2118.27	2291.57	2959.39	87.676	86.2912
FBgn0043791	CG8147	protein_coding		477.949	4.32873	6.00018e-28	27.2218	190.242	337.928	178.119	2.1919	1.03965
FBgn0034047	CG12970	protein_coding		168.039	3.98506	6.80564e-32	31.1671	292.68	486.732	628.319	15.3433	22.8724
FBgn0001225	Hsp26	protein_coding	Heat shock protein 26 [Source:FlyBase gene name;Acc:FBgn0001225]	905.026	3.83171	4.28527e-19	18.368	972.247	2065.97	2935.7	39.4542	54.0619
FBgn0053532	lectin-37Da	protein_coding	lectin-37Da [Source:FlyBase gene name;Acc:FBgn0053532]	6162.72	3.78651	5.21488e-22	21.2828	9845.95	8748.69	9253.2	282.755	278.627
FBgn0262366	CG43064	protein_coding		875.309	3.75747	4.70439e-39	38.3275	1238.4	1371.87	1326.91	54.7975	83.1722
FBgn0044812	TotC	protein_coding	Turandot C [Source:FlyBase gene name;Acc:FBgn0044812]	130.439	3.71256	3.32026e-25	24.4788	176.523	116.163	144.62	6.5757	3.11896
FBgn0030904	upd2	protein_coding	unpaired 2 [Source:FlyBase gene name;Acc:FBgn0030904]	49.7267	3.70953	2.42685e-19	18.615	110.67	116.163	121.742	4.3838	2.07931
FBgn0264295	CG43773	protein_coding		212.661	3.62031	1.0547e-31	30.9769	418.899	240.006	298.227	14.2474	20.7931
FBgn0034187	CG6967	protein_coding		1518.93	3.59581	5.10823e-15	14.2917	4185.33	3075.91	3077.86	74.5246	60.2999
FBgn0264987	CR44138	lincRNA		944.566	3.52551	9.49503e-18	17.0225	766.457	1655.08	2714.27	63.5651	77.9739
FBgn0052198	CG32198	protein_coding		95.5465	3.48248	1.207e-16	15.9183	70.4262	94.0823	57.1942	3.28785	1.03965
FBgn0054005	CG34005	protein_coding		191.265	3.37687	1.28368e-33	32.8915	277.132	402.25	500.858	24.1109	34.3085
FBgn0053958	CG33958	protein_coding		43.4244	3.32054	1.66772e-14	13.7779	79.5725	77.7619	102.132	0	4.15861
FBgn0052224	CR32224	lincRNA		53.8668	3.32008	3.07135e-13	12.5127	27.4388	84.482	81.706	1.09595	0
FBgn0033789	CG13324	protein_coding		2817.62	3.31796	3.75035e-69	68.4259	3817.65	3794.97	4239.72	329.881	383.632
FBgn0036952	CG6933	protein_coding		441.187	3.2991	1.77761e-29	28.7502	243.291	420.49	495.955	26.3028	28.0706
FBgn0053503	Cyp12d1-d	protein_coding	Cyp12d1-d [Source:FlyBase gene name;Acc:FBgn0053503]	23.9495	3.28469	6.51794e-12	11.1859	22.8657	48.9612	49.0236	0	0
FBgn0053542	upd3	protein_coding	unpaired 3 [Source:FlyBase gene name;Acc:FBgn0053542]	159.574	3.23779	1.30521e-17	16.8843	259.754	291.847	328.458	10.9595	22.8724
FBgn0034712	CG3264	protein_coding		391.825	3.20426	6.52148e-11	10.1857	248.778	726.737	544.162	4.3838	2.07931
FBgn0267727	Pen	protein_coding	Pendulin [Source:FlyBase gene name;Acc:FBgn0267727]	111.535	3.20264	2.88697e-14	13.5396	290.851	160.324	173.217	7.67165	10.3965
FBgn0001230	Hsp68	protein_coding	Heat shock protein 68 [Source:FlyBase gene name;Acc:FBgn0001230]	459.853	3.17216	2.14422e-10	9.66873	475.606	1172.19	1495.22	3.28785	15.5948
FBgn0264775	CG44013	protein_coding		1454.72	3.16626	7.8733e-50	49.1038	3056.68	4020.58	5221.01	383.583	447.051
FBgn0030270	CG15199	protein_coding		1084.2	3.13265	1.50283e-13	12.8231	4338.07	1665.64	1700.3	136.994	173.622
FBgn0001226	Hsp27	protein_coding	Heat shock protein 27 [Source:FlyBase gene name;Acc:FBgn0001226]	158.202	3.12113	1.17806e-23	22.9288	277.132	298.567	418.335	27.3988	30.1499
FBgn0039972	CG17018	protein_coding		75.6042	3.11357	1.28352e-12	11.8916	224.083	124.803	254.923	12.0555	12.4758
FBgn0052107	CG32107	protein_coding		1294.29	3.1023	1.88604e-40	39.7244	1836.57	2162.93	1933.16	176.448	218.327
FBgn0036362	CG10725	protein_coding		2011.44	3.03679	3.43495e-52	51.4641	411.582	502.092	522.101	44.934	50.943
FBgn0086675	fne	protein_coding	found in neurons [Source:FlyBase gene name;Acc:FBgn0086675]	56.1649	2.98956	8.77548e-09	8.05673	5.48776	269.766	310.483	4.3838	9.35687
FBgn0037562	CG11671	protein_coding		3193.37	2.98587	1.58127e-53	52.801	4911.54	4663.79	5367.27	497.561	646.664
FBgn0260437	CR42532	pseudogene		135.452	2.94049	1.33692e-31	30.8739	286.278	268.806	318.653	30.6866	34.3085
FBgn0003082	phr	protein_coding	photorepair [Source:FlyBase gene name;Acc:FBgn0003082]	68.3767	2.92341	1.64968e-16	15.7826	115.243	102.722	117.657	14.2474	6.23792
FBgn0030241	feo	protein_coding	fascetto [Source:FlyBase gene name;Acc:FBgn0030241]	36.6768	2.92246	3.32139e-12	11.4787	85.9748	67.2016	53.926	4.3838	3.11896
FBgn0011703	RnrL	protein_coding	Ribonucleoside diphosphate reductase large subunit [Source:FlyBase gene name;Acc:FBgn0011703]	217.217	2.91588	1.35133e-20	19.8692	379.57	288.967	294.959	21.919	39.5068
FBgn0085480	CG34451	protein_coding		58.5852	2.90484	4.0972e-14	13.3875	73.1701	85.442	95.596	4.3838	10.3965
FBgn0052283	Drsl3	protein_coding	Drosomycin-like 3 [Source:FlyBase gene name;Acc:FBgn0052283]	57.0047	2.8982	1.39084e-11	10.8567	64.9384	68.1616	105.401	1.09595	8.31722
FBgn0260933	rempA	protein_coding	reduced mechanoreceptor potential A [Source:FlyBase gene name;Acc:FBgn0260933]	200.322	2.86416	7.54955e-19	18.1221	421.643	306.247	319.47	27.3988	42.6258
FBgn0031490	CG17264	protein_coding		669.487	2.84634	7.31551e-13	12.1358	745.42	1031.06	983.74	74.5246	64.4585
FBgn0040367	CG11382	protein_coding		13.2222	2.82763	2.18878e-08	7.6598	21.951	36.4809	40.853	1.09595	0
FBgn0015316	Try29F	protein_coding	Trypsin 29F [Source:FlyBase gene name;Acc:FBgn0015316]	359.47	2.82	3.15448e-24	23.5011	1125.9	655.696	710.025	94.2517	108.124
FBgn0001224	Hsp23	protein_coding	Heat shock protein 23 [Source:FlyBase gene name;Acc:FBgn0001224]	1056.64	2.81662	5.43012e-08	7.26519	763.713	2874.31	3932.51	15.3433	17.6741
FBgn0000043	Act42A	protein_coding	Actin 42A [Source:FlyBase gene name;Acc:FBgn0000043]	5687.69	2.81194	5.24785e-31	30.28	8817.91	9645.35	11019.7	1026.91	1399.37
FBgn0036951	CG7017	protein_coding		89.1143	2.76053	3.4249e-09	8.46535	171.95	96.0023	91.5107	3.28785	4.15861
FBgn0005655	PCNA	protein_coding	Proliferating cell nuclear antigen [Source:FlyBase gene name;Acc:FBgn0005655]	101.761	2.75878	5.24035e-16	15.2806	176.523	142.083	170.766	13.1514	19.7534
FBgn0033065	Cyp6w1	protein_coding	Cyp6w1 [Source:FlyBase gene name;Acc:FBgn0033065]	359.296	2.71291	2.28023e-34	33.642	428.045	450.251	410.981	74.5246	42.6258
FBgn0052279	Drsl2	protein_coding	Drosomycin-like 2 [Source:FlyBase gene name;Acc:FBgn0052279]	119.867	2.69009	2.68572e-07	6.57094	128.962	304.327	466.541	2.1919	7.27757
FBgn0004431	LysX	protein_coding	Lysozyme X [Source:FlyBase gene name;Acc:FBgn0004431]	1542.99	2.66271	7.7456e-13	12.1109	1758.83	2897.35	3805.05	266.316	342.046
FBgn0031169	CG1494	protein_coding		22.8277	2.65222	4.79309e-08	7.31938	42.0728	37.4409	16.3412	2.1919	0
FBgn0035743	CG15829	protein_coding		785.123	2.57782	3.98308e-18	17.3998	1043.59	1130.91	1477.24	172.064	156.988
FBgn0038832	CG15695	protein_coding		201.922	2.57343	1.19252e-21	20.9235	354.875	536.653	437.944	43.838	86.2912
FBgn0266420	Ote	protein_coding	Otefin [Source:FlyBase gene name;Acc:FBgn0266420]	60.3825	2.5693	1.55126e-14	13.8093	103.353	96.9623	89.0595	12.0555	11.4362
FBgn0001086	fzy	protein_coding	fizzy [Source:FlyBase gene name;Acc:FBgn0001086]	22.4374	2.56501	1.02949e-08	7.98738	50.3044	43.201	32.6824	3.28785	2.07931
FBgn0010038	GstD2	protein_coding	Glutathione S transferase D2 [Source:FlyBase gene name;Acc:FBgn0010038]	271.558	2.56025	4.77431e-11	10.3211	83.231	103.682	126.644	5.47975	7.27757
FBgn0031432	Cyp309a1	protein_coding	Cyp309a1 [Source:FlyBase gene name;Acc:FBgn0031432]	1235.44	2.55875	8.10959e-25	24.091	1501.82	906.262	725.549	136.994	168.424
FBgn0033205	CG2064	protein_coding		2682.6	2.5472	1.1384e-49	48.9437	4063.68	3502.16	3208.59	540.303	611.316
FBgn0262794	CG43175	protein_coding		16.43	2.53937	2.52229e-07	6.5982	34.7558	22.0805	30.2312	0	0
FBgn0052284	CG32284	protein_coding		1149.21	2.53874	7.24509e-23	22.14	795.725	1197.15	1734.62	173.16	208.97
FBgn0034711	CG3290	protein_coding		14597.4	2.50353	1.7729e-50	49.7513	15476.4	23502.3	17566	3105.92	3185.5
FBgn0050082	CG30082	protein_coding		18.4993	2.5017	2.34686e-07	6.62951	28.3534	31.6808	38.4018	1.09595	1.03965
FBgn0262007	CG42825	protein_coding		9034.86	2.47811	8.41548e-10	9.07492	16024.2	15736.7	15225.1	1744.75	1934.79
FBgn0051901	Mur29B	protein_coding	Mucin related 29B [Source:FlyBase gene name;Acc:FBgn0051901]	9857.9	2.47632	4.07539e-36	35.3898	17516	16302.2	19753.2	2918.52	3034.75
FBgn0035282	CNMa	protein_coding	CNMamide [Source:FlyBase gene name;Acc:FBgn0035282]	303.475	2.44602	1.16764e-06	5.93269	198.474	893.781	625.868	38.3583	42.6258
FBgn0004106	Cdk1	protein_coding	Cyclin-dependent kinase 1 [Source:FlyBase gene name;Acc:FBgn0004106]	22.1516	2.44528	3.6262e-07	6.44055	52.1337	22.0805	40.853	0	3.11896
FBgn0034293	CG14495	protein_coding		1289.67	2.41108	2.46195e-26	25.6087	1826.51	2559.42	3126.89	393.446	463.685
FBgn0031878	sip2	protein_coding	septin interacting protein 2 [Source:FlyBase gene name;Acc:FBgn0031878]	32.1883	2.37454	4.10001e-09	8.38721	60.3653	60.4815	54.743	3.28785	10.3965
FBgn0052302	CG32302	protein_coding		2187.58	2.36437	1.24982e-32	31.9032	2905.77	3699.93	4466.87	568.798	802.612
FBgn0013772	Cyp6a8	protein_coding	Cytochrome P450-6a8 [Source:FlyBase gene name;Acc:FBgn0013772]	609.495	2.36339	2.95534e-14	13.5294	674.079	456.971	271.264	80.0044	64.4585
FBgn0040251	Ugt86Di	protein_coding	Ugt86Di [Source:FlyBase gene name;Acc:FBgn0040251]	75.2013	2.36107	5.11851e-12	11.2909	155.486	116.163	89.8766	18.6312	16.6344
FBgn0020633	Mcm7	protein_coding	Minichromosome maintenance 7 [Source:FlyBase gene name;Acc:FBgn0020633]	64.3833	2.35714	7.97844e-12	11.0981	106.097	99.8424	107.852	16.4393	13.5155
FBgn0267758	CR46089	lincRNA		22.4258	2.35644	2.52229e-07	6.5982	27.4388	36.4809	39.2189	2.1919	3.11896
FBgn0038608	WRNexo	protein_coding	WRN exonuclease [Source:FlyBase gene name;Acc:FBgn0038608]	35.6537	2.3509	2.12109e-07	6.67344	61.2799	59.5214	53.1089	4.3838	5.19826
FBgn0016675	Lectin-galC1	protein_coding	Galactose-specific C-type lectin [Source:FlyBase gene name;Acc:FBgn0016675]	48.5901	2.3479	1.39065e-06	5.85678	103.353	57.6014	35.1336	0	6.23792
FBgn0024920	Ts	protein_coding	Ts [Source:FlyBase gene name;Acc:FBgn0024920]	33.2431	2.34082	5.47542e-08	7.26158	55.7922	48.9612	48.2065	3.28785	6.23792
FBgn0086356	tum	protein_coding	tumbleweed [Source:FlyBase gene name;Acc:FBgn0086356]	29.6636	2.33767	2.66177e-07	6.57483	85.0602	42.241	57.1942	4.3838	8.31722
FBgn0266428	CR43463	lincRNA		47.0707	2.33237	6.18606e-08	7.20859	55.7922	56.6414	45.7554	4.3838	8.31722
FBgn0036323	CG14118	protein_coding		113.169	2.31337	2.88697e-14	13.5396	165.547	236.166	154.424	24.1109	37.4275
FBgn0017577	Mcm5	protein_coding	Minichromosome maintenance 5 [Source:FlyBase gene name;Acc:FBgn0017577]	43.3999	2.30195	6.16533e-09	8.21004	74.0847	64.3215	83.3401	6.5757	12.4758
FBgn0004635	rho	protein_coding	rhomboid [Source:FlyBase gene name;Acc:FBgn0004635]	53.156	2.30006	2.66177e-07	6.57483	86.8895	138.243	129.095	6.5757	21.8327
FBgn0259237	CG42335	protein_coding		1598.06	2.29864	5.94796e-30	29.2256	2266.44	2851.27	2712.64	506.329	480.32
FBgn0051344	CG31344	protein_coding		153.84	2.28941	2.37791e-15	14.6238	199.388	235.206	276.166	29.5907	50.943
FBgn0033541	CG12934	protein_coding		251.644	2.28336	5.87607e-24	23.2309	225.913	299.527	276.166	55.8935	41.5861
FBgn0034296	CG10912	protein_coding		26537.9	2.27747	2.23924e-24	23.6499	33532	41328	43095.8	6480.35	8297.47
FBgn0267635	CR45973	lincRNA		13.3904	2.26532	3.37898e-06	5.47121	24.6949	28.8007	35.9506	3.28785	2.07931
FBgn0085265	CG34236	protein_coding		679.526	2.26322	2.86762e-32	31.5425	1228.34	987.864	1211.7	238.917	206.891
FBgn0032023	CG14274	protein_coding		15.2828	2.26082	6.1707e-06	5.20967	17.3779	26.8806	45.7554	2.1919	1.03965
FBgn0039184	CG6432	protein_coding		28.6954	2.23701	8.93689e-06	5.04881	73.1701	27.8407	14.7071	0	2.07931
FBgn0263353	CG11000	protein_coding		28.5812	2.23597	3.79427e-06	5.42087	89.6334	50.8812	26.1459	7.67165	4.15861
FBgn0262008	CG42826	protein_coding		23.3826	2.23409	1.75432e-06	5.75589	42.0728	55.6813	55.5601	9.86355	2.07931
FBgn0262148	CR42874	lincRNA		19.7553	2.23361	1.61993e-05	4.7905	10.9755	46.0811	65.3648	1.09595	2.07931
FBgn0263076	Klp54D	protein_coding	Kinesin-like protein at 54D [Source:FlyBase gene name;Acc:FBgn0263076]	6.44123	2.2282	2.22289e-05	4.65308	21.951	16.3204	14.7071	0	0
FBgn0260932	cuff	protein_coding	cutoff [Source:FlyBase gene name;Acc:FBgn0260932]	40.5638	2.2281	3.29851e-10	9.48168	75.914	96.0023	102.132	17.5352	14.5551
FBgn0036411	Sox21a	protein_coding	Sox21a [Source:FlyBase gene name;Acc:FBgn0036411]	232.297	2.2102	1.96766e-12	11.7061	481.093	389.769	410.164	59.1813	93.5687
FBgn0000473	Cyp6a2	protein_coding	Cytochrome P450-6a2 [Source:FlyBase gene name;Acc:FBgn0000473]	378.932	2.19009	7.73665e-15	14.1114	558.837	382.089	300.678	84.3882	68.6171
FBgn0052072	Elo68alpha	protein_coding	Elongase 68alpha [Source:FlyBase gene name;Acc:FBgn0052072]	20.9353	2.19001	1.9091e-06	5.71917	24.6949	28.8007	25.3289	1.09595	2.07931
FBgn0262816	CG43187	protein_coding		164.019	2.18885	3.25546e-16	15.4874	224.998	244.806	272.081	39.4542	54.0619
FBgn0011692	pav	protein_coding	pavarotti [Source:FlyBase gene name;Acc:FBgn0011692]	30.5268	2.18465	2.89377e-07	6.53854	68.597	61.4415	59.6454	10.9595	7.27757
FBgn0053926	CG33926	protein_coding		4789.83	2.18283	1.02989e-17	16.9872	8075.23	7551.54	9139.63	1640.64	1607.3
FBgn0034710	CG3292	protein_coding		27.6717	2.17954	5.42456e-07	6.26564	47.5606	38.4009	33.4995	5.47975	4.15861
FBgn0004872	piwi	protein_coding	piwi [Source:FlyBase gene name;Acc:FBgn0004872]	34.1497	2.17448	1.64352e-06	5.78423	74.9993	31.6808	46.5724	4.3838	6.23792
FBgn0032105	borr	protein_coding	borealin-related [Source:FlyBase gene name;Acc:FBgn0032105]	19.4137	2.17157	9.55977e-06	5.01955	53.0483	35.5209	38.4018	2.1919	6.23792
FBgn0003124	polo	protein_coding	polo [Source:FlyBase gene name;Acc:FBgn0003124]	60.0118	2.16932	1.76304e-06	5.75374	193.901	83.522	89.0595	16.4393	15.5948
FBgn0039694	fig	protein_coding	fos intronic gene [Source:FlyBase gene name;Acc:FBgn0039694]	30.6189	2.16059	3.88477e-07	6.41064	40.2435	46.0811	62.0966	5.47975	7.27757
FBgn0037975	CG3397	protein_coding		69.7882	2.15225	4.61565e-07	6.33577	31.0973	26.8806	18.7924	1.09595	0
FBgn0004644	hh	protein_coding	hedgehog [Source:FlyBase gene name;Acc:FBgn0004644]	260.985	2.14926	9.87118e-17	16.0056	299.083	476.171	497.589	75.6206	93.5687
FBgn0035887	Jon66Cii	protein_coding	Jonah 66Cii [Source:FlyBase gene name;Acc:FBgn0035887]	398.502	2.14391	1.1726e-06	5.93085	781.091	770.898	860.364	108.499	141.393
FBgn0262607	CG43133	protein_coding		8.63461	2.14019	4.77472e-05	4.32105	22.8657	12.4803	17.9753	0	1.03965
FBgn0037853	CG14696	protein_coding		199.994	2.13927	4.71129e-11	10.3269	421.643	311.047	299.861	48.2218	79.0136
FBgn0036953	CG17145	protein_coding		53.1285	2.13203	1.19696e-06	5.92192	27.4388	24.9606	28.5971	2.1919	0
FBgn0033978	Cyp6a23	protein_coding	Cyp6a23 [Source:FlyBase gene name;Acc:FBgn0033978]	7367.94	2.11867	1.44059e-72	71.8415	10267.6	10626.5	9374.95	2268.62	2289.32
FBgn0034670	CG13488	protein_coding		132.71	2.11213	5.04933e-19	18.2968	224.998	252.486	236.947	43.838	56.1412
FBgn0034709	Swim	protein_coding	Secreted Wg-interacting molecule [Source:FlyBase gene name;Acc:FBgn0034709]	1027.05	2.10792	5.49455e-23	22.2601	2082.6	1813.48	2128.44	385.774	482.399
FBgn0002466	sti	protein_coding	sticky [Source:FlyBase gene name;Acc:FBgn0002466]	39.4954	2.08652	2.80967e-08	7.55134	74.9993	66.2416	67.816	8.7676	15.5948
FBgn0036225	CG5883	protein_coding		29.7874	2.08467	4.63816e-06	5.33365	54.8776	27.8407	31.8653	5.47975	2.07931
FBgn0003888	betaTub60D	protein_coding	beta-Tubulin at 60D [Source:FlyBase gene name;Acc:FBgn0003888]	2080.14	2.08306	1.44449e-18	17.8403	3718.87	3754.65	4475.04	652.09	1069.8
FBgn0033438	Mmp2	protein_coding	Matrix metalloproteinase 2 [Source:FlyBase gene name;Acc:FBgn0033438]	356.731	2.06456	2.66705e-19	18.574	639.324	534.733	622.6	110.691	151.789
FBgn0031489	CG17224	protein_coding		3068.71	2.06386	4.28527e-19	18.368	3974.05	4482.35	4193.97	915.118	924.251
FBgn0040232	cmet	protein_coding	CENP-meta [Source:FlyBase gene name;Acc:FBgn0040232]	37.9312	2.0602	9.6659e-06	5.01476	82.3163	79.6819	67.816	7.67165	13.5155
FBgn0025815	Mcm6	protein_coding	Minichromosome maintenance 6 [Source:FlyBase gene name;Acc:FBgn0025815]	106.761	2.04939	1.17121e-14	13.9314	175.608	148.804	165.863	35.0704	34.3085
FBgn0010044	GstD8	protein_coding	Glutathione S transferase D8 [Source:FlyBase gene name;Acc:FBgn0010044]	181.221	2.0485	5.62042e-09	8.25023	250.608	139.203	109.486	26.3028	32.2292
FBgn0053147	Hs3st-A	protein_coding	Heparan sulfate 3-O sulfotransferase-A [Source:FlyBase gene name;Acc:FBgn0053147]	24.8703	2.04254	3.10101e-06	5.5085	32.9265	46.0811	38.4018	2.1919	8.31722
FBgn0004378	Klp61F	protein_coding	Kinesin-like protein at 61F [Source:FlyBase gene name;Acc:FBgn0004378]	41.8202	2.03992	9.11435e-08	7.04027	79.5725	70.0817	79.2548	12.0555	15.5948
FBgn0001217	Hsc70-2	protein_coding	Heat shock protein cognate 2 [Source:FlyBase gene name;Acc:FBgn0001217]	64.8272	2.03139	5.49865e-11	10.2597	87.8041	97.9223	93.1448	23.015	15.5948
FBgn0035210	msd5	protein_coding	mitotic spindle density 5 [Source:FlyBase gene name;Acc:FBgn0035210]	30.1464	2.02348	9.05684e-07	6.04302	38.4143	47.0411	42.4871	3.28785	10.3965
FBgn0039323	CG10559	protein_coding		189.177	2.01678	1.16267e-09	8.93454	203.962	171.844	172.4	36.1664	33.2689
FBgn0037974	CG12224	protein_coding		220.443	2.01495	1.1484e-07	6.93991	168.291	82.562	77.6207	12.0555	20.7931
FBgn0031381	Npc2a	protein_coding	Niemann-Pick type C-2a [Source:FlyBase gene name;Acc:FBgn0031381]	794.008	2.00704	9.11786e-21	20.0401	686.884	983.064	1184.74	212.614	223.525
FBgn0000140	asp	protein_coding	abnormal spindle [Source:FlyBase gene name;Acc:FBgn0000140]	26.4693	2.00438	7.82441e-05	4.10655	75.914	42.241	36.7677	3.28785	7.27757
FBgn0050090	CG30090	protein_coding		133.592	2.00197	6.86768e-10	9.16319	297.253	189.125	167.497	32.8785	57.1809
FBgn0035948	CG5644	protein_coding		15.8042	2.00161	3.33613e-05	4.47676	20.1218	29.7607	20.4265	2.1919	2.07931
FBgn0261989	CG42807	protein_coding		4284	1.99695	4.3465e-06	5.36186	8866.38	4692.59	4836.18	579.758	1356.75
FBgn0051453	pch2	protein_coding		54.3419	1.99439	8.53154e-09	8.06897	104.267	82.562	110.303	15.3433	24.9517
FBgn0260986	mei-38	protein_coding	meiotic 38 [Source:FlyBase gene name;Acc:FBgn0260986]	8.72576	1.99004	0.00015811	3.80104	19.2071	12.4803	19.6094	0	1.03965
FBgn0001233	Hsp83	protein_coding	Heat shock protein 83 [Source:FlyBase gene name;Acc:FBgn0001233]	10762.5	1.97549	6.14354e-05	4.21158	3259.73	16546	15616.5	1145.27	1267.34
FBgn0013765	cnn	protein_coding	centrosomin [Source:FlyBase gene name;Acc:FBgn0013765]	326.69	1.97107	5.2947e-28	27.2762	553.349	545.293	603.807	144.665	132.036
FBgn0004170	sc	protein_coding	scute [Source:FlyBase gene name;Acc:FBgn0004170]	14.7014	1.97042	7.68992e-05	4.11408	23.7803	27.8407	33.4995	2.1919	4.15861
FBgn0003545	sub	protein_coding	subito [Source:FlyBase gene name;Acc:FBgn0003545]	11.5657	1.9685	0.000142252	3.84694	25.6095	21.1205	19.6094	0	3.11896
FBgn0036767	CG16775	protein_coding		4302.99	1.96054	3.81206e-20	19.4188	6098.73	3626.97	4305.91	1103.62	1125.94
FBgn0051157	CG31157	protein_coding		8.21977	1.9579	0.000238716	3.62212	17.3779	13.4403	11.4388	0	1.03965
FBgn0267167	CR45607	lincRNA		5.06795	1.95568	0.000252343	3.59801	9.14626	17.2804	15.5241	0	1.03965
FBgn0024227	aurB	protein_coding	aurora B [Source:FlyBase gene name;Acc:FBgn0024227]	25.5449	1.95149	3.04315e-05	4.51668	30.1827	45.1211	58.8283	2.1919	10.3965
FBgn0031412	CG16995	protein_coding		155.125	1.9413	1.35832e-09	8.867	347.558	187.204	237.764	54.7975	58.2205
FBgn0035761	RhoGEF4	protein_coding	Rho guanine nucleotide exchange factor 4 [Source:FlyBase gene name;Acc:FBgn0035761]	28.3384	1.9385	1.85096e-06	5.7326	57.6214	48.0012	54.743	9.86355	10.3965
FBgn0031252	CG13690	protein_coding		19.1991	1.9339	9.49693e-05	4.02242	36.585	26.8806	36.7677	5.47975	2.07931
FBgn0010097	gammaTub37C	protein_coding	gamma-Tubulin at 37C [Source:FlyBase gene name;Acc:FBgn0010097]	9.37698	1.93362	0.000348088	3.45831	31.0973	21.1205	25.3289	2.1919	1.03965
FBgn0039768	CG15533	protein_coding		2198.26	1.92667	6.62279e-13	12.179	1692.97	3660.57	1928.26	623.596	531.263
FBgn0046689	Takl1	protein_coding	Tak1-like 1 [Source:FlyBase gene name;Acc:FBgn0046689]	1207.5	1.92318	4.60174e-19	18.3371	2006.69	1718.44	1717.46	415.365	475.121
FBgn0003525	stg	protein_coding	string [Source:FlyBase gene name;Acc:FBgn0003525]	27.1125	1.91924	0.000232815	3.63299	82.3163	39.3609	46.5724	4.3838	8.31722
FBgn0052251	Claspin	protein_coding	Claspin [Source:FlyBase gene name;Acc:FBgn0052251]	63.9708	1.91889	5.57363e-09	8.25386	78.6578	89.2821	95.596	19.7271	17.6741
FBgn0037405	CG1077	protein_coding		11.2333	1.91661	0.000230274	3.63775	16.4633	20.1605	31.8653	1.09595	3.11896
FBgn0041225	Gr94a	protein_coding	Gustatory receptor 94a [Source:FlyBase gene name;Acc:FBgn0041225]	12.4286	1.91432	0.000279584	3.55349	13.7194	19.2005	15.5241	0	0
FBgn0038199	CCHa1	protein_coding	CCHamide-1 [Source:FlyBase gene name;Acc:FBgn0038199]	201.173	1.90805	1.4098e-14	13.8508	361.277	400.33	485.334	93.1558	112.282
FBgn0033192	Corin	protein_coding	Corin [Source:FlyBase gene name;Acc:FBgn0033192]	18.3963	1.89847	1.82882e-05	4.73783	42.9874	42.241	36.7677	7.67165	8.31722
FBgn0261363	PPO3	protein_coding	Prophenoloxidase 3 [Source:FlyBase gene name;Acc:FBgn0261363]	10.893	1.87889	0.000290544	3.53679	18.2925	18.2404	18.7924	1.09595	3.11896
FBgn0030271	CG15202	protein_coding		59.271	1.87161	4.53922e-05	4.34302	206.705	64.3215	53.1089	23.015	16.6344
FBgn0039683	dmrt99B	protein_coding	doublesex-Mab related 99B [Source:FlyBase gene name;Acc:FBgn0039683]	6.88361	1.86919	0.000507103	3.2949	10.9755	17.2804	10.6218	0	1.03965
FBgn0029003	mab-21	protein_coding	mab-21 [Source:FlyBase gene name;Acc:FBgn0029003]	4.37725	1.86724	0.000451505	3.34534	7.31701	12.4803	15.5241	0	0
FBgn0033999	CG8093	protein_coding		1676.46	1.86714	3.98534e-16	15.3995	1668.28	1294.11	886.51	291.523	350.363
FBgn0024332	Mcm3	protein_coding	Minichromosome maintenance 3 [Source:FlyBase gene name;Acc:FBgn0024332]	71.7281	1.86525	4.03385e-09	8.39428	88.7187	91.2022	109.486	24.1109	19.7534
FBgn0039250	Mink	protein_coding	Mitotic spindle and nuclear protein [Source:FlyBase gene name;Acc:FBgn0039250]	26.3969	1.85839	1.81031e-05	4.74225	52.1337	47.0411	50.6577	12.0555	7.27757
FBgn0038020	GstD9	protein_coding	Glutathione S transferase D9 [Source:FlyBase gene name;Acc:FBgn0038020]	809.123	1.85414	3.37827e-26	25.4713	879.87	870.741	876.705	210.422	250.556
FBgn0051955	CG31955	protein_coding		75.6364	1.85347	1.30786e-06	5.88344	36.585	45.1211	71.0842	9.86355	7.27757
FBgn0260000	CG17570	protein_coding		331.739	1.85259	1.44858e-07	6.83906	103.353	291.847	346.433	48.2218	56.1412
FBgn0038440	Gr89a	protein_coding	Gustatory receptor 89a [Source:FlyBase gene name;Acc:FBgn0038440]	26.1145	1.85118	9.6659e-06	5.01476	34.7558	41.281	38.4018	7.67165	6.23792
FBgn0036229	CG7248	protein_coding		9.48687	1.8433	0.000634779	3.19738	6.40238	22.0805	17.1583	0	0
FBgn0023395	Chd3	protein_coding	Chd3 [Source:FlyBase gene name;Acc:FBgn0023395]	20.7724	1.82968	0.000117304	3.93069	51.2191	32.6408	36.7677	5.47975	8.31722
FBgn0015270	Orc2	protein_coding	Origin recognition complex subunit 2 [Source:FlyBase gene name;Acc:FBgn0015270]	20.6915	1.8288	6.71487e-05	4.17296	37.4997	25.9206	23.6947	4.3838	4.15861
FBgn0036993	CG5910	protein_coding		1497.97	1.82586	5.06028e-22	21.2958	2305.77	1757.8	1831.03	504.137	545.818
FBgn0051410	Npc2e	protein_coding	Niemann-Pick type C-2e [Source:FlyBase gene name;Acc:FBgn0051410]	744.671	1.82444	2.79069e-05	4.55429	1032.61	1150.11	1510.74	240.013	240.16
FBgn0033443	CG1698	protein_coding		2240.42	1.81828	8.12621e-23	22.0901	3502.1	4582.19	4316.53	1052.11	1197.68
FBgn0000147	aurA	protein_coding	aurora A [Source:FlyBase gene name;Acc:FBgn0000147]	10.5117	1.81099	0.000761511	3.11832	32.0119	17.2804	13.89	1.09595	2.07931
FBgn0035699	CG13300	protein_coding		30.9161	1.80754	1.2303e-05	4.90999	53.9629	44.1611	34.3165	7.67165	9.35687
FBgn0024288	Sox100B	protein_coding	Sox100B [Source:FlyBase gene name;Acc:FBgn0024288]	203.492	1.80488	9.57298e-13	12.019	329.265	328.328	375.03	89.8679	90.4498
FBgn0035640	mad2	protein_coding	mad2 [Source:FlyBase gene name;Acc:FBgn0035640]	15.8503	1.79647	0.000306839	3.51309	27.4388	19.2005	22.0606	1.09595	4.15861
FBgn0053468	CG33468	protein_coding		39.8761	1.79467	5.7891e-05	4.23739	55.7922	43.201	50.6577	5.47975	11.4362
FBgn0000180	bib	protein_coding	big brain [Source:FlyBase gene name;Acc:FBgn0000180]	31.3479	1.79308	3.02914e-05	4.51868	55.7922	51.8412	40.0359	4.3838	14.5551
FBgn0032929	Mcm10	protein_coding	Minichromosome maintenance 10 [Source:FlyBase gene name;Acc:FBgn0032929]	22.8951	1.78806	0.000484489	3.31472	49.3898	35.5209	35.9506	3.28785	7.27757
FBgn0035727	CG10063	protein_coding		12.494	1.77575	0.000891786	3.04974	15.5486	30.7207	31.0483	2.1919	5.19826
FBgn0037783	Npc2c	protein_coding	Niemann-Pick type C-2c [Source:FlyBase gene name;Acc:FBgn0037783]	71.2442	1.77446	0.000339927	3.46861	111.584	38.4009	26.1459	6.5757	5.19826
FBgn0000395	cv-2	protein_coding	crossveinless 2 [Source:FlyBase gene name;Acc:FBgn0000395]	397.788	1.77208	4.86377e-17	16.313	688.713	634.575	629.136	151.241	207.931
FBgn0030170	CG2990	protein_coding		12.6699	1.76993	0.000952354	3.0212	28.3534	20.1605	12.2559	0	2.07931
FBgn0266916	Cenp-C	protein_coding		49.1696	1.7675	1.96982e-06	5.70557	74.0847	75.8418	71.9013	10.9595	22.8724
FBgn0033659	Damm	protein_coding	Death associated molecule related to Mch2 caspase [Source:FlyBase gene name;Acc:FBgn0033659]	5245.67	1.76698	4.16364e-40	39.3805	8250.84	7300.98	8378.95	2300.4	2276.84
FBgn0051614	His-Psi:CR31614	pseudogene	His-Psi:CR31614 [Source:FlyBase gene name;Acc:FBgn0051614]	6.99447	1.76661	0.00102511	2.98923	16.4633	24.0006	13.89	1.09595	0
FBgn0010314	Cks30A	protein_coding	Cyclin-dependent kinase subunit 30A [Source:FlyBase gene name;Acc:FBgn0010314]	11.796	1.76402	0.00130946	2.88291	43.9021	10.5603	22.8777	0	3.11896
FBgn0262854	CG43218	protein_coding		38.7641	1.75924	7.09508e-06	5.14904	37.4997	47.0411	59.6454	13.1514	7.27757
FBgn0030983	CG15882	protein_coding		8.39656	1.75864	0.00105152	2.97818	14.634	20.1605	21.2436	2.1919	3.11896
FBgn0039596	CG10000	protein_coding		188.705	1.75465	2.81412e-10	9.55066	246.034	328.328	324.373	80.0044	79.0136
FBgn0050414	CG30414	protein_coding		36.5572	1.75329	1.03418e-05	4.9854	44.8167	69.1217	80.8889	15.3433	15.5948
FBgn0026756	Ugt37a1	protein_coding	UDP-glycosyltransferase 37a1 [Source:FlyBase gene name;Acc:FBgn0026756]	282.397	1.74246	1.0718e-08	7.96989	525.91	363.849	331.726	107.403	103.965
FBgn0003401	shu	protein_coding	shutdown [Source:FlyBase gene name;Acc:FBgn0003401]	15.1186	1.73824	0.00077704	3.10956	27.4388	22.0805	27.78	1.09595	5.19826
FBgn0031886	Nuf2	protein_coding	Nuf2 [Source:FlyBase gene name;Acc:FBgn0031886]	15.4561	1.73819	0.000470503	3.32744	32.9265	22.0805	25.3289	5.47975	3.11896
FBgn0035120	wac	protein_coding	wee Augmin [Source:FlyBase gene name;Acc:FBgn0035120]	29.2078	1.73678	4.88803e-05	4.31087	33.8412	56.6414	51.4748	8.7676	11.4362
FBgn0034756	Cyp6d2	protein_coding	Cyp6d2 [Source:FlyBase gene name;Acc:FBgn0034756]	596.51	1.73552	7.33962e-11	10.1343	497.557	297.607	245.118	86.5801	95.648
FBgn0263080	CG43348	protein_coding		617.034	1.73365	6.07588e-12	11.2164	1022.55	707.537	1017.24	255.356	250.556
FBgn0033980	Cyp6a20	protein_coding	Cyp6a20 [Source:FlyBase gene name;Acc:FBgn0033980]	699.498	1.73124	6.5847e-26	25.1815	668.592	636.495	549.064	161.105	194.415
FBgn0265377	CR44318	lincRNA		76.5117	1.72728	1.26969e-08	7.8963	93.2919	115.203	137.266	31.7826	29.1103
FBgn0051704	CG31704	protein_coding		654.055	1.72591	3.18558e-12	11.4968	931.089	555.853	608.71	176.448	210.01
FBgn0015037	Cyp4p1	protein_coding	Cytochrome P450-4p1 [Source:FlyBase gene name;Acc:FBgn0015037]	1465.91	1.72502	3.1983e-57	56.4951	2314.92	2204.21	2206.88	672.913	664.338
FBgn0038450	CG17560	protein_coding		51.7691	1.72315	0.000299985	3.5229	51.2191	45.1211	13.89	1.09595	7.27757
FBgn0027521	CG3679	protein_coding		20.3499	1.71305	0.00057458	3.24065	49.3898	26.8806	33.4995	8.7676	4.15861
FBgn0061476	Zwilch	protein_coding	Zwilch [Source:FlyBase gene name;Acc:FBgn0061476]	32.7595	1.70632	1.06646e-05	4.97205	52.1337	44.1611	49.8407	13.1514	10.3965
FBgn0030824	CG5070	protein_coding		9.61918	1.70606	0.00129867	2.8865	30.1827	29.7607	13.89	0	0
FBgn0005683	pie	protein_coding	pineapple eye [Source:FlyBase gene name;Acc:FBgn0005683]	17.9537	1.70489	0.000466479	3.33117	34.7558	24.9606	29.4142	2.1919	8.31722
FBgn0027527	Osi6	protein_coding	Osiris 6 [Source:FlyBase gene name;Acc:FBgn0027527]	9.01888	1.70243	0.000893943	3.04869	0.914626	26.8806	53.1089	0	0
FBgn0050008	CG30008	protein_coding		89.8981	1.70085	0.000375568	3.42531	238.717	113.283	51.4748	8.7676	41.5861
FBgn0005660	Ets21C	protein_coding	Ets at 21C [Source:FlyBase gene name;Acc:FBgn0005660]	286.701	1.69499	5.21977e-06	5.28235	418.899	386.889	386.469	87.676	109.164
FBgn0261385	scra	protein_coding	scraps [Source:FlyBase gene name;Acc:FBgn0261385]	102.192	1.68398	1.58505e-09	8.79996	196.645	165.124	177.302	61.3732	40.5465
FBgn0022772	Orc1	protein_coding	Origin recognition complex subunit 1 [Source:FlyBase gene name;Acc:FBgn0022772]	39.4253	1.67653	0.000396352	3.40192	86.8895	47.0411	42.4871	8.7676	13.5155
FBgn0266853	CR45314	lincRNA		81.2741	1.67599	7.50147e-07	6.12485	94.2065	99.8424	167.497	30.6866	33.2689
FBgn0030929	CG15043	protein_coding		17007.7	1.6751	3.00308e-24	23.5224	25155.9	25984.9	28988.5	8043.18	8149.84
FBgn0028949	CG15254	protein_coding		732.274	1.67067	3.25873e-12	11.487	955.784	1210.59	1417.6	368.239	337.887
FBgn0063923	Kaz1-ORFB	protein_coding	Kaz1-ORFB [Source:FlyBase gene name;Acc:FBgn0063923]	47.2024	1.67027	1.00998e-05	4.99569	74.9993	60.4815	62.0966	14.2474	17.6741
FBgn0005696	DNApol-alpha73	protein_coding	DNA polymerase alpha 73kD [Source:FlyBase gene name;Acc:FBgn0005696]	27.7184	1.66912	0.000214147	3.66929	58.5361	28.8007	42.4871	9.86355	8.31722
FBgn0002873	mud	protein_coding	mushroom body defect [Source:FlyBase gene name;Acc:FBgn0002873]	34.5032	1.66866	0.000112323	3.94953	76.8286	51.8412	45.7554	10.9595	15.5948
FBgn0030964	Pvf1	protein_coding	PDGF- and VEGF-related factor 1 [Source:FlyBase gene name;Acc:FBgn0030964]	649.056	1.66785	2.6564e-12	11.5757	1378.34	890.901	1004.17	290.427	350.363
FBgn0262619	DNA-ligI	protein_coding	DNA ligase I [Source:FlyBase gene name;Acc:FBgn0262619]	50.5903	1.65984	2.45075e-06	5.6107	65.8531	62.4015	75.9866	9.86355	24.9517
FBgn0015351	CG14906	protein_coding		170.542	1.65835	5.77889e-13	12.2382	192.071	224.645	233.679	48.2218	79.0136
FBgn0050268	CG30268	protein_coding		3.22272	1.65204	0.00085438	3.06835	16.4633	9.60023	6.53648	0	0
FBgn0040850	CG15210	protein_coding		832.268	1.64414	1.55225e-10	9.80904	1760.66	1049.31	1369.39	378.103	443.932
FBgn0004394	pdm2	protein_coding	POU domain protein 2 [Source:FlyBase gene name;Acc:FBgn0004394]	341.217	1.64045	1.30291e-13	12.8851	748.164	517.452	621.783	195.079	187.137
FBgn0038842	hdly	protein_coding	hadley [Source:FlyBase gene name;Acc:FBgn0038842]	839.989	1.63885	1.104e-18	17.957	1305.17	1696.36	1773.02	425.229	560.373
FBgn0031888	Pvf2	protein_coding	PDGF- and VEGF-related factor 2 [Source:FlyBase gene name;Acc:FBgn0031888]	37.0299	1.6343	5.30081e-06	5.27566	62.1946	55.6813	59.6454	14.2474	17.6741
FBgn0036815	HipHop	protein_coding	HP1-HOAP-interacting protein [Source:FlyBase gene name;Acc:FBgn0036815]	33.7328	1.63173	9.32745e-05	4.03024	51.2191	33.6008	48.2065	6.5757	13.5155
FBgn0034569	dgt3	protein_coding	dim gamma-tubulin 3 [Source:FlyBase gene name;Acc:FBgn0034569]	20.3837	1.63156	0.00108782	2.96344	28.3534	26.8806	31.8653	3.28785	6.23792
FBgn0262945	CR43264	lincRNA		17.6901	1.62955	0.000459838	3.3374	32.0119	24.0006	27.78	5.47975	6.23792
FBgn0031317	CG5118	protein_coding		997.504	1.6231	2.25763e-13	12.6463	1574.99	1364.19	1286.05	421.941	436.654
FBgn0002905	mus308	protein_coding	mutagen-sensitive 308 [Source:FlyBase gene name;Acc:FBgn0002905]	80.2807	1.62205	3.90259e-06	5.40865	88.7187	116.163	129.095	18.6312	41.5861
FBgn0003969	vap	protein_coding	vacuolar peduncle [Source:FlyBase gene name;Acc:FBgn0003969]	567.212	1.6177	1.78652e-20	19.748	737.189	840.02	809.706	232.341	266.151
FBgn0027932	Akap200	protein_coding	A kinase anchor protein 200 [Source:FlyBase gene name;Acc:FBgn0027932]	3769.13	1.61522	6.30063e-19	18.2006	5886.53	5783.18	6262.76	1847.77	1904.64
FBgn0085415	CG34386	protein_coding		336.293	1.61316	1.17679e-14	13.9293	525.91	669.136	738.622	200.559	202.732
FBgn0033890	Ctf4	protein_coding		52.0048	1.61287	8.74376e-06	5.0583	45.7313	72.0017	68.633	19.7271	12.4758
FBgn0033354	FANCI	protein_coding	Fanconi anemia complementation group I homologue [Source:FlyBase gene name;Acc:FBgn0033354]	32.4718	1.61283	0.000133667	3.87398	39.3289	48.0012	59.6454	6.5757	16.6344
FBgn0263106	DnaJ-1	protein_coding	DnaJ-like-1 [Source:FlyBase gene name;Acc:FBgn0263106]	1240.41	1.6084	0.0011418	2.94241	350.302	1579.24	1546.69	192.887	195.455
FBgn0035414	CG14965	protein_coding		22.1564	1.59947	0.000669426	3.1743	22.8657	31.6808	33.4995	3.28785	8.31722
FBgn0029856	CG11700	protein_coding		149.975	1.59939	2.51737e-10	9.59905	249.693	258.246	303.129	85.4841	87.3308
FBgn0032249	CG5337	protein_coding		55.6726	1.59299	1.58203e-06	5.80078	92.3772	106.563	113.571	24.1109	37.4275
FBgn0085486	CG34457	protein_coding		31.9769	1.59074	0.000798373	3.09779	28.3534	47.0411	36.7677	7.67165	7.27757
FBgn0037028	CG3618	protein_coding		88.4036	1.58923	7.06948e-08	7.15061	132.621	148.804	144.62	35.0704	49.9033
FBgn0040348	CG3703	protein_coding		66.6813	1.5849	1.88869e-06	5.72384	79.5725	108.483	123.376	29.5907	30.1499
FBgn0030048	CG12112	protein_coding		333.43	1.58484	4.32583e-10	9.36393	352.131	401.29	550.698	140.282	125.798
FBgn0034294	Muc55B	protein_coding	Mucin 55B [Source:FlyBase gene name;Acc:FBgn0034294]	279.904	1.58475	1.2765e-11	10.894	356.704	384.969	437.127	104.115	140.353
FBgn0032401	Plzf	protein_coding	Promyelocytic leukemia zinc finger ortholog [Source:FlyBase gene name;Acc:FBgn0032401]	100.238	1.58297	2.14827e-08	7.66791	130.792	145.923	173.217	49.3178	41.5861
FBgn0262524	ver	protein_coding	verrocchio [Source:FlyBase gene name;Acc:FBgn0262524]	73.2346	1.56078	3.6581e-07	6.43674	83.231	72.0017	69.4501	16.4393	27.031
FBgn0032848	nesd	protein_coding	nessun dorma [Source:FlyBase gene name;Acc:FBgn0032848]	34.6576	1.56017	2.92602e-05	4.53372	56.7068	62.4015	54.743	18.6312	14.5551
FBgn0023513	CG14803	protein_coding		118.308	1.55518	1.33363e-07	6.87496	125.304	170.884	138.083	37.2623	50.943
FBgn0040290	RecQ4	protein_coding	RecQ4 [Source:FlyBase gene name;Acc:FBgn0040290]	36.3637	1.5524	0.000460941	3.33635	52.1337	56.6414	53.926	6.5757	19.7534
FBgn0014861	Mcm2	protein_coding	Minichromosome maintenance 2 [Source:FlyBase gene name;Acc:FBgn0014861]	74.4284	1.5466	1.05117e-07	6.97833	116.158	114.243	102.132	28.4947	39.5068
FBgn0030500	Ndc80	protein_coding	Ndc80 [Source:FlyBase gene name;Acc:FBgn0030500]	25.6024	1.54282	0.000358917	3.44501	34.7558	45.1211	52.2918	7.67165	15.5948
FBgn0022700	Cht4	protein_coding	Chitinase 4 [Source:FlyBase gene name;Acc:FBgn0022700]	790.662	1.5388	4.61848e-13	12.3355	1553.95	1366.11	1324.45	404.406	525.025
FBgn0030628	CG9114	protein_coding		122.397	1.5354	1.30691e-07	6.88375	139.938	158.404	188.741	42.7421	59.2602
FBgn0053533	lectin-37Db	protein_coding	lectin-37Db [Source:FlyBase gene name;Acc:FBgn0053533]	3162.54	1.53033	3.56146e-27	26.4484	3792.04	3721.05	3951.3	1170.47	1409.77
FBgn0035806	PGRP-SD	protein_coding	PGRP-SD [Source:FlyBase gene name;Acc:FBgn0035806]	31.1643	1.52952	0.00145554	2.83698	44.8167	27.8407	40.0359	7.67165	7.27757
FBgn0034761	CG4250	protein_coding		139.59	1.51853	9.46298e-06	5.02397	224.998	209.285	332.543	54.7975	101.886
FBgn0261801	CG42747	protein_coding		30.4634	1.51791	0.000286179	3.54336	46.6459	58.5614	33.4995	10.9595	13.5155
FBgn0036287	CG10663	protein_coding		23.1185	1.51629	0.0011768	2.9293	32.9265	34.5608	35.9506	3.28785	12.4758
FBgn0050085	Rif1	protein_coding	Rap1 interacting factor 1 homolog [Source:FlyBase gene name;Acc:FBgn0050085]	76.8879	1.50974	1.45189e-06	5.83807	115.243	96.0023	87.4254	28.4947	32.2292
FBgn0000008	a	protein_coding	arc [Source:FlyBase gene name;Acc:FBgn0000008]	67.5681	1.50549	6.06368e-07	6.21726	137.194	93.1222	101.315	37.2623	33.2689
FBgn0033778	CG3790	protein_coding		27.1754	1.49838	0.000652745	3.18526	53.0483	32.6408	45.7554	14.2474	9.35687
FBgn0029766	CG15784	protein_coding		19480.2	1.4981	4.33653e-05	4.36286	29814.1	16304.1	16804.5	5940.05	6329.41
FBgn0026598	Apc2	protein_coding	Adenomatous polyposis coli tumor suppressor homolog 2 [Source:FlyBase gene name;Acc:FBgn0026598]	34.5856	1.49728	0.000701243	3.15413	71.3408	49.9212	41.6701	16.4393	12.4758
FBgn0033926	Arc1	protein_coding	Activity-regulated cytoskeleton associated protein 1 [Source:FlyBase gene name;Acc:FBgn0033926]	8266.12	1.49564	2.19817e-38	37.6579	7756.03	7338.42	6717.05	2503.15	2564.82
FBgn0041184	Socs36E	protein_coding	Suppressor of cytokine signaling at 36E [Source:FlyBase gene name;Acc:FBgn0041184]	1481.55	1.49407	0.00109739	2.95964	1929.86	2099.57	2166.84	438.38	611.316
FBgn0002609	E(spl)m3-HLH	protein_coding	Enhancer of split m3, helix-loop-helix [Source:FlyBase gene name;Acc:FBgn0002609]	128.723	1.49218	3.21002e-08	7.49349	198.474	195.845	260.642	64.6611	79.0136
FBgn0029821	CG4020	protein_coding		45.6846	1.49161	0.000441113	3.35545	89.6334	57.6014	38.4018	13.1514	20.7931
FBgn0035918	Cdc6	protein_coding	Cdc6 [Source:FlyBase gene name;Acc:FBgn0035918]	26.7513	1.4904	0.000508332	3.29385	38.4143	35.5209	26.963	6.5757	10.3965
FBgn0038071	Dtg	protein_coding	Dpp target gene [Source:FlyBase gene name;Acc:FBgn0038071]	293.747	1.48608	2.01537e-15	14.6956	459.142	460.811	464.907	142.474	174.662
FBgn0264326	DNApol-epsilon255	protein_coding	DNA polymerase epsilon 255kD subunit [Source:FlyBase gene name;Acc:FBgn0264326]	69.68	1.46629	8.13131e-05	4.08984	108.84	115.203	74.3525	27.3988	32.2292
FBgn0015929	dpa	protein_coding	disc proliferation abnormal [Source:FlyBase gene name;Acc:FBgn0015929]	121.417	1.46558	7.89256e-08	7.10278	220.425	171.844	163.412	48.2218	74.855
FBgn0035355	CG16985	protein_coding		1196.38	1.4655	2.62663e-19	18.5806	1642.67	1472.68	1372.66	522.768	527.104
FBgn0004584	Rrp1	protein_coding	Recombination repair protein 1 [Source:FlyBase gene name;Acc:FBgn0004584]	115.572	1.44492	1.56158e-08	7.80644	169.206	159.364	198.546	55.8935	64.4585
FBgn0052579	CG32579	protein_coding		153.186	1.44382	5.85065e-08	7.2328	225.913	182.404	178.936	60.2773	71.736
FBgn0250836	CG8628	protein_coding		6758.32	1.44127	1.07833e-14	13.9672	5645.07	8517.32	8853.66	2712.48	2710.37
FBgn0039273	CG9996	protein_coding		61.5397	1.43798	2.9448e-06	5.53094	72.2555	94.0823	87.4254	27.3988	28.0706
FBgn0261004	asl	protein_coding	asterless [Source:FlyBase gene name;Acc:FBgn0261004]	48.5054	1.43753	1.39845e-05	4.85435	64.0238	69.1217	78.4378	20.8231	24.9517
FBgn0020880	CG7179	protein_coding		37.2633	1.43126	0.000222179	3.6533	63.1092	41.281	49.0236	15.3433	15.5948
FBgn0010194	Wnt5	protein_coding	Wnt oncogene analog 5 [Source:FlyBase gene name;Acc:FBgn0010194]	40.5334	1.42533	0.000329895	3.48162	46.6459	72.9617	98.8642	26.3028	20.7931
FBgn0031695	Cyp4ac3	protein_coding	Cyp4ac3 [Source:FlyBase gene name;Acc:FBgn0031695]	260.232	1.40927	2.73763e-14	13.5626	582.617	507.852	538.442	196.175	203.772
FBgn0250837	dUTPase	protein_coding	Deoxyuridine triphosphatase [Source:FlyBase gene name;Acc:FBgn0250837]	128.674	1.40701	1.18384e-07	6.92671	179.267	176.644	168.314	56.9894	64.4585
FBgn0037025	Spc105R	protein_coding	Spc105-related [Source:FlyBase gene name;Acc:FBgn0037025]	31.2503	1.40333	0.000888209	3.05148	42.0728	51.8412	62.9136	15.3433	16.6344
FBgn0250869	CG42240	protein_coding		995.88	1.39495	2.55298e-09	8.59295	1402.12	1251.87	1290.95	447.148	495.914
FBgn0038082	CG5724	protein_coding		2369.18	1.3947	9.59369e-17	16.018	3254.24	2357.82	2360.49	966.628	993.908
FBgn0038118	timeout	protein_coding	timeout [Source:FlyBase gene name;Acc:FBgn0038118]	50.9049	1.39319	0.000191467	3.71791	90.548	68.1616	78.4378	28.4947	22.8724
FBgn0035708	CG8398	protein_coding		370.008	1.39038	2.09449e-11	10.6789	537.8	578.894	540.077	198.367	204.812
FBgn0034724	babos	protein_coding	babos [Source:FlyBase gene name;Acc:FBgn0034724]	146.186	1.38814	2.75211e-08	7.56033	177.437	224.645	253.289	71.2368	85.2515
FBgn0086350	tef	protein_coding	teflon [Source:FlyBase gene name;Acc:FBgn0086350]	52.9125	1.38428	1.7795e-05	4.7497	86.8895	83.522	87.4254	26.3028	33.2689
FBgn0027795	CG14785	protein_coding		49.9	1.38327	0.000221661	3.65431	50.3044	57.6014	41.6701	17.5352	14.5551
FBgn0036485	FucTA	protein_coding	FucTA [Source:FlyBase gene name;Acc:FBgn0036485]	66.8193	1.3805	1.28169e-06	5.89222	123.475	105.603	107.852	36.1664	43.6654
FBgn0042175	CG18858	protein_coding		76.2947	1.37912	1.15499e-05	4.93742	112.499	101.762	112.754	33.9745	41.5861
FBgn0036240	CG6928	protein_coding		159.09	1.37722	7.04296e-08	7.15224	159.145	245.766	223.874	77.8125	72.7757
FBgn0051216	Naam	protein_coding	Nicotinamide amidase [Source:FlyBase gene name;Acc:FBgn0051216]	93.5009	1.37457	2.28969e-06	5.64022	99.6942	152.644	165.046	52.6056	45.7447
FBgn0010358	deltaTry	protein_coding	deltaTrypsin [Source:FlyBase gene name;Acc:FBgn0010358]	430.595	1.37104	1.00733e-05	4.99683	378.655	854.42	870.986	269.604	227.684
FBgn0035886	Jon66Ci	protein_coding	Jonah 66Ci [Source:FlyBase gene name;Acc:FBgn0035886]	1718.48	1.36573	1.7636e-08	7.7536	2686.26	2845.51	3456.16	1046.63	1184.16
FBgn0037531	CG10445	protein_coding		46.7828	1.3652	0.000209833	3.67813	59.4507	56.6414	65.3648	12.0555	27.031
FBgn0010041	GstD5	protein_coding	Glutathione S transferase D5 [Source:FlyBase gene name;Acc:FBgn0010041]	219.485	1.36502	1.26174e-05	4.89903	182.011	214.085	200.997	69.0449	66.5378
FBgn0000246	c(3)G	protein_coding	crossover suppressor on 3 of Gowen [Source:FlyBase gene name;Acc:FBgn0000246]	69.7291	1.35913	6.29965e-06	5.20068	74.0847	100.802	102.132	31.7826	33.2689
FBgn0041205	key	protein_coding	kenny [Source:FlyBase gene name;Acc:FBgn0041205]	1502.34	1.354	4.93671e-12	11.3066	2088.09	1859.56	1832.67	722.231	725.678
FBgn0015376	cutlet	protein_coding	cutlet [Source:FlyBase gene name;Acc:FBgn0015376]	47.0363	1.35024	7.73072e-05	4.11178	64.0238	53.7613	53.926	20.8231	17.6741
FBgn0028997	nmdyn-D7	protein_coding	nmdyn-D7 [Source:FlyBase gene name;Acc:FBgn0028997]	54.8569	1.34725	4.92001e-05	4.30803	65.8531	82.562	75.1695	23.015	29.1103
FBgn0027558	pgant3	protein_coding	polypeptide GalNAc transferase 3 [Source:FlyBase gene name;Acc:FBgn0027558]	569.793	1.34525	3.78701e-23	22.4217	938.406	868.821	985.374	332.073	388.83
FBgn0032906	RPA2	protein_coding	Replication protein A2 [Source:FlyBase gene name;Acc:FBgn0032906]	129.305	1.34073	1.05117e-07	6.97833	192.071	168.964	176.485	48.2218	84.2119
FBgn0026084	cib	protein_coding	ciboulot [Source:FlyBase gene name;Acc:FBgn0026084]	3451.5	1.33995	1.207e-16	15.9183	4650.87	5700.62	6035.62	2032.99	2181.19
FBgn0041607	asparagine-synthetase	protein_coding	asparagine synthetase [Source:FlyBase gene name;Acc:FBgn0041607]	257.318	1.33957	1.15363e-10	9.93793	241.461	278.407	264.727	87.676	108.124
FBgn0051041	CG31041	protein_coding		1967.25	1.33919	0.000727587	3.13812	2163.09	1802.92	2109.65	590.717	704.884
FBgn0085452	CG34423	protein_coding		183.292	1.33826	2.23647e-10	9.65044	180.181	182.404	200.18	65.757	74.855
FBgn0003268	rod	protein_coding	rough deal [Source:FlyBase gene name;Acc:FBgn0003268]	64.923	1.33264	1.08691e-05	4.96381	89.6334	100.802	105.401	38.3583	33.2689
FBgn0034614	CG9752	protein_coding		27.9172	1.32741	0.00128077	2.89253	43.9021	40.321	39.2189	9.86355	16.6344
FBgn0046685	Wsck	protein_coding	Wsck [Source:FlyBase gene name;Acc:FBgn0046685]	127.75	1.32565	3.0158e-08	7.5206	162.803	218.885	200.997	63.5651	83.1722
FBgn0036648	CG4098	protein_coding		43.3625	1.3247	0.000258051	3.58829	48.4752	69.1217	66.1819	25.2069	17.6741
FBgn0030189	CG2909	protein_coding		176.467	1.31989	7.46499e-07	6.12697	279.876	186.244	158.51	75.6206	77.9739
FBgn0025807	Rad9	protein_coding	Rad9 [Source:FlyBase gene name;Acc:FBgn0025807]	39.9621	1.31635	0.00130946	2.88291	34.7558	42.241	58.8283	8.7676	19.7534
FBgn0031726	Cyp6a16	protein_coding	Cyp6a16 [Source:FlyBase gene name;Acc:FBgn0031726]	193.743	1.30861	1.04362e-05	4.98146	187.498	347.528	346.433	135.898	83.1722
FBgn0267002	unc-104	protein_coding	unc-104 ortholog (C. elegans) [Source:FlyBase gene name;Acc:FBgn0267002]	851.218	1.30795	8.78577e-15	14.0562	1678.34	1390.11	1194.54	568.798	552.056
FBgn0034403	CG18190	protein_coding		61.7071	1.30613	0.000195565	3.70871	121.645	96.0023	74.3525	41.6461	32.2292
FBgn0266431	CG45061	protein_coding		127.975	1.30578	6.74781e-05	4.17084	86.8895	118.083	94.7789	32.8785	36.3878
FBgn0037885	CG17721	protein_coding		70.4133	1.30472	6.21002e-05	4.20691	82.3163	88.3221	84.9742	26.3028	34.3085
FBgn0000084	AnxB10	protein_coding	Annexin B10 [Source:FlyBase gene name;Acc:FBgn0000084]	331.128	1.29958	1.47015e-10	9.83264	332.009	357.129	403.628	133.706	148.67
FBgn0022338	dnk	protein_coding	deoxyribonucleoside kinase [Source:FlyBase gene name;Acc:FBgn0022338]	143.708	1.299	5.47354e-06	5.26173	206.705	128.643	168.314	49.3178	74.855
FBgn0037151	CG7130	protein_coding		86.9347	1.29777	0.000805517	3.09393	47.5606	129.603	116.84	28.4947	37.4275
FBgn0033526	Caf1-105	protein_coding	Caf1-105 [Source:FlyBase gene name;Acc:FBgn0033526]	50.2607	1.28815	0.000903295	3.04417	100.609	58.5614	61.2795	27.3988	23.912
FBgn0036220	CG5897	protein_coding		64.4014	1.28773	3.59046e-05	4.44485	112.499	76.8018	89.0595	38.3583	31.1896
FBgn0263855	BubR1	protein_coding	Bub1-related kinase [Source:FlyBase gene name;Acc:FBgn0263855]	40.9005	1.28389	0.00133648	2.87404	72.2555	51.8412	61.2795	24.1109	18.7137
FBgn0033928	Arc2	protein_coding	Arc2 [Source:FlyBase gene name;Acc:FBgn0033928]	319.921	1.28294	9.7178e-12	11.0124	326.521	300.487	334.995	132.61	120.6
FBgn0000463	Dl	protein_coding	Delta [Source:FlyBase gene name;Acc:FBgn0000463]	105.355	1.28103	8.2707e-07	6.08246	139.023	145.923	140.534	56.9894	51.9826
FBgn0033826	CG4734	protein_coding		2843.18	1.273	1.1975e-06	5.92172	3723.44	5795.66	3914.53	1560.63	1927.52
FBgn0033177	CG11141	protein_coding		464.51	1.26711	3.18043e-07	6.49751	780.176	569.294	538.442	249.877	243.279
FBgn0032087	CG9568	protein_coding		11912.1	1.26344	5.323e-12	11.2738	20385.2	17109.5	20397.1	7279.3	8356.73
FBgn0038470	CG18213	protein_coding		50.7941	1.26172	0.000152812	3.81584	64.0238	79.6819	70.2672	30.6866	22.8724
FBgn0263241	Mocs1	protein_coding	Molybdenum cofactor synthesis 1 ortholog [Source:FlyBase gene name;Acc:FBgn0263241]	969.957	1.25163	5.08851e-15	14.2934	1132.31	972.503	893.046	419.749	397.147
FBgn0027783	SMC2	protein_coding	Structural maintenance of chromosomes 2 [Source:FlyBase gene name;Acc:FBgn0027783]	67.8689	1.25133	1.26174e-05	4.89903	89.6334	100.802	101.315	37.2623	38.4671
FBgn0011660	Pms2	protein_coding	Pms2 [Source:FlyBase gene name;Acc:FBgn0011660]	40.8884	1.24302	0.00032954	3.48209	68.597	68.1616	55.5601	25.2069	23.912
FBgn0039714	Zip99C	protein_coding	Zinc/iron regulated transporter-related protein 99C [Source:FlyBase gene name;Acc:FBgn0039714]	3121.74	1.23739	2.57872e-08	7.5886	3578.02	3655.77	3828.74	1506.93	1473.19
FBgn0051087	CG31087	protein_coding		2173.79	1.23709	1.47513e-09	8.83117	2818.88	2194.61	2255.9	951.285	1019.9
FBgn0033437	CG12926	protein_coding		770.083	1.23391	7.61793e-15	14.1182	913.711	970.583	940.436	378.103	403.385
FBgn0261393	alpha-Est5	protein_coding	alpha-Esterase-5 [Source:FlyBase gene name;Acc:FBgn0261393]	1230.17	1.2329	4.63066e-15	14.3344	733.53	872.661	817.877	313.442	352.442
FBgn0039687	CG7593	protein_coding		40.3914	1.2286	0.000646912	3.18916	50.3044	62.4015	64.5477	21.919	22.8724
FBgn0035356	CG16986	protein_coding		2323.82	1.22089	2.36806e-09	8.62561	2974.36	2678.46	2822.94	1171.57	1158.17
FBgn0039464	CG6330	protein_coding		152.051	1.21644	0.000338316	3.47068	235.974	192.005	160.144	74.5246	75.8946
FBgn0034289	CG10910	protein_coding		6936.55	1.21441	5.87592e-16	15.2309	9133.46	11171.8	10577.7	4439.69	4271.93
FBgn0085227	CG34198	protein_coding		718.047	1.21428	1.24854e-08	7.9036	769.201	543.373	616.063	241.109	286.944
FBgn0033921	tej	protein_coding	tejas [Source:FlyBase gene name;Acc:FBgn0033921]	70.9105	1.21145	0.000205154	3.68792	97.865	137.283	132.364	46.0299	54.0619
FBgn0036742	CG7497	protein_coding		294.414	1.21002	4.06943e-07	6.39047	597.251	347.528	489.419	183.024	212.089
FBgn0031782	WDR79	protein_coding	WD repeat domain 79 homolog [Source:FlyBase gene name;Acc:FBgn0031782]	130.773	1.2062	8.20978e-08	7.08567	169.206	170.884	174.851	62.4692	80.0533
FBgn0051469	CG31469	protein_coding		217.856	1.20471	4.70533e-05	4.32741	312.802	290.887	327.641	129.322	121.639
FBgn0261089	Sytalpha	protein_coding	Synaptotagmin alpha [Source:FlyBase gene name;Acc:FBgn0261089]	161.149	1.20418	1.25997e-06	5.89964	252.437	288.967	385.652	112.883	146.591
FBgn0032683	kon	protein_coding	kon-tiki [Source:FlyBase gene name;Acc:FBgn0032683]	115.554	1.19624	2.72561e-06	5.56454	188.413	221.765	223.057	72.3327	103.965
FBgn0036910	Cyp305a1	protein_coding	Cyp305a1 [Source:FlyBase gene name;Acc:FBgn0036910]	116.315	1.19381	3.4568e-05	4.46133	184.754	184.324	181.387	65.757	84.2119
FBgn0037999	CG4860	protein_coding		116.749	1.19212	3.75073e-05	4.42588	169.206	142.083	160.961	77.8125	49.9033
FBgn0042110	CG18765	protein_coding		93.4417	1.19159	0.00084652	3.07236	118.901	117.123	120.108	33.9745	57.1809
FBgn0260450	CalpC	protein_coding	Calpain C [Source:FlyBase gene name;Acc:FBgn0260450]	242.863	1.19021	1.06139e-05	4.97412	411.582	284.167	253.289	142.474	117.481
FBgn0034312	CG10916	protein_coding		264.697	1.18383	4.50033e-10	9.34676	219.51	259.206	234.496	94.2517	106.045
FBgn0030769	CG13012	protein_coding		103.079	1.18007	8.82404e-06	5.05433	146.34	125.763	114.388	58.0854	48.8637
FBgn0003748	Treh	protein_coding	Trehalase [Source:FlyBase gene name;Acc:FBgn0003748]	8172.66	1.17865	7.62243e-14	13.1179	14903.8	11922.5	10887.3	5317.55	5588.13
FBgn0263456	nwk	protein_coding	nervous wreck [Source:FlyBase gene name;Acc:FBgn0263456]	369.475	1.17853	5.16009e-06	5.28734	281.705	496.332	491.053	173.16	178.82
FBgn0033222	CG12824	protein_coding		762.743	1.17691	1.21929e-14	13.9139	879.87	1014.74	1090.77	413.173	450.17
FBgn0029002	miple2	protein_coding	miple2 [Source:FlyBase gene name;Acc:FBgn0029002]	957.832	1.1753	1.39079e-18	17.8567	1285.96	1255.71	1277.88	529.344	581.166
FBgn0039748	CG15529	protein_coding		61.4244	1.175	0.000404722	3.39284	73.1701	67.2016	67.816	21.919	32.2292
FBgn0038221	CG3259	protein_coding		91.538	1.17386	0.000271346	3.56648	130.792	103.682	71.9013	41.6461	40.5465
FBgn0087035	AGO2	protein_coding	Argonaute 2 [Source:FlyBase gene name;Acc:FBgn0087035]	4097.15	1.1603	1.8972e-11	10.7219	5564.58	4350.82	4364.73	2137.1	2008.61
FBgn0001257	ImpL2	protein_coding	Ecdysone-inducible gene L2 [Source:FlyBase gene name;Acc:FBgn0001257]	820.463	1.15786	6.20769e-07	6.20707	720.725	1038.74	1214.15	364.951	482.399
FBgn0053469	CG33469	protein_coding		40.1531	1.15588	0.0014589	2.83598	56.7068	51.8412	57.1942	25.2069	18.7137
FBgn0038243	CG8066	protein_coding		591.52	1.15132	9.74859e-11	10.0111	759.14	584.654	665.904	267.412	318.134
FBgn0002542	lds	protein_coding	lodestar [Source:FlyBase gene name;Acc:FBgn0002542]	118.961	1.15125	1.39066e-06	5.85678	176.523	149.764	151.973	72.3327	64.4585
FBgn0036290	CG10638	protein_coding		535.77	1.14971	5.00546e-15	14.3006	565.239	504.012	528.638	247.685	222.486
FBgn0031248	CG11912	protein_coding		4193.16	1.14923	1.64046e-06	5.78503	4287.77	7605.3	7520.22	2632.47	2986.92
FBgn0052054	CG32054	protein_coding		1803.74	1.14806	1.37079e-16	15.863	2103.64	2126.45	2110.47	932.654	942.965
FBgn0035476	CG12766	protein_coding		538.396	1.14261	5.27242e-05	4.27799	599.995	312.007	321.922	165.488	174.662
FBgn0261243	Psa	protein_coding	Puromycin sensitive aminopeptidase [Source:FlyBase gene name;Acc:FBgn0261243]	3515.05	1.14084	1.89046e-15	14.7234	4615.2	4184.74	4098.37	1972.71	1857.86
FBgn0011606	Klp3A	protein_coding	Kinesin-like protein at 3A [Source:FlyBase gene name;Acc:FBgn0011606]	66.9831	1.13216	0.000204615	3.68906	69.5116	95.0423	97.2301	36.1664	37.4275
FBgn0034160	CG5550	protein_coding		2581.03	1.12666	4.36033e-05	4.36048	1804.56	2055.41	2181.55	725.519	979.353
FBgn0015591	AstA	protein_coding	Allatostatin A [Source:FlyBase gene name;Acc:FBgn0015591]	515.608	1.12371	4.73219e-08	7.32494	836.883	978.263	1158.59	433.996	456.408
FBgn0038455	CG14907	protein_coding		530.948	1.12308	5.76181e-10	9.23944	607.312	693.137	760.683	303.578	310.856
FBgn0011659	Mlh1	protein_coding	Mlh1 [Source:FlyBase gene name;Acc:FBgn0011659]	55.6912	1.12294	0.000527162	3.27806	74.9993	75.8418	79.2548	31.7826	33.2689
FBgn0036929	CG7668	protein_coding		1113.23	1.12063	4.27997e-07	6.36856	1546.63	1356.51	1378.38	646.611	613.395
FBgn0036486	Msh6	protein_coding	Msh6 [Source:FlyBase gene name;Acc:FBgn0036486]	62.8631	1.11915	0.000561106	3.25095	103.353	87.3621	101.315	44.934	38.4671
FBgn0040837	CG8620	protein_coding		464.995	1.11579	1.13696e-07	6.94425	385.972	497.292	524.552	220.286	196.494
FBgn0035868	CG7194	protein_coding		716.008	1.10538	0.000125773	3.90041	587.19	1249.95	1292.59	450.435	460.566
FBgn0004406	tam	protein_coding	tamas [Source:FlyBase gene name;Acc:FBgn0004406]	272.645	1.10524	2.52347e-08	7.598	277.132	305.287	285.971	123.842	137.234
FBgn0051363	Jupiter	protein_coding	Jupiter [Source:FlyBase gene name;Acc:FBgn0051363]	464.918	1.09621	1.9308e-13	12.7143	717.981	653.776	717.379	302.482	338.927
FBgn0028380	fal	protein_coding	falten [Source:FlyBase gene name;Acc:FBgn0028380]	417.96	1.09375	7.94576e-06	5.09986	522.251	474.251	551.515	232.341	227.684
FBgn0011822	pcl	protein_coding	pepsinogen-like [Source:FlyBase gene name;Acc:FBgn0011822]	2253.21	1.09278	2.19984e-11	10.6576	2968.88	2507.58	2667.7	1197.87	1293.33
FBgn0022893	Df31	protein_coding	Decondensation factor 31 [Source:FlyBase gene name;Acc:FBgn0022893]	675.136	1.08629	3.72477e-07	6.4289	1116.76	944.663	927.363	404.406	503.192
FBgn0263507	CR43496	lincRNA		76.2217	1.07721	0.00131293	2.88176	73.1701	69.1217	57.1942	21.919	33.2689
FBgn0005664	Cry	protein_coding	Crystallin [Source:FlyBase gene name;Acc:FBgn0005664]	630.105	1.07695	0.000172033	3.76439	1241.15	799.699	876.705	383.583	487.597
FBgn0038476	kuk	protein_coding	kugelkern [Source:FlyBase gene name;Acc:FBgn0038476]	83.9804	1.07257	0.000752876	3.12328	128.048	108.483	116.023	49.3178	54.0619
FBgn0265979	CR44758	lincRNA		87.1922	1.06659	0.000509146	3.29316	87.8041	138.243	134.815	60.2773	46.7844
FBgn0046687	Tre1	protein_coding	Trapped in endoderm 1 [Source:FlyBase gene name;Acc:FBgn0046687]	91.1063	1.06196	0.000108302	3.96537	132.621	132.483	138.9	49.3178	72.7757
FBgn0032514	CG9302	protein_coding		111.254	1.04465	1.12395e-05	4.94925	133.535	129.603	138.083	61.3732	62.3792
FBgn0031315	CG14341	protein_coding		123.661	1.04179	7.65709e-05	4.11594	162.803	149.764	156.876	71.2368	72.7757
FBgn0031263	CG2789	protein_coding		4320.3	1.0388	6.07588e-12	11.2164	5260.01	4657.07	5707.16	2509.73	2472.29
FBgn0011260	Sema-2a	protein_coding	Sema-2a [Source:FlyBase gene name;Acc:FBgn0011260]	277.953	1.03269	6.53812e-06	5.18455	411.582	406.09	382.384	170.968	205.851
FBgn0032884	Pomp	protein_coding	Pomp [Source:FlyBase gene name;Acc:FBgn0032884]	968.435	1.03193	2.72595e-18	17.5645	1235.66	1204.83	1240.3	613.732	574.928
FBgn0038702	CG3739	protein_coding		2231.82	1.02969	2.62575e-05	4.58075	4211.85	3257.36	2412.78	1547.48	1565.72
FBgn0033309	CG8735	protein_coding		244.539	1.02399	7.07984e-07	6.14998	282.619	325.448	366.043	146.857	163.225
FBgn0267408	AOX1	protein_coding	Aldehyde oxidase 1 [Source:FlyBase gene name;Acc:FBgn0267408]	29370.1	1.02022	3.31214e-08	7.47989	37333.2	28883.3	24797.8	14828.2	14347.2
FBgn0030928	CG15044	protein_coding		1316.04	1.01965	7.44752e-05	4.12799	1392.98	2102.45	2383.36	1024.71	834.841
FBgn0036291	CG10681	protein_coding		64.6638	1.01781	0.000782861	3.10632	80.4871	78.7219	89.8766	36.1664	40.5465
FBgn0020622	Pi3K21B	protein_coding	Pi3K21B [Source:FlyBase gene name;Acc:FBgn0020622]	808.487	1.01727	1.53067e-06	5.81512	1285.05	959.063	882.425	473.45	522.945
FBgn0033788	CG13323	protein_coding		16454.6	1.01322	1.56607e-20	19.8052	22468.7	21204	23949.7	10874	11285.4
FBgn0028552	gammaSnap1	protein_coding	gamma Soluble NSF attachment protein 1 [Source:FlyBase gene name;Acc:FBgn0028552]	483.332	1.00803	1.79376e-12	11.7462	578.958	563.534	607.076	263.028	307.737
FBgn0038034	Cyp9f3Psi	pseudogene	Cyp9f3Psi [Source:FlyBase gene name;Acc:FBgn0038034]	222.83	1.00745	2.94183e-06	5.53138	165.547	166.084	182.204	89.8679	72.7757
FBgn0038901	Burs	protein_coding	Bursicon [Source:FlyBase gene name;Acc:FBgn0038901]	87.7066	1.00628	0.000766513	3.11548	114.328	80.6419	98.8642	50.4137	40.5465
FBgn0034480	CG16898	protein_coding		1594.02	1.0033	1.27623e-10	9.89407	1332.61	1460.2	1416.78	665.242	705.924
FBgn0030858	IntS2	protein_coding	Integrator 2 [Source:FlyBase gene name;Acc:FBgn0030858]	582.571	1.00188	9.86686e-10	9.00582	629.263	687.376	666.721	313.442	334.768
FBgn0037739	CG12948	protein_coding		66.6024	0.992368	0.000762762	3.11761	89.6334	72.9617	84.9742	41.6461	36.3878
FBgn0035829	HP4	protein_coding	Heterochromatin protein 4 [Source:FlyBase gene name;Acc:FBgn0035829]	105.8	0.990169	0.000395041	3.40336	128.048	157.444	180.57	72.3327	76.9343
FBgn0037391	CG2017	protein_coding		785.575	0.989	6.95606e-11	10.1576	1090.23	885.141	927.363	505.233	454.328
FBgn0027280	l(1)G0193	protein_coding	lethal (1) G0193 [Source:FlyBase gene name;Acc:FBgn0027280]	1257.72	0.985895	6.30421e-07	6.20037	1580.47	1510.12	1578.56	763.877	764.145
FBgn0035661	CG10477	protein_coding		7514.92	0.985412	2.7235e-18	17.5649	8720.96	8357.96	9081.62	4041.86	4687.79
FBgn0039525	CG5646	protein_coding		430.561	0.985379	7.53507e-06	5.12291	385.972	513.612	560.503	227.958	249.517
FBgn0031483	CG9641	protein_coding		135.688	0.9835	0.000107794	3.96741	142.682	153.604	145.437	58.0854	83.1722
FBgn0025726	unc-13	protein_coding	unc-13 [Source:FlyBase gene name;Acc:FBgn0025726]	449.169	0.982554	2.72204e-07	6.56511	483.837	643.215	681.428	299.194	296.301
FBgn0031403	CG15387	protein_coding		67.229	0.978551	0.00143839	2.84212	67.6823	88.3221	89.8766	33.9745	43.6654
FBgn0086251	del	protein_coding	deadlock [Source:FlyBase gene name;Acc:FBgn0086251]	104.445	0.978432	9.54063e-05	4.02042	169.206	168.004	190.375	84.3882	89.4101
FBgn0053301	CG33301	protein_coding		3027.11	0.969659	4.33642e-06	5.36287	1521.94	1511.08	1214.97	740.862	638.347
FBgn0005631	robo	protein_coding	roundabout [Source:FlyBase gene name;Acc:FBgn0005631]	341.911	0.96472	8.57789e-05	4.06662	531.398	397.45	330.092	185.216	226.644
FBgn0003943	Ubi-p63E	protein_coding	Ubiquitin-63E [Source:FlyBase gene name;Acc:FBgn0003943]	1921.87	0.961684	2.04309e-10	9.68971	1933.52	2607.42	2503.47	1225.27	1147.78
FBgn0259748	CG42397	protein_coding		6864.75	0.955475	1.05113e-07	6.97834	9871.56	9482.15	10251.7	4560.25	5436.34
FBgn0041180	Tep4	protein_coding	Thioester-containing protein 4 [Source:FlyBase gene name;Acc:FBgn0041180]	2344.32	0.954649	2.40416e-06	5.61904	3356.68	2437.5	2125.99	1245	1401.45
FBgn0004647	N	protein_coding	Notch [Source:FlyBase gene name;Acc:FBgn0004647]	144.207	0.954264	1.39845e-05	4.85435	240.547	198.725	204.265	99.7315	115.401
FBgn0035767	CG8596	protein_coding		1251.63	0.950785	4.22685e-15	14.374	1190.84	1214.43	1175.75	589.621	631.069
FBgn0032387	CG16965	protein_coding		1620.5	0.95041	0.000116539	3.93353	2378.03	1489	1249.28	804.427	885.784
FBgn0025625	Sik2	protein_coding	Salt-inducible kinase 2 [Source:FlyBase gene name;Acc:FBgn0025625]	90.191	0.949617	0.000301876	3.52017	128.048	150.724	120.925	61.3732	71.736
FBgn0020508	Ag5r2	protein_coding	Antigen 5-related 2 [Source:FlyBase gene name;Acc:FBgn0020508]	7121.05	0.948796	8.60847e-07	6.06507	5399.04	7138.73	8433.69	3274.7	3783.3
FBgn0035517	CG1265	protein_coding		718.664	0.947544	2.96314e-13	12.5282	884.443	841.94	893.864	447.148	448.09
FBgn0033453	CG1667	protein_coding		629.531	0.945747	3.72504e-11	10.4289	766.457	765.138	788.463	419.749	372.196
FBgn0029128	tyn	protein_coding	trynity [Source:FlyBase gene name;Acc:FBgn0029128]	68.1878	0.942591	0.00126598	2.89757	102.438	99.8424	102.132	47.1259	54.0619
FBgn0267795	CG32138	protein_coding		309.101	0.939045	1.0328e-05	4.98598	498.471	414.73	442.029	215.902	243.279
FBgn0041087	wun2	protein_coding	wunen-2 [Source:FlyBase gene name;Acc:FBgn0041087]	116.556	0.938798	0.00032246	3.49152	194.815	177.604	195.277	94.2517	96.6877
FBgn0264089	sli	protein_coding	slit [Source:FlyBase gene name;Acc:FBgn0264089]	793.654	0.935656	3.30783e-12	11.4805	1262.18	1337.31	1360.4	611.54	755.827
FBgn0015541	sda	protein_coding	slamdance [Source:FlyBase gene name;Acc:FBgn0015541]	1798.81	0.930287	1.39066e-06	5.85678	2678.03	2408.7	2224.85	1059.78	1438.88
FBgn0015391	glu	protein_coding	gluon [Source:FlyBase gene name;Acc:FBgn0015391]	98.3058	0.928733	0.000401731	3.39606	124.389	154.564	133.181	72.3327	66.5378
FBgn0052115	CG32115	protein_coding		412.391	0.927704	1.03994e-06	5.98299	382.314	552.013	491.87	233.437	253.675
FBgn0011726	tsr	protein_coding	twinstar [Source:FlyBase gene name;Acc:FBgn0011726]	9026.99	0.925332	3.26752e-14	13.4858	10760.6	10528.6	11453.5	5509.34	5870.92
FBgn0035904	GstO3	protein_coding	Glutathione S transferase O3 [Source:FlyBase gene name;Acc:FBgn0035904]	2471.44	0.922344	4.22685e-15	14.374	2842.66	2645.82	2970.83	1453.23	1493.98
FBgn0030318	rho-4	protein_coding	rhomboid-4 [Source:FlyBase gene name;Acc:FBgn0030318]	1485.78	0.917197	8.10455e-11	10.0913	2003.95	1711.72	1831.03	952.381	980.392
FBgn0035996	CG3448	protein_coding		84.4442	0.911433	0.00106104	2.97427	90.548	90.2422	88.2425	52.6056	37.4275
FBgn0004391	shtd	protein_coding	shattered [Source:FlyBase gene name;Acc:FBgn0004391]	365.308	0.909759	1.17274e-07	6.9308	490.24	449.291	389.738	235.629	227.684
FBgn0033945	CG12868	protein_coding		483.399	0.902696	9.51438e-09	8.02162	659.445	594.254	573.576	320.017	321.253
FBgn0032005	Snx6	protein_coding	Sorting nexin 6 [Source:FlyBase gene name;Acc:FBgn0032005]	1337.86	0.900732	1.76395e-13	12.7535	1758.83	1568.68	1642.29	904.159	853.555
FBgn0265186	CG44251	protein_coding		2775.66	0.897347	1.81625e-05	4.74082	3065.83	3259.28	3637.55	1717.35	1750.78
FBgn0011554	etaTry	protein_coding	etaTrypsin [Source:FlyBase gene name;Acc:FBgn0011554]	1798.33	0.896439	3.0874e-11	10.5104	2194.19	2482.62	2770.65	1275.69	1364.02
FBgn0015336	CG15865	protein_coding		1634.69	0.891922	7.50652e-07	6.12456	2948.75	2014.13	2078.6	1265.82	1220.55
FBgn0025621	CG16989	protein_coding		1772.38	0.890868	3.14051e-07	6.503	1724.07	2062.13	2027.94	1086.09	969.996
FBgn0034389	Mctp	protein_coding	Multiple C2 domain and transmembrane region protein [Source:FlyBase gene name;Acc:FBgn0034389]	268.825	0.890749	3.96505e-05	4.40175	378.655	362.889	406.079	172.064	229.763
FBgn0030122	CG16892	protein_coding		74.5586	0.888424	0.00139538	2.85531	97.865	86.4021	89.8766	47.1259	46.7844
FBgn0036320	CG10943	protein_coding		2363.83	0.887251	1.82882e-05	4.73783	3919.17	3024.07	3184.9	1623.1	1942.07
FBgn0039016	Dcr-1	protein_coding	Dicer-1 [Source:FlyBase gene name;Acc:FBgn0039016]	425.347	0.886757	7.02744e-09	8.1532	460.057	468.491	439.578	221.382	264.072
FBgn0037810	sle	protein_coding	slender lobes [Source:FlyBase gene name;Acc:FBgn0037810]	210.758	0.886129	1.81949e-05	4.74005	306.4	278.407	291.69	144.665	164.265
FBgn0264815	Pde1c	protein_coding		345.434	0.882931	0.000153579	3.81367	582.617	435.85	357.055	227.958	253.675
FBgn0033434	CG1902	protein_coding		2254.44	0.882875	6.32074e-17	16.1992	2592.96	2570.94	2554.13	1417.06	1352.59
FBgn0051720	mthl15	protein_coding	methuselah-like 15 [Source:FlyBase gene name;Acc:FBgn0051720]	757.129	0.881715	1.15108e-13	12.9389	1063.71	1056.99	1137.35	570.99	598.84
FBgn0028683	spt4	protein_coding	spt4 [Source:FlyBase gene name;Acc:FBgn0028683]	110.661	0.879437	0.000398534	3.39953	118.901	144.963	151.156	72.3327	72.7757
FBgn0053198	pen-2	protein_coding	presenilin enhancer [Source:FlyBase gene name;Acc:FBgn0053198]	123.389	0.878981	0.000153579	3.81367	128.962	131.523	142.985	77.8125	63.4188
FBgn0033304	Cyp6a13	protein_coding	Cyp6a13 [Source:FlyBase gene name;Acc:FBgn0033304]	876.713	0.873925	7.47568e-12	11.1263	1167.06	1090.59	1020.51	591.813	589.483
FBgn0036837	CG18135	protein_coding		6118.72	0.872998	1.58514e-07	6.79993	5394.46	8132.35	7124.76	3863.22	3532.74
FBgn0034184	CG9646	protein_coding		642.495	0.872482	2.16675e-06	5.66419	906.394	672.976	677.343	389.062	414.821
FBgn0020764	Alas	protein_coding	Aminolevulinate synthase [Source:FlyBase gene name;Acc:FBgn0020764]	1410.52	0.870851	1.30883e-13	12.8831	1298.77	1342.11	1407.79	723.327	738.153
FBgn0010278	Ssrp	protein_coding	Structure specific recognition protein [Source:FlyBase gene name;Acc:FBgn0010278]	548.579	0.86877	2.31557e-08	7.63534	619.202	602.894	584.198	321.113	328.53
FBgn0035023	ITP	protein_coding	Ion transport peptide [Source:FlyBase gene name;Acc:FBgn0035023]	347.679	0.868735	3.24705e-05	4.48851	394.204	499.212	455.919	189.599	290.063
FBgn0010173	RpA-70	protein_coding	Replication Protein A 70 [Source:FlyBase gene name;Acc:FBgn0010173]	709.464	0.867655	1.41372e-10	9.84964	788.408	714.257	689.599	415.365	375.315
FBgn0264776	CG44014	protein_coding		5852.89	0.864538	3.82153e-06	5.41776	8810.59	8989.66	11029.5	5097.26	5313.66
FBgn0037897	CG5270	protein_coding		928.731	0.864146	1.02929e-09	8.98746	968.589	1014.74	949.424	537.016	523.985
FBgn0004362	HmgD	protein_coding	High mobility group protein D [Source:FlyBase gene name;Acc:FBgn0004362]	444.173	0.860888	0.00130953	2.88289	895.419	515.532	567.04	352.896	347.244
FBgn0028932	CG16890	protein_coding		229.119	0.852955	0.00103383	2.98555	227.742	247.686	266.362	113.979	147.631
FBgn0264672	Eogt	protein_coding	EGF-domain O-GlcNAc transferase [Source:FlyBase gene name;Acc:FBgn0264672]	155.161	0.848163	0.000540258	3.2674	182.011	182.404	142.985	92.0598	89.4101
FBgn0039316	CG11893	protein_coding		904.148	0.845648	1.12775e-08	7.94779	1414.01	1497.64	1309.75	784.7	770.383
FBgn0052109	CG32109	protein_coding		126.039	0.845595	0.00026214	3.58147	131.706	151.684	130.73	67.9489	80.0533
FBgn0033139	Tsp42Er	protein_coding	Tetraspanin 42Er [Source:FlyBase gene name;Acc:FBgn0033139]	1769.82	0.840993	4.93232e-09	8.30695	2346.93	1847.08	2085.95	1137.6	1170.65
FBgn0058178	CG40178	protein_coding		392.96	0.840535	1.57381e-06	5.80305	481.093	601.934	576.027	272.892	335.808
FBgn0023530	CG3740	protein_coding		293.958	0.840194	6.74405e-05	4.17108	226.827	322.568	311.3	145.761	165.305
FBgn0038179	CG9312	protein_coding		462.974	0.840067	7.02298e-06	5.15348	470.118	510.732	460.822	260.836	264.072
FBgn0031253	CG11885	protein_coding		128.977	0.839023	0.000269007	3.57024	178.352	158.404	185.473	94.2517	95.648
FBgn0039508	CG3368	protein_coding		699.632	0.836068	8.15052e-09	8.08881	739.018	847.7	747.61	421.941	439.773
FBgn0046296	CG11534	protein_coding		275.207	0.833931	1.41942e-05	4.84789	254.266	295.687	303.946	163.297	148.67
FBgn0038948	PSR	protein_coding	phosphatidylserine receptor [Source:FlyBase gene name;Acc:FBgn0038948]	828.517	0.831519	4.81207e-09	8.31767	850.602	903.382	900.4	514.001	469.923
FBgn0034527	CG9945	protein_coding		353.457	0.830583	3.27395e-06	5.48493	438.106	351.368	358.689	213.71	207.931
FBgn0025885	Inos	protein_coding	Inos [Source:FlyBase gene name;Acc:FBgn0025885]	1391.65	0.828131	4.75977e-12	11.3224	1670.11	1698.28	1688.86	882.24	1000.15
FBgn0030040	CG15347	protein_coding		8691.15	0.825265	1.40107e-07	6.85354	10735.9	9824.88	11630	5952.11	5995.68
FBgn0039532	Mtl	protein_coding	Mig-2-like [Source:FlyBase gene name;Acc:FBgn0039532]	179.583	0.823211	0.000684861	3.1644	289.022	235.206	229.594	124.938	150.75
FBgn0030603	CG5541	protein_coding		2871.21	0.821651	9.86686e-10	9.00582	3878.01	3550.17	3575.45	2003.4	2106.34
FBgn0086346	ALiX	protein_coding	ALG-2 interacting protein X [Source:FlyBase gene name;Acc:FBgn0086346]	2475.08	0.818949	1.00987e-09	8.99573	3192.96	2770.63	2789.44	1640.64	1632.25
FBgn0033635	CG7777	protein_coding		841.519	0.813071	1.49176e-10	9.8263	910.053	1051.23	1013.97	574.278	544.778
FBgn0036126	CG6272	protein_coding		170.303	0.8095	7.05917e-05	4.15125	169.206	174.724	185.473	89.8679	106.045
FBgn0052476	mthl14	protein_coding	methuselah-like 14 [Source:FlyBase gene name;Acc:FBgn0052476]	1191.82	0.807006	1.33704e-09	8.87385	1572.24	1561.96	1611.24	859.225	932.568
FBgn0010226	GstS1	protein_coding	Glutathione S transferase S1 [Source:FlyBase gene name;Acc:FBgn0010226]	1327.26	0.806771	0.000575135	3.24023	773.774	1147.23	1246.02	588.525	572.849
FBgn0031306	CG4577	protein_coding		445.876	0.80337	8.25343e-05	4.08337	795.725	764.178	750.061	437.284	433.535
FBgn0011674	insc	protein_coding	inscuteable [Source:FlyBase gene name;Acc:FBgn0011674]	430.715	0.803156	3.29112e-06	5.48266	731.701	617.295	629.953	360.568	385.711
FBgn0020930	Dgkepsilon	protein_coding	Diacyl glycerol kinase epsilon [Source:FlyBase gene name;Acc:FBgn0020930]	280.437	0.802438	0.000754769	3.12219	257.925	410.89	397.908	203.847	193.375
FBgn0000615	exu	protein_coding	exuperantia [Source:FlyBase gene name;Acc:FBgn0000615]	132.955	0.802029	0.000971743	3.01245	141.767	156.484	144.62	88.772	74.855
FBgn0039003	wfs1	protein_coding	wolfram syndrome 1 [Source:FlyBase gene name;Acc:FBgn0039003]	187.478	0.796558	1.92383e-05	4.71583	198.474	202.565	203.448	112.883	114.362
FBgn0051004	mesh	protein_coding	mesh [Source:FlyBase gene name;Acc:FBgn0051004]	23827.2	0.796031	8.95498e-09	8.04794	34474.1	29396.9	30616.1	17974.7	17949.6
FBgn0050007	CG30007	protein_coding		251.982	0.795094	0.000359607	3.44417	231.4	286.087	280.252	117.267	179.86
FBgn0036332	CG11261	protein_coding		317.003	0.794517	0.000123448	3.90852	416.155	516.492	475.529	258.644	272.389
FBgn0024986	CG3719	protein_coding		1590.38	0.793603	1.05117e-07	6.97833	2135.65	1893.17	2045.92	1164.99	1144.66
FBgn0019972	Drice	protein_coding	Death related ICE-like caspase [Source:FlyBase gene name;Acc:FBgn0019972]	417.585	0.792268	1.92773e-05	4.71495	556.093	399.37	473.895	284.947	254.715
FBgn0003346	RanGAP	protein_coding	Ran GTPase activating protein [Source:FlyBase gene name;Acc:FBgn0003346]	224.042	0.790127	0.000565457	3.2476	251.522	243.846	275.349	136.994	151.789
FBgn0028381	Decay	protein_coding	Death executioner caspase related to Apopain/Yama [Source:FlyBase gene name;Acc:FBgn0028381]	5244.64	0.788653	4.01792e-13	12.396	6211.23	5729.42	6338.75	3576.09	3431.89
FBgn0003978	vls	protein_coding	valois [Source:FlyBase gene name;Acc:FBgn0003978]	119.968	0.788446	0.000825288	3.08339	128.962	131.523	143.803	67.9489	83.1722
FBgn0262976	lawc	protein_coding	leg arista wing complex [Source:FlyBase gene name;Acc:FBgn0262976]	152.231	0.7867	0.000282399	3.54914	177.437	179.524	212.436	100.827	114.362
FBgn0003118	pnt	protein_coding	pointed [Source:FlyBase gene name;Acc:FBgn0003118]	731.139	0.78658	3.09512e-10	9.50932	975.906	982.104	920.009	543.591	559.333
FBgn0036372	Abp1	protein_coding	Actin binding protein 1 [Source:FlyBase gene name;Acc:FBgn0036372]	1317.57	0.786397	5.85366e-10	9.23257	1571.33	1470.76	1542.61	862.513	893.062
FBgn0033787	CG13321	protein_coding		11963.5	0.786267	4.82374e-06	5.31662	13294.1	14372.5	16055.2	8215.24	8429.5
FBgn0033929	Tfb1	protein_coding	TFB1 ortholog (S. cerevisiae) [Source:FlyBase gene name;Acc:FBgn0033929]	744.019	0.785146	4.51793e-08	7.34506	759.14	856.341	796.633	441.668	481.359
FBgn0001297	kay	protein_coding	kayak [Source:FlyBase gene name;Acc:FBgn0001297]	2684.15	0.781491	0.000808983	3.09206	3209.42	3600.09	3531.33	1993.53	1914
FBgn0038953	CG18596	protein_coding		322.509	0.778434	2.46946e-06	5.6074	378.655	384.969	350.519	200.559	225.605
FBgn0032633	Lrch	protein_coding	Leucine-rich-repeats and calponin homology domain protein [Source:FlyBase gene name;Acc:FBgn0032633]	544.675	0.777212	1.80839e-07	6.74271	809.444	820.82	723.098	455.915	450.17
FBgn0030347	CG15739	protein_coding		1577.84	0.770073	4.52083e-05	4.34478	2477.72	1729	1974.83	1202.26	1172.73
FBgn0086370	sra	protein_coding	sarah [Source:FlyBase gene name;Acc:FBgn0086370]	631.684	0.768657	4.86444e-08	7.31297	576.214	678.736	593.185	364.951	349.323
FBgn0003514	sqh	protein_coding	spaghetti squash [Source:FlyBase gene name;Acc:FBgn0003514]	3140.87	0.768653	3.50775e-13	12.455	3747.22	3989.86	4162.1	2247.79	2381.84
FBgn0039319	CG13659	protein_coding		607.857	0.767906	0.000578464	3.23772	627.433	669.136	545.796	366.047	334.768
FBgn0265101	Sgt1	protein_coding	suppressor-of-G2-allele-of-skp1 [Source:FlyBase gene name;Acc:FBgn0265101]	643.689	0.765178	0.000518515	3.28524	506.703	790.099	854.645	418.653	404.425
FBgn0037092	M6	protein_coding	M6 [Source:FlyBase gene name;Acc:FBgn0037092]	624.446	0.764244	0.000132407	3.87809	687.799	795.859	794.999	453.723	423.139
FBgn0034295	CG10911	protein_coding		111363	0.763273	3.39293e-06	5.46943	116227	147743	160779	77545	87197.7
FBgn0034718	wdp	protein_coding	windpipe [Source:FlyBase gene name;Acc:FBgn0034718]	6533.76	0.761049	7.5599e-11	10.1215	7144.14	7739.71	7150.09	4246.81	4356.14
FBgn0024361	Tsp2A	protein_coding	Tetraspanin 2A [Source:FlyBase gene name;Acc:FBgn0024361]	4122.75	0.760764	5.48537e-07	6.26079	5153.92	4623.47	5549.47	2887.83	3073.21
FBgn0030245	CG1637	protein_coding		2871.13	0.759774	5.31475e-05	4.27452	3383.2	3220.88	3134.24	1924.49	1837.07
FBgn0037901	CG6744	protein_coding		302.479	0.758378	0.00050231	3.29903	289.936	378.249	342.348	173.16	215.208
FBgn0038535	alt	protein_coding	aluminum tubes [Source:FlyBase gene name;Acc:FBgn0038535]	3103.96	0.75827	2.19397e-08	7.65877	3343.87	3794.97	3647.36	2077.92	2132.33
FBgn0015036	Cyp4ae1	protein_coding	Cytochrome P450-4ae1 [Source:FlyBase gene name;Acc:FBgn0015036]	1448.63	0.75759	1.81401e-06	5.74136	1650.9	1345.95	1232.94	849.361	797.414
FBgn0038046	CG5641	protein_coding		230.444	0.757355	1.36636e-05	4.86443	263.412	279.367	252.472	153.433	154.908
FBgn0010288	Uch	protein_coding	Ubiquitin carboxy-terminal hydrolase [Source:FlyBase gene name;Acc:FBgn0010288]	807.074	0.75427	2.08382e-09	8.68114	912.797	936.022	1018.87	556.743	567.65
FBgn0260799	p120ctn	protein_coding	Adherens junction protein p120 [Source:FlyBase gene name;Acc:FBgn0260799]	629.649	0.750758	1.56494e-08	7.8055	733.53	879.381	782.743	463.587	477.201
FBgn0030993	Mec2	protein_coding	Mec2 [Source:FlyBase gene name;Acc:FBgn0030993]	3882.61	0.749842	3.44023e-11	10.4634	4338.07	3835.29	4060.79	2334.37	2481.65
FBgn0051436	CG31436	protein_coding		379.94	0.748506	0.000110453	3.95682	428.045	379.209	375.848	240.013	219.367
FBgn0033134	Tsp42El	protein_coding	Tetraspanin 42El [Source:FlyBase gene name;Acc:FBgn0033134]	275.669	0.747652	0.00108548	2.96438	415.24	441.611	518.833	234.533	302.539
FBgn0036764	CG5535	protein_coding		620.401	0.746284	2.07645e-05	4.68268	533.227	530.893	422.42	293.715	284.865
FBgn0014020	Rho1	protein_coding	Rho1 [Source:FlyBase gene name;Acc:FBgn0014020]	6930.01	0.743811	9.46655e-13	12.0238	8227.98	8713.17	8619.98	4939.45	5179.55
FBgn0030263	CG2076	protein_coding		1879.57	0.742125	1.93195e-11	10.714	1824.68	1996.85	2111.28	1164.99	1184.16
FBgn0038168	omd	protein_coding	oocyte maintenance defects [Source:FlyBase gene name;Acc:FBgn0038168]	373.764	0.739791	0.000252682	3.59743	363.107	485.772	465.724	264.124	251.596
FBgn0260444	Not10	protein_coding		313.6	0.73745	3.96933e-05	4.40128	282.619	332.168	346.433	179.736	198.574
FBgn0031535	CG12795	protein_coding		218.327	0.73626	0.000565457	3.2476	205.791	230.406	275.349	131.514	146.591
FBgn0033122	CG17002	protein_coding		176.42	0.736124	0.000570364	3.24385	199.388	210.245	236.13	126.034	126.838
FBgn0266186	Vamp7	protein_coding	Vesicle-associated membrane protein 7 [Source:FlyBase gene name;Acc:FBgn0266186]	875.142	0.734468	3.95016e-09	8.40339	988.711	1034.9	1158.59	643.323	622.752
FBgn0034335	GstE1	protein_coding	Glutathione S transferase E1 [Source:FlyBase gene name;Acc:FBgn0034335]	984.331	0.730109	9.15872e-06	5.03817	397.862	473.291	520.467	281.659	265.111
FBgn0034399	CG15083	protein_coding		192.04	0.730105	0.000369411	3.43249	272.559	262.086	280.252	158.913	163.225
FBgn0051104	CG31104	protein_coding		1240.56	0.729956	6.24245e-05	4.20464	1671.94	1391.07	1191.27	839.498	843.158
FBgn0034577	cpa	protein_coding	capping protein alpha [Source:FlyBase gene name;Acc:FBgn0034577]	2296.73	0.729934	1.2995e-07	6.88622	2913.08	2824.39	2904.65	1735.98	1706.07
FBgn0065032	Arpc3B	protein_coding	Actin-related protein 2/3 complex, subunit 3B [Source:FlyBase gene name;Acc:FBgn0065032]	1309.87	0.729095	1.61804e-06	5.79101	1365.54	1575.4	1837.57	985.259	915.934
FBgn0035926	CG5804	protein_coding		11442.7	0.727334	1.87863e-07	6.72616	11065.1	13161.9	13144.9	7185.05	7709.02
FBgn0025676	CkIIalpha-i3	protein_coding	CKII-alpha subunit interactor-3 [Source:FlyBase gene name;Acc:FBgn0025676]	195.838	0.725433	6.76261e-05	4.16989	256.095	271.687	279.434	164.393	159.067
FBgn0264707	RhoGEF3	protein_coding	Rho guanine nucleotide exchange factor 3 [Source:FlyBase gene name;Acc:FBgn0264707]	274.707	0.72437	9.0206e-06	5.04476	359.448	369.609	344.799	220.286	207.931
FBgn0266362	CR45010	lincRNA		209.13	0.719455	0.000528702	3.27679	196.645	212.165	261.459	130.418	136.194
FBgn0039920	CG11360	protein_coding		236.06	0.719015	0.000803063	3.09525	273.473	368.649	279.434	173.16	192.336
FBgn0033015	d4	protein_coding	d4 [Source:FlyBase gene name;Acc:FBgn0033015]	388.32	0.707849	9.77868e-06	5.00972	448.167	488.652	513.114	284.947	300.46
FBgn0028411	Nxt1	protein_coding	NTF2-related export protein 1 [Source:FlyBase gene name;Acc:FBgn0028411]	151.749	0.706604	0.000942781	3.02559	156.401	145.923	163.412	97.5396	88.3705
FBgn0011704	RnrS	protein_coding	Ribonucleoside diphosphate reductase small subunit [Source:FlyBase gene name;Acc:FBgn0011704]	786.112	0.704977	0.000390073	3.40885	1178.95	1122.27	1296.67	729.903	721.519
FBgn0032805	CG10337	protein_coding		406.812	0.70451	3.42738e-05	4.46504	460.057	506.892	477.98	297.002	285.904
FBgn0031078	Nup205	protein_coding	Nucleoporin 205kD [Source:FlyBase gene name;Acc:FBgn0031078]	449.687	0.702821	4.18309e-06	5.3785	481.093	528.013	482.882	282.755	321.253
FBgn0015296	Shc	protein_coding	SHC-adaptor protein [Source:FlyBase gene name;Acc:FBgn0015296]	321.45	0.70252	0.000671662	3.17285	409.752	370.569	399.542	221.382	252.636
FBgn0029826	CG6041	protein_coding		1116.73	0.700808	4.06554e-07	6.39088	1382	1156.83	1277.06	756.206	794.295
FBgn0027794	CG14786	protein_coding		883.186	0.697089	5.60086e-06	5.25175	914.626	849.62	919.192	533.728	558.293
FBgn0037236	Skp2	protein_coding		166.15	0.693917	0.000574791	3.24049	189.328	202.565	210.801	117.267	126.838
FBgn0263930	dally	protein_coding	division abnormally delayed [Source:FlyBase gene name;Acc:FBgn0263930]	1970.39	0.689534	4.06943e-07	6.39047	2545.4	2359.74	2146.42	1367.75	1521.01
FBgn0037882	CG17187	protein_coding		56.3268	0.689452	0.049922	1.30171	52.1337	55.6813	60.4624	30.6866	34.3085
FBgn0035825	CG8111	protein_coding		328.389	0.688015	0.000230314	3.63768	272.559	284.167	282.703	154.529	185.058
FBgn0015663	Dot	protein_coding	Dorothy [Source:FlyBase gene name;Acc:FBgn0015663]	599.717	0.687376	3.2986e-08	7.48167	789.322	710.417	737.805	452.627	467.844
FBgn0037065	CG12974	protein_coding		7347.32	0.687235	2.06187e-07	6.68574	9026.44	9271.9	10156.9	5865.52	5828.29
FBgn0004657	mys	protein_coding	myospheroid [Source:FlyBase gene name;Acc:FBgn0004657]	3724.27	0.686424	2.13781e-05	4.67003	5179.53	4764.59	4752.02	2913.04	3108.56
FBgn0024196	robl	protein_coding	roadblock [Source:FlyBase gene name;Acc:FBgn0024196]	670.113	0.685087	5.88906e-05	4.22995	742.676	675.856	871.803	418.653	518.787
FBgn0264975	Nrg	protein_coding	Neuroglian [Source:FlyBase gene name;Acc:FBgn0264975]	599.661	0.684668	0.000212505	3.67263	828.651	781.459	890.595	432.9	590.523
FBgn0263864	Dark	protein_coding	Death-associated APAF1-related killer [Source:FlyBase gene name;Acc:FBgn0263864]	402.167	0.684537	0.000111013	3.95463	429.874	593.294	542.528	317.826	323.332
FBgn0042174	CR18854	pseudogene		3854.92	0.682446	3.12911e-05	4.50458	3730.76	4868.28	4667.05	2872.49	2587.7
FBgn0060296	pain	protein_coding	painless [Source:FlyBase gene name;Acc:FBgn0060296]	411.606	0.682087	0.00116677	2.93301	635.665	532.813	468.992	316.73	351.403
FBgn0002641	mal	protein_coding	maroon-like [Source:FlyBase gene name;Acc:FBgn0002641]	657.856	0.678585	9.69335e-05	4.01353	509.447	637.455	602.173	364.951	351.403
FBgn0031643	CG3008	protein_coding		646.582	0.678161	1.79303e-05	4.74641	756.396	590.414	589.1	390.158	405.465
FBgn0031988	CG8668	protein_coding		968.1	0.677825	4.95496e-08	7.30496	1160.66	1390.11	1343.25	826.346	787.017
FBgn0262731	pncr013:4	lincRNA	putative noncoding RNA 013:4 [Source:FlyBase gene name;Acc:FBgn0262731]	271.024	0.677673	0.00060029	3.22164	294.51	384.969	329.275	200.559	213.129
FBgn0051678	CG31678	protein_coding		780.127	0.67716	0.000235759	3.62753	763.713	916.822	910.205	547.975	516.707
FBgn0261574	kug	protein_coding	kugelei [Source:FlyBase gene name;Acc:FBgn0261574]	1246.47	0.676998	1.65087e-07	6.78229	1432.3	1521.64	1397.99	924.982	875.388
FBgn0037376	CG2051	protein_coding		200.249	0.676651	0.000922701	3.03494	224.083	266.886	267.996	149.049	162.186
FBgn0027620	Acf1	protein_coding	ATP-dependent chromatin assembly factor large subunit [Source:FlyBase gene name;Acc:FBgn0027620]	264.659	0.673458	0.000253579	3.59589	352.131	319.688	308.849	190.695	213.129
FBgn0036766	CG5506	protein_coding		21206.2	0.671554	0.000231772	3.63494	28240.9	18634	20647.9	13428.7	14403.3
FBgn0036099	CG11811	protein_coding		238.86	0.66973	0.000496166	3.30437	235.059	208.325	232.862	128.226	149.71
FBgn0037084	Syx6	protein_coding	Syntaxin 6 [Source:FlyBase gene name;Acc:FBgn0037084]	693.257	0.668672	8.84658e-07	6.05322	738.103	822.74	795.816	494.273	485.518
FBgn0040475	SH3PX1	protein_coding	SH3PX1 ortholog (H. sapiens) [Source:FlyBase gene name;Acc:FBgn0040475]	1821.95	0.667321	8.25545e-05	4.08326	1936.26	2062.13	2398.89	1335.96	1316.2
FBgn0265434	zip	protein_coding	zipper [Source:FlyBase gene name;Acc:FBgn0265434]	7942.66	0.661626	1.07843e-07	6.96721	10494.4	10768.6	10504.1	6308.29	6996.86
FBgn0038881	CG16791	protein_coding		821.09	0.657638	2.34478e-06	5.6299	1214.62	1192.35	1241.11	689.353	842.119
FBgn0033889	CG6701	protein_coding		2385.63	0.654856	0.00139538	2.85531	3317.35	2419.26	2378.46	1680.09	1694.63
FBgn0052243	CG32243	protein_coding		211.423	0.650986	0.000659851	3.18055	252.437	285.127	319.47	184.12	175.701
FBgn0020388	Gcn5	protein_coding	Gcn5 ortholog [Source:FlyBase gene name;Acc:FBgn0020388]	657.469	0.650755	8.37758e-06	5.07688	771.03	663.376	622.6	439.476	425.218
FBgn0003391	shg	protein_coding	shotgun [Source:FlyBase gene name;Acc:FBgn0003391]	998.994	0.649076	1.04481e-06	5.98096	1364.62	1311.39	1272.98	839.498	827.564
FBgn0034964	IntS1	protein_coding	Integrator 1 [Source:FlyBase gene name;Acc:FBgn0034964]	907.5	0.648045	4.35437e-06	5.36107	923.772	1087.71	937.985	652.09	592.602
FBgn0027341	Gfat1	protein_coding	Glutamine:fructose-6-phosphate aminotransferase 1 [Source:FlyBase gene name;Acc:FBgn0027341]	1288.67	0.647918	7.82441e-05	4.10655	1842.97	1423.71	1378.38	1017.04	937.767
FBgn0015714	Cyp6a17	protein_coding	Cytochrome P450-6a17 [Source:FlyBase gene name;Acc:FBgn0015714]	640.89	0.647217	5.24958e-05	4.27988	602.739	629.775	520.467	386.87	349.323
FBgn0086446	l(2)37Ce	protein_coding	lethal (2) 37Ce [Source:FlyBase gene name;Acc:FBgn0086446]	230.291	0.64518	0.00020089	3.69704	255.181	263.046	282.703	173.16	164.265
FBgn0038680	Cyp12a5	protein_coding	Cyp12a5 [Source:FlyBase gene name;Acc:FBgn0038680]	1197.08	0.643605	0.000144697	3.83954	1456.08	1399.71	1269.71	900.871	839
FBgn0035515	CG14997	protein_coding		754.475	0.640947	6.52921e-08	7.18514	829.566	871.701	914.29	552.359	559.333
FBgn0261278	grp	protein_coding	grapes [Source:FlyBase gene name;Acc:FBgn0261278]	345.613	0.639449	0.000329534	3.4821	476.52	409.93	404.445	255.356	290.063
FBgn0267390	dop	protein_coding	drop out [Source:FlyBase gene name;Acc:FBgn0267390]	1541.55	0.636089	1.54964e-06	5.80977	1725.9	1680.04	1429.85	1036.77	1020.94
FBgn0014141	cher	protein_coding	cheerio [Source:FlyBase gene name;Acc:FBgn0014141]	1622.33	0.635033	2.59266e-08	7.58625	2356.99	2286.77	2317.18	1356.79	1617.7
FBgn0038292	CG3987	protein_coding		8137.58	0.631307	0.000168433	3.77357	9610.89	8687.25	8697.6	5723.05	5752.4
FBgn0043903	dome	protein_coding	domeless [Source:FlyBase gene name;Acc:FBgn0043903]	1179.65	0.630268	7.38465e-06	5.13167	1434.13	1583.08	1572.02	919.502	1042.77
FBgn0039056	CenB1A	protein_coding	Centaurin beta 1A [Source:FlyBase gene name;Acc:FBgn0039056]	499.336	0.629394	2.45061e-05	4.61073	545.117	572.174	614.429	353.992	385.711
FBgn0040551	CG11686	protein_coding		1011.44	0.628083	0.00019003	3.72118	1156.09	1196.19	1450.28	779.221	844.198
FBgn0001149	GstD1	protein_coding	Glutathione S transferase D1 [Source:FlyBase gene name;Acc:FBgn0001149]	9826.08	0.625906	3.44199e-10	9.46319	7211.83	7024.49	7192.58	4353.11	4848.94
FBgn0024754	Flo1	protein_coding	Flotillin 1 [Source:FlyBase gene name;Acc:FBgn0024754]	351.21	0.624696	8.4004e-05	4.0757	411.582	457.931	464.907	278.371	293.182
FBgn0031356	CG17660	protein_coding		1676.13	0.621058	5.14241e-09	8.28883	1990.23	2029.49	2121.9	1277.88	1372.34
FBgn0039969	Fis1	protein_coding		1076.08	0.620963	1.12924e-05	4.94721	1103.95	1322.91	1405.34	794.564	853.555
FBgn0029507	Tsp42Ed	protein_coding	Tetraspanin 42Ed [Source:FlyBase gene name;Acc:FBgn0029507]	4974.83	0.620854	5.76487e-07	6.23921	6798.42	5739.02	6025.82	4034.19	3966.27
FBgn0034894	CG4091	protein_coding		786.974	0.619786	3.64379e-05	4.43845	994.199	888.021	915.107	604.964	597.8
FBgn0035772	Sh3beta	protein_coding	Sh3beta [Source:FlyBase gene name;Acc:FBgn0035772]	1721.25	0.618005	2.1746e-05	4.66262	2228.94	2097.65	2213.42	1367.75	1450.32
FBgn0033582	CG9084	protein_coding		1077.78	0.617399	9.06352e-08	7.0427	1234.75	1219.23	1272.16	806.619	803.652
FBgn0040236	c11.1	protein_coding	c11.1 [Source:FlyBase gene name;Acc:FBgn0040236]	1636.12	0.615577	3.04413e-06	5.51654	1707.61	1991.09	1905.38	1249.38	1171.69
FBgn0034694	CG6613	protein_coding		382.008	0.614117	2.43623e-05	4.61328	435.362	474.251	445.298	276.179	308.777
FBgn0013305	Nmda1	protein_coding	N-methyl-D-aspartate receptor-associated protein [Source:FlyBase gene name;Acc:FBgn0013305]	2182.39	0.612944	5.94578e-09	8.22579	2695.4	2584.38	2564.75	1641.73	1762.21
FBgn0037174	CG14457	protein_coding		675.698	0.611172	0.000953309	3.02077	744.506	563.534	622.6	415.365	414.821
FBgn0036341	Syx13	protein_coding	Syntaxin 13 [Source:FlyBase gene name;Acc:FBgn0036341]	828.288	0.610141	0.00028603	3.54359	759.14	937.942	942.887	568.798	570.769
FBgn0034817	Art7	protein_coding	Arginine methyltransferase 7 [Source:FlyBase gene name;Acc:FBgn0034817]	254.099	0.607081	0.00130798	2.8834	304.57	278.407	244.301	176.448	180.9

## Sheet: Myo Down p≤0.001
Gene	Associated Gene Name	Gene type	Description	baseMean	log2FoldChange	padj	Transformed Padj	Myo_MPCi_1	Myo_MPCi_2	Myo_MPCi_3	mcherryi_myo_1	mcherryi_myo_3
FBgn0052379	CG32379	protein_coding		116.259	-5.12658	7.24599e-42	41.1399	0	0	0	147.953	187.137
FBgn0263219	Dscam4	protein_coding	Down syndrome cell adhesion molecule 4 [Source:FlyBase gene name;Acc:FBgn0263219]	126.469	-4.86596	5.49711e-55	54.2599	6.40238	3.84009	4.90236	241.109	247.437
FBgn0040104	lectin-24A	protein_coding	lectin-24A [Source:FlyBase gene name;Acc:FBgn0040104]	511.372	-3.65033	1.6839e-13	12.7737	68.597	10.5603	20.4265	1780.92	2099.06
FBgn0034582	Cht9	protein_coding	Cht9 [Source:FlyBase gene name;Acc:FBgn0034582]	2813.67	-3.5117	2.38719e-53	52.6221	791.152	646.095	700.22	10249.3	8628.08
FBgn0031461	daw	protein_coding	dawdle [Source:FlyBase gene name;Acc:FBgn0031461]	475.202	-3.37611	1.72055e-37	36.7643	169.206	89.2821	76.8036	1371.03	1434.72
FBgn0002939	ninaD	protein_coding	neither inactivation nor afterpotential D [Source:FlyBase gene name;Acc:FBgn0002939]	1311.29	-3.36999	1.04327e-15	14.9816	299.083	93.1222	182.204	3841.31	3678.29
FBgn0004430	LysS	protein_coding	Lysozyme S [Source:FlyBase gene name;Acc:FBgn0004430]	2080.87	-3.31223	8.74931e-47	46.058	683.226	359.049	481.248	5594.83	6117.32
FBgn0031791	AANATL2	protein_coding	Arylalkylamine N-acyltransferase-like 2 [Source:FlyBase gene name;Acc:FBgn0031791]	87.906	-3.30899	1.30327e-26	25.885	21.0364	17.2804	19.6094	222.478	282.786
FBgn0036023	CG18179	protein_coding		969.094	-3.25219	4.70439e-39	38.3275	111.584	123.843	102.132	1369.94	1136.34
FBgn0052581	CG32581	protein_coding		43.6275	-3.18256	1.62492e-13	12.7892	4.57313	15.3604	23.6947	229.054	203.772
FBgn0038799	CG4288	protein_coding		203.666	-2.98148	5.92928e-34	33.227	75.914	48.9612	49.8407	544.687	514.628
FBgn0037996	CG4830	protein_coding		1794.76	-2.92015	2.65245e-38	37.5764	311.887	537.613	481.248	3776.64	3739.63
FBgn0036927	CG7433	protein_coding		1075.66	-2.91885	2.95728e-28	27.5291	305.485	162.244	177.302	2038.47	1778.85
FBgn0034429	CG18607	protein_coding		38.0556	-2.91848	3.77219e-15	14.4234	12.8048	9.60023	4.90236	101.923	99.8067
FBgn0035412	CG14957	protein_coding		23.8915	-2.89139	1.35996e-09	8.86647	0.914626	1.92005	2.45118	36.1664	57.1809
FBgn0038484	CG5246	protein_coding		4013.74	-2.7913	5.24584e-39	38.2802	1637.18	1715.56	2168.48	13661	14691.3
FBgn0015035	Cyp4e3	protein_coding	Cytochrome P450-4e3 [Source:FlyBase gene name;Acc:FBgn0015035]	522.569	-2.74755	3.66198e-22	21.4363	335.668	218.885	137.266	1813.8	1923.36
FBgn0036024	CG18180	protein_coding		35181.4	-2.74162	1.64261e-122	121.784	10577.7	12610.9	10878.3	83194.7	72885.9
FBgn0085244	CG34215	protein_coding		44.2924	-2.60661	6.22924e-15	14.2056	17.3779	14.4003	18.7924	138.09	123.719
FBgn0036294	CG10654	protein_coding		31.1464	-2.60534	3.97303e-11	10.4009	5.48776	5.76014	8.1706	69.0449	51.9826
FBgn0053965	CG33965	protein_coding		584.141	-2.55093	2.06195e-37	36.6857	311.887	288.967	277.8	1877.36	1846.42
FBgn0036996	mag	protein_coding	magro [Source:FlyBase gene name;Acc:FBgn0036996]	9452.82	-2.55061	2.95659e-23	22.5292	3750.88	2440.38	1853.09	17947.3	17715.7
FBgn0052751	CG32751	protein_coding		1526.79	-2.53427	5.00744e-08	7.30038	83.231	356.169	373.396	3076.33	2982.76
FBgn0037546	mAChR-B	protein_coding	muscarinic Acetylcholine Receptor, B-type [Source:FlyBase gene name;Acc:FBgn0037546]	7.11359	-2.52849	1.75432e-06	5.75589	1.82925	2.88007	0.81706	39.4542	33.2689
FBgn0051741	CG31741	protein_coding		16.3217	-2.52104	8.21959e-07	6.08515	7.31701	1.92005	0.81706	37.2623	69.6567
FBgn0052364	CG32364	protein_coding		39.0427	-2.50739	2.96072e-12	11.5286	11.8901	12.4803	11.4388	95.3477	81.0929
FBgn0032913	CG9259	protein_coding		3382.77	-2.50155	4.61398e-24	23.3359	1596.94	1412.19	1193.72	10164.9	7755.81
FBgn0001077	ftz	protein_coding	fushi tarazu [Source:FlyBase gene name;Acc:FBgn0001077]	4.4243	-2.36176	1.65151e-06	5.78212	0	0	0	19.7271	27.031
FBgn0035666	Jon65Aii	protein_coding	Jonah 65Aii [Source:FlyBase gene name;Acc:FBgn0035666]	10414.7	-2.33462	5.87607e-24	23.2309	5321.29	3417.68	3572.19	22801.2	22718.5
FBgn0053346	CG33346	protein_coding		720.345	-2.2791	1.39079e-18	17.8567	548.776	315.848	268.813	2014.36	2140.64
FBgn0034253	CG10936	protein_coding		173.752	-2.27638	1.57784e-07	6.80194	0.914626	4.80012	7.35354	20.8231	54.0619
FBgn0039311	CG10513	protein_coding		3415.42	-2.26769	9.02968e-28	27.0443	1845.72	1224.03	1492.77	9175.29	6631.94
FBgn0039474	CG6283	protein_coding		2236.61	-2.20032	3.02015e-29	28.52	1638.1	1298.91	933.899	6564.74	6176.58
FBgn0002564	Lsp1gamma	protein_coding	Larval serum protein 1 gamma [Source:FlyBase gene name;Acc:FBgn0002564]	48.4945	-2.17106	2.85306e-11	10.5447	27.4388	21.1205	31.0483	165.488	122.679
FBgn0053508	ppk13	protein_coding	pickpocket 13 [Source:FlyBase gene name;Acc:FBgn0053508]	18.9673	-2.16171	1.0865e-05	4.96397	1.82925	7.68018	8.98766	64.6611	39.5068
FBgn0010241	Mdr50	protein_coding	Multi drug resistance 50 [Source:FlyBase gene name;Acc:FBgn0010241]	3069.68	-2.15099	1.29411e-17	16.888	1388.4	691.217	714.927	4516.41	4609.82
FBgn0024289	Sodh-1	protein_coding	Sorbitol dehydrogenase 1 [Source:FlyBase gene name;Acc:FBgn0024289]	500.913	-2.11572	1.06488e-10	9.9727	216.766	101.762	104.584	761.685	699.686
FBgn0031208	CG11023	protein_coding		7.58248	-2.11306	8.91413e-05	4.04992	2.74388	1.92005	0	19.7271	22.8724
FBgn0266702	CR45192	lincRNA		246.674	-2.10949	3.45437e-05	4.46163	137.194	24.9606	35.9506	601.677	600.919
FBgn0034783	CG9825	protein_coding		780.036	-2.09501	6.10812e-14	13.2141	230.486	211.205	211.619	1030.19	1071.88
FBgn0033289	CG2121	protein_coding		31.7402	-2.0438	1.22212e-07	6.91289	10.9755	9.60023	12.2559	66.853	53.0223
FBgn0053293	CG33293	protein_coding		19.743	-2.01188	5.48043e-06	5.26119	13.7194	9.60023	4.90236	54.7975	55.1016
FBgn0039472	CG17192	protein_coding		14812	-2.01055	2.51137e-07	6.60009	3419.79	4346.02	5572.35	24353.1	22331.7
FBgn0032869	CG17470	protein_coding		26.7004	-1.99664	4.86988e-05	4.31248	0.914626	0.960023	2.45118	14.2474	20.7931
FBgn0031860	CG11236	protein_coding		215.52	-1.9488	3.63574e-11	10.4394	131.706	74.8818	84.1572	407.693	446.011
FBgn0031034	CG14205	protein_coding		5052.86	-1.9302	2.43742e-14	13.6131	5036.85	2374.14	3361.38	15021.1	15457.6
FBgn0041241	Gr47b	protein_coding	Gustatory receptor 47b [Source:FlyBase gene name;Acc:FBgn0041241]	4.99518	-1.92822	0.000427845	3.36871	0.914626	0.960023	1.63412	20.8231	14.5551
FBgn0026755	Ugt37b1	protein_coding	UDP-glycosyltransferase 37b1 [Source:FlyBase gene name;Acc:FBgn0026755]	200.381	-1.91489	5.74245e-09	8.2409	145.426	53.7613	77.6207	415.365	406.504
FBgn0039769	CG15534	protein_coding		7050.42	-1.91129	6.60557e-23	22.1801	4439.59	6198.87	6109.16	22574.4	22225.7
FBgn0004425	LysB	protein_coding	Lysozyme B [Source:FlyBase gene name;Acc:FBgn0004425]	8166.66	-1.90941	5.04628e-07	6.29703	4417.64	2340.54	3173.46	15893.5	15632.2
FBgn0035781	CG8560	protein_coding		9556.92	-1.90085	5.12165e-18	17.2906	5013.98	6973.61	7196.66	26792.7	24785.3
FBgn0026563	CG1979	protein_coding		34.1501	-1.89094	4.23998e-05	4.37264	8.23163	4.80012	4.90236	32.8785	38.4671
FBgn0265851	CR44640	lincRNA		15.8525	-1.88918	0.000144763	3.83934	4.57313	0.960023	1.63412	19.7271	17.6741
FBgn0263748	CG43673	protein_coding		4138.19	-1.88192	1.5609e-17	16.8066	1482.61	2287.73	2682.41	9231.19	7751.65
FBgn0003356	Jon99Cii	protein_coding	Jonah 99Cii [Source:FlyBase gene name;Acc:FBgn0003356]	48594.5	-1.87194	6.98689e-13	12.1557	17282.8	20533	21599.8	85246.3	73625.1
FBgn0039801	Npc2h	protein_coding	Niemann-Pick type C-2h [Source:FlyBase gene name;Acc:FBgn0039801]	36.1505	-1.87172	7.5746e-06	5.12064	10.9755	5.76014	4.0853	43.838	29.1103
FBgn0004427	LysD	protein_coding	Lysozyme D [Source:FlyBase gene name;Acc:FBgn0004427]	26324.7	-1.86445	7.8512e-05	4.10506	13458.7	5285.89	7898.52	48914.4	51386.9
FBgn0039312	CG10514	protein_coding		4617.13	-1.86335	7.2959e-28	27.1369	2234.43	2469.18	2504.29	9734.23	8469.01
FBgn0034605	CG15661	protein_coding		152.109	-1.85986	1.98437e-07	6.70238	48.4752	22.0805	14.7071	138.09	112.282
FBgn0265345	CR44299	lincRNA		13.509	-1.85772	0.000115078	3.93901	10.9755	6.72016	10.6218	50.4137	50.943
FBgn0015033	Cyp4d8	protein_coding	Cytochrome P450-4d8 [Source:FlyBase gene name;Acc:FBgn0015033]	455.995	-1.84744	2.85146e-22	21.5449	307.314	225.605	200.18	944.709	905.537
FBgn0037684	CG8129	protein_coding		270.918	-1.83003	2.60402e-23	22.5844	154.572	131.523	129.095	524.96	504.232
FBgn0036731	CG6333	protein_coding		11.029	-1.82031	0.000270638	3.56761	6.40238	4.80012	6.53648	33.9745	33.2689
FBgn0032068	CG9466	protein_coding		17140	-1.81752	1.12893e-13	12.9473	5873.73	9271.9	5166.27	27169.7	24454.7
FBgn0038662	Mpc1	protein_coding	Mitochondrial pyruvate carrier [Source:FlyBase gene name;Acc:FBgn0038662]	1209.11	-1.81453	4.71301e-27	26.3267	840.541	802.579	819.511	3113.59	2935.98
FBgn0039313	CG11892	protein_coding		8942.16	-1.81111	7.03103e-26	25.153	3759.11	3901.53	3809.13	15226	12643.2
FBgn0036821	CG3961	protein_coding		1040.13	-1.79742	2.22554e-28	27.6526	965.845	764.178	665.087	2968.93	2809.14
FBgn0087002	Rfabg	protein_coding	Retinoid- and fatty acid-binding glycoprotein [Source:FlyBase gene name;Acc:FBgn0087002]	2057.17	-1.79457	6.53175e-11	10.185	1078.34	854.42	1111.2	4505.45	3299.86
FBgn0039471	CG6295	protein_coding		51607.2	-1.79423	1.07539e-16	15.9684	21803.8	21552.5	33097.5	96763.6	91416.7
FBgn0037176	CG14456	protein_coding		50.8968	-1.78202	6.88925e-05	4.16183	14.634	5.76014	8.98766	46.0299	53.0223
FBgn0261611	CG42700	protein_coding		291.12	-1.76842	3.99843e-12	11.3981	161.889	104.643	105.401	471.259	446.011
FBgn0035779	CG8562	protein_coding		8675.02	-1.7663	6.12476e-25	24.2129	3163.69	4706.99	4944.03	15366.3	14807.8
FBgn0003357	Jon99Ciii	protein_coding	Jonah 99Ciii [Source:FlyBase gene name;Acc:FBgn0003357]	41249.2	-1.76009	9.42104e-12	11.0259	14990.7	17808.4	18154.3	66299.5	58630.2
FBgn0032067	CG9465	protein_coding		331.201	-1.75749	1.59618e-07	6.79692	73.1701	201.605	88.2425	498.657	455.368
FBgn0026439	Eaat1	protein_coding	Excitatory amino acid transporter 1 [Source:FlyBase gene name;Acc:FBgn0026439]	814.792	-1.75556	1.69297e-16	15.7714	333.839	428.17	332.543	1380.9	1223.67
FBgn0033821	CG10799	protein_coding		385.988	-1.75344	1.56458e-18	17.8056	152.743	107.523	120.925	417.557	481.359
FBgn0037845	CG14694	protein_coding		373.214	-1.75128	2.43626e-10	9.61328	273.473	172.804	147.071	745.246	729.836
FBgn0023197	Jon74E	protein_coding	Jonah 74E [Source:FlyBase gene name;Acc:FBgn0023197]	38324.9	-1.74477	6.69583e-28	27.1742	29218.6	26762.6	25977.6	98813.1	90985.2
FBgn0035358	CG14949	protein_coding		1550.71	-1.73324	1.95319e-44	43.7093	661.275	778.579	629.136	2393.56	2274.76
FBgn0260388	CG42514	protein_coding		463.516	-1.71803	3.0098e-21	20.5215	327.436	285.127	254.106	957.86	1025.1
FBgn0039678	Obp99a	protein_coding	Odorant-binding protein 99a [Source:FlyBase gene name;Acc:FBgn0039678]	85.0218	-1.71558	2.93081e-05	4.53301	56.7068	22.0805	26.963	146.857	151.789
FBgn0033234	CG8791	protein_coding		1517.49	-1.70872	2.21537e-12	11.6546	1507.3	902.422	960.862	3489.51	4493.38
FBgn0010357	betaTry	protein_coding	betaTrypsin [Source:FlyBase gene name;Acc:FBgn0010357]	102955	-1.70548	9.40708e-23	22.0265	62008.9	60939.4	58301.3	213042	196422
FBgn0013278	Hsp70Bb	protein_coding	Heat-shock-protein-70Bb [Source:FlyBase gene name;Acc:FBgn0013278]	275.681	-1.69942	7.17056e-12	11.1444	145.426	225.605	251.654	703.6	775.581
FBgn0030509	CG11162	protein_coding		234.226	-1.69263	9.14255e-22	21.0389	120.731	128.643	116.023	442.764	377.394
FBgn0039092	CG16723	protein_coding		142.95	-1.69231	1.56788e-08	7.80469	87.8041	72.0017	58.0113	249.877	276.548
FBgn0034943	Fmo-1	protein_coding	Flavin-containing monooxygenase 1 [Source:FlyBase gene name;Acc:FBgn0034943]	130.044	-1.69007	4.2684e-08	7.36973	105.182	65.2816	68.633	350.704	232.882
FBgn0267161	CR45601	lincRNA		13.2488	-1.68909	0.0010754	2.96843	3.6585	3.84009	3.26824	23.015	19.7534
FBgn0041194	Prat2	protein_coding	Phosphoribosylamidotransferase 2 [Source:FlyBase gene name;Acc:FBgn0041194]	81.4404	-1.68306	8.14488e-06	5.08912	44.8167	23.0406	32.6824	133.706	128.917
FBgn0040827	CG13315	protein_coding		17183.4	-1.68197	3.48687e-12	11.4576	13045.3	7378.74	8204.92	31358.4	34545.6
FBgn0029580	CG14778	protein_coding		21.0777	-1.68052	0.000334363	3.47578	6.40238	10.5603	10.6218	50.4137	35.3482
FBgn0004045	Yp1	protein_coding	Yolk protein 1 [Source:FlyBase gene name;Acc:FBgn0004045]	9692.48	-1.66197	4.22685e-15	14.374	4949.04	3780.57	3796.06	16002	11804.2
FBgn0034507	CG11192	protein_coding		57.225	-1.63717	1.05953e-05	4.97489	30.1827	17.2804	16.3412	81.1003	77.9739
FBgn0266635	CR45142	lincRNA		331.788	-1.63667	5.79094e-11	10.2373	227.742	169.924	157.693	610.444	630.03
FBgn0036242	CG6793	protein_coding		22.844	-1.62945	5.15462e-05	4.2878	11.8901	15.3604	13.073	50.4137	53.0223
FBgn0033904	CG18327	protein_coding		527.474	-1.6278	1.3287e-21	20.8766	289.936	357.129	349.702	1123.35	1004.3
FBgn0044028	Notum	protein_coding	Notum [Source:FlyBase gene name;Acc:FBgn0044028]	21.0442	-1.6247	0.000102357	3.98988	12.8048	10.5603	13.073	44.934	50.943
FBgn0028400	Syt4	protein_coding	Synaptotagmin 4 [Source:FlyBase gene name;Acc:FBgn0028400]	233.388	-1.62092	4.67929e-12	11.3298	236.888	213.125	253.289	768.261	807.81
FBgn0023129	aay	protein_coding	astray [Source:FlyBase gene name;Acc:FBgn0023129]	1149.98	-1.62079	4.40224e-13	12.3563	436.277	799.699	675.709	2126.14	2031.48
FBgn0050272	CG30272	protein_coding		1144.48	-1.61869	1.81831e-10	9.74033	497.557	787.219	858.73	2292.73	2466.06
FBgn0030817	CG4991	protein_coding		773.461	-1.61498	1.0571e-14	13.9759	378.655	555.853	550.698	1642.83	1558.44
FBgn0264562	Hr4	protein_coding	Hr4 [Source:FlyBase gene name;Acc:FBgn0264562]	19.8224	-1.6142	0.000144805	3.83922	12.8048	11.5203	13.89	43.838	56.1412
FBgn0035798	frac	protein_coding	faulty attraction [Source:FlyBase gene name;Acc:FBgn0035798]	14.3057	-1.60953	0.00143304	2.84374	9.14626	12.4803	7.35354	33.9745	55.1016
FBgn0030597	Eo	protein_coding	Ecdysone oxidase [Source:FlyBase gene name;Acc:FBgn0030597]	35.4774	-1.6001	0.000204615	3.68906	21.0364	7.68018	12.2559	51.5097	57.1809
FBgn0267001	Ten-a	protein_coding	Tenascin accessory [Source:FlyBase gene name;Acc:FBgn0267001]	57.7982	-1.60008	1.36921e-07	6.86353	43.9021	52.8013	40.853	176.448	135.155
FBgn0015572	alpha-Est4	protein_coding	alpha-Esterase-4 [Source:FlyBase gene name;Acc:FBgn0015572]	273.751	-1.59819	3.27148e-13	12.4853	119.816	148.804	175.668	484.41	464.725
FBgn0035264	Oseg4	protein_coding	Outer segment 4 [Source:FlyBase gene name;Acc:FBgn0035264]	451.529	-1.59808	1.86062e-12	11.7303	151.828	225.605	270.447	670.721	723.598
FBgn0031170	CG1718	protein_coding		5867.3	-1.59079	4.78889e-25	24.3198	3731.67	4076.26	3683.31	12476.3	11286.5
FBgn0032144	CG17633	protein_coding		45957	-1.58623	1.55097e-21	20.8094	23937.6	33877.3	34713.6	97926.4	93709.1
FBgn0030195	CG2898	protein_coding		35.5002	-1.58545	1.54561e-05	4.8109	23.7803	19.2005	14.7071	66.853	69.6567
FBgn0003390	shf	protein_coding	shifted [Source:FlyBase gene name;Acc:FBgn0003390]	216.069	-1.56681	1.37661e-16	15.8612	160.06	138.243	122.559	404.406	460.566
FBgn0035968	Slc45-1	protein_coding	Slc45 ortholog 1 [Source:FlyBase gene name;Acc:FBgn0035968]	362.436	-1.5596	5.63136e-09	8.24939	228.657	212.165	144.62	661.954	588.443
FBgn0031653	Jon25Biii	protein_coding	Jonah 25Biii [Source:FlyBase gene name;Acc:FBgn0031653]	57057.2	-1.55615	1.46983e-17	16.8327	27297	30271.4	28478.6	88838.8	86493.9
FBgn0260817	gkt	protein_coding	glaikit [Source:FlyBase gene name;Acc:FBgn0260817]	107.102	-1.55394	5.77165e-10	9.2387	62.1946	81.602	89.8766	283.851	210.01
FBgn0032713	CG17323	protein_coding		74.5563	-1.54405	6.17523e-06	5.20935	58.5361	37.4409	25.3289	121.65	148.67
FBgn0026565	CG1315	protein_coding		2207.27	-1.54086	4.35326e-20	19.3612	1217.37	1175.07	1407.79	3925.69	3680.37
FBgn0263830	CG40486	protein_coding		198.796	-1.53283	2.15138e-09	8.66728	119.816	61.4415	74.3525	258.644	270.31
FBgn0259167	CG42272	protein_coding		31.3812	-1.52863	0.000208601	3.68068	14.634	28.8007	26.1459	89.8679	76.9343
FBgn0040069	vanin-like	protein_coding	vanin-like [Source:FlyBase gene name;Acc:FBgn0040069]	4124.72	-1.52425	0.000502034	3.29927	822.249	2522.94	2225.67	7171.9	6619.47
FBgn0043783	CG32444	protein_coding		1679.69	-1.52367	1.06696e-08	7.97185	1187.18	1093.47	1067.9	3493.89	3478.68
FBgn0031930	CG7025	protein_coding		1538.96	-1.51484	9.52439e-26	25.0212	892.675	1144.35	996.813	2959.07	2956.77
FBgn0039342	CG5107	protein_coding		22807.3	-1.51168	1.60786e-16	15.7938	21871.5	15907.6	15472.7	52073	53460
FBgn0033292	Cyp4ad1	protein_coding	Cyp4ad1 [Source:FlyBase gene name;Acc:FBgn0033292]	1331.38	-1.51061	1.32497e-28	27.8778	771.944	822.74	835.035	2362.87	2348.58
FBgn0040096	lectin-33A	protein_coding	lectin-33A [Source:FlyBase gene name;Acc:FBgn0040096]	21.3448	-1.49544	0.00107242	2.96963	20.1218	9.60023	11.4388	53.7016	48.8637
FBgn0031547	Sr-CIV	protein_coding	Scavenger receptor class C, type IV [Source:FlyBase gene name;Acc:FBgn0031547]	150.307	-1.49459	4.95035e-11	10.3054	73.1701	77.7619	52.2918	203.847	197.534
FBgn0015034	Cyp4e1	protein_coding	Cytochrome P450-4e1 [Source:FlyBase gene name;Acc:FBgn0015034]	85.1678	-1.48128	1.13696e-07	6.94425	53.9629	64.3215	53.926	200.559	148.67
FBgn0035359	CG1143	protein_coding		1677.95	-1.47168	6.92979e-35	34.1593	974.991	1081.95	901.217	2732.2	2817.46
FBgn0085249	CG34220	protein_coding		150602	-1.46703	1.1297e-10	9.94704	110945	100698	97228.5	328683	274269
FBgn0031936	CG13794	protein_coding		28.88	-1.45937	0.00136516	2.86482	17.3779	14.4003	6.53648	60.2773	32.2292
FBgn0040350	CG3690	protein_coding		2059.32	-1.44449	1.50751e-08	7.82174	967.674	1005.14	895.498	2954.68	2592.89
FBgn0039114	Lsd-1	protein_coding	Lipid storage droplet-1 [Source:FlyBase gene name;Acc:FBgn0039114]	1268.78	-1.44373	6.18581e-14	13.2086	525.91	552.973	561.32	1642.83	1434.72
FBgn0039487	gb	protein_coding	genderblind [Source:FlyBase gene name;Acc:FBgn0039487]	242.45	-1.44242	2.49063e-07	6.60369	176.523	169.924	163.412	450.435	556.214
FBgn0033079	Fmo-2	protein_coding	Flavin-containing monooxygenase 2 [Source:FlyBase gene name;Acc:FBgn0033079]	2967.23	-1.43176	5.15816e-20	19.2875	2003.95	2110.13	1955.22	5832.65	5372.92
FBgn0042101	CG18744	protein_coding		397.435	-1.4161	6.53071e-11	10.185	243.291	190.085	188.741	564.414	593.642
FBgn0085358	Diedel3	protein_coding	Diedel 3 [Source:FlyBase gene name;Acc:FBgn0085358]	9310.78	-1.41484	1.89602e-25	24.7222	9074.92	8258.12	7499.79	22560.1	22587.5
FBgn0030816	CG16700	protein_coding		497.687	-1.41396	7.46499e-07	6.12697	216.766	437.77	454.285	1075.13	1085.4
FBgn0005670	Cyp4d1	protein_coding	Cytochrome P450-4d1 [Source:FlyBase gene name;Acc:FBgn0005670]	879.95	-1.40917	1.42288e-21	20.8468	383.228	363.849	326.824	972.108	968.956
FBgn0038717	CG17751	protein_coding		1083.96	-1.40708	4.26539e-07	6.37004	729.872	758.418	672.44	2262.04	1884.89
FBgn0030005	CG2120	protein_coding		288.667	-1.40648	4.32583e-10	9.36393	156.401	216.005	254.106	599.485	570.769
FBgn0040718	CG15353	protein_coding		67.5179	-1.40534	0.000299125	3.52415	11.8901	10.5603	6.53648	28.4947	33.2689
FBgn0051792	CG31792	protein_coding		136.667	-1.40477	4.18705e-10	9.37809	84.1456	96.9623	84.1572	277.275	215.208
FBgn0259171	Pde9	protein_coding	Phosphodiesterase 9 [Source:FlyBase gene name;Acc:FBgn0259171]	237.063	-1.39953	8.32157e-11	10.0798	160.974	134.403	101.315	357.28	371.156
FBgn0032940	Mio	protein_coding	Mlx interactor [Source:FlyBase gene name;Acc:FBgn0032940]	2366.29	-1.38986	4.58348e-29	28.3388	1488.1	1674.28	1671.7	4432.02	4150.29
FBgn0001255	ImpE3	protein_coding	Ecdysone-inducible gene E3 [Source:FlyBase gene name;Acc:FBgn0001255]	19.1095	-1.38621	0.00127641	2.89401	14.634	13.4403	13.073	47.1259	41.5861
FBgn0030593	CG9512	protein_coding		2542.42	-1.38446	1.74341e-07	6.7586	1540.23	1604.2	1010.7	4014.47	3753.15
FBgn0050371	CG30371	protein_coding		405.055	-1.38376	3.64658e-06	5.43811	219.51	385.929	308.032	725.519	1030.3
FBgn0000055	Adh	protein_coding	Alcohol dehydrogenase [Source:FlyBase gene name;Acc:FBgn0000055]	42.5054	-1.38048	0.00054633	3.26255	7.31701	22.0805	13.89	47.1259	42.6258
FBgn0031703	CG12512	protein_coding		794.892	-1.37842	3.92759e-09	8.40587	567.068	399.37	368.494	1289.93	1146.74
FBgn0011706	rpr	protein_coding	reaper [Source:FlyBase gene name;Acc:FBgn0011706]	39.6603	-1.37206	0.000116456	3.93384	24.6949	25.9206	37.5848	86.5801	88.3705
FBgn0010435	emp	protein_coding	epithelial membrane protein [Source:FlyBase gene name;Acc:FBgn0010435]	835.98	-1.36515	5.67841e-17	16.2458	594.507	490.572	404.445	1355.69	1265.26
FBgn0035538	DopEcR	protein_coding	Dopamine/Ecdysteroid receptor [Source:FlyBase gene name;Acc:FBgn0035538]	83.562	-1.35636	1.66582e-06	5.77837	68.597	53.7613	54.743	165.488	162.186
FBgn0039872	salt	protein_coding	salty dog [Source:FlyBase gene name;Acc:FBgn0039872]	5237.72	-1.35506	0.000455578	3.34144	2859.12	2092.85	1927.44	7391.09	6255.59
FBgn0032283	CG7296	protein_coding		70.6081	-1.355	7.44638e-05	4.12806	44.8167	29.7607	20.4265	87.676	93.5687
FBgn0014417	CG13397	protein_coding		57.2175	-1.35485	0.000227249	3.6435	42.9874	15.3604	24.5118	86.5801	75.8946
FBgn0013307	Odc1	protein_coding	Ornithine decarboxylase 1 [Source:FlyBase gene name;Acc:FBgn0013307]	67.8792	-1.35469	2.8484e-05	4.5454	31.0973	26.8806	35.9506	113.979	64.4585
FBgn0051454	CG31454	protein_coding		213.875	-1.35305	5.66151e-14	13.2471	153.657	125.763	158.51	370.431	400.266
FBgn0036203	Muc68D	protein_coding	Mucin 68D [Source:FlyBase gene name;Acc:FBgn0036203]	30633	-1.34951	3.02275e-13	12.5196	21440.7	19877.3	19437.9	60584.1	46147.1
FBgn0039800	Npc2g	protein_coding	Niemann-Pick type C-2g [Source:FlyBase gene name;Acc:FBgn0039800]	124.222	-1.34695	6.71419e-05	4.17301	58.5361	37.4409	49.8407	152.337	123.719
FBgn0040253	Ugt86Dg	protein_coding	Ugt86Dg [Source:FlyBase gene name;Acc:FBgn0040253]	92.8186	-1.34537	2.35764e-07	6.62752	39.3289	40.321	49.8407	115.075	119.56
FBgn0001285	Jon44E	protein_coding	Jonah 44E [Source:FlyBase gene name;Acc:FBgn0001285]	2437.89	-1.33959	2.03111e-07	6.69227	1881.39	1329.63	1208.43	3776.64	4166.93
FBgn0267164	CR45604	lincRNA		775.041	-1.33888	3.18146e-07	6.49737	371.338	573.134	537.625	1419.26	1252.78
FBgn0030999	Mur18B	protein_coding	Mucin related 18B [Source:FlyBase gene name;Acc:FBgn0030999]	36534.9	-1.33743	3.94923e-18	17.4035	22896.7	24889.6	19839.8	59671.2	56933.5
FBgn0032069	CG9468	protein_coding		35446.3	-1.33696	1.98417e-07	6.70242	12667.6	22694	13453.7	45127.9	41956.2
FBgn0050047	CG30047	protein_coding		1036.6	-1.33513	1.80898e-22	21.7426	732.615	792.979	760.683	1875.17	2043.96
FBgn0031694	Cyp4ac2	protein_coding	Cyp4ac2 [Source:FlyBase gene name;Acc:FBgn0031694]	38.1753	-1.33173	0.00103999	2.98297	42.9874	22.0805	23.6947	92.0598	86.2912
FBgn0038983	CG5326	protein_coding		62.3583	-1.32976	0.000365618	3.43697	18.2925	49.9212	46.5724	116.171	106.045
FBgn0035780	CG18417	protein_coding		314.287	-1.32693	4.9767e-09	8.30306	249.693	327.368	345.616	807.715	836.92
FBgn0036732	Oatp74D	protein_coding	Organic anion transporting polypeptide 74D [Source:FlyBase gene name;Acc:FBgn0036732]	171.226	-1.32332	1.979e-05	4.70355	193.901	115.203	89.0595	367.143	365.958
FBgn0028886	CG15279	protein_coding		1408.29	-1.32097	1.00242e-12	11.999	794.81	968.663	806.438	2384.79	2031.48
FBgn0031835	CG11319	protein_coding		121.499	-1.32041	3.55958e-07	6.4486	75.914	99.8424	122.559	271.796	260.953
FBgn0029843	Nep1	protein_coding	Neprilysin 1 [Source:FlyBase gene name;Acc:FBgn0029843]	692.545	-1.32028	4.08562e-10	9.38874	679.567	489.612	508.211	1422.54	1503.34
FBgn0033875	CG6357	protein_coding		1274.78	-1.31109	7.0472e-16	15.152	744.506	578.894	522.918	1422.54	1697.75
FBgn0034140	CG8317	protein_coding		64.6819	-1.30927	0.000397259	3.40093	34.7558	25.9206	26.1459	92.0598	71.736
FBgn0027580	CG1516	protein_coding		4973.68	-1.30611	1.6265e-14	13.7887	3343.87	3790.17	3615.49	9378.05	8844.33
FBgn0004622	TkR99D	protein_coding	Tachykinin-like receptor at 99D [Source:FlyBase gene name;Acc:FBgn0004622]	102.28	-1.29743	1.98209e-07	6.70288	84.1456	96.0023	80.8889	248.781	205.851
FBgn0024179	wit	protein_coding	wishful thinking [Source:FlyBase gene name;Acc:FBgn0024179]	1097.1	-1.2941	7.46045e-25	24.1272	1030.78	912.982	903.668	2427.53	2304.91
FBgn0026314	Ugt35b	protein_coding	UDP-glycosyltransferase 35b [Source:FlyBase gene name;Acc:FBgn0026314]	1111.49	-1.28889	7.34646e-08	7.13392	695.116	925.462	794.182	2365.06	1796.52
FBgn0032820	fbp	protein_coding	fructose-1,6-bisphosphatase [Source:FlyBase gene name;Acc:FBgn0032820]	557.389	-1.2882	1.87821e-08	7.72626	358.533	221.765	219.789	706.888	653.942
FBgn0031417	CG3597	protein_coding		121.915	-1.28774	0.000354518	3.45036	53.9629	24.0006	19.6094	100.827	76.9343
FBgn0053080	CG33080	protein_coding		1980.52	-1.2858	3.30121e-16	15.4813	1585.05	1249.95	1181.47	3494.98	3184.46
FBgn0035697	CG10163	protein_coding		137.516	-1.27713	0.000482081	3.31688	188.413	120.963	102.95	405.502	368.037
FBgn0038479	CG17477	protein_coding		143.959	-1.27567	2.03501e-05	4.69143	65.8531	115.203	126.644	260.836	281.746
FBgn0034883	CG17664	protein_coding		1334.82	-1.27523	2.42575e-11	10.6152	1016.15	664.336	744.342	2059.29	1981.58
FBgn0051116	ClC-a	protein_coding	Chloride channel-a [Source:FlyBase gene name;Acc:FBgn0051116]	1529.69	-1.26763	8.88507e-14	13.0513	1120.42	905.302	857.096	2392.46	2352.73
FBgn0038481	CG17475	protein_coding		2468.94	-1.26531	7.14875e-23	22.1458	1980.17	1862.44	2216.68	4826.56	5049.59
FBgn0037714	CG9396	protein_coding		650.756	-1.26158	7.05439e-10	9.15154	428.045	379.209	310.483	1026.91	823.405
FBgn0264997	CR44148	lincRNA		39.7576	-1.25256	0.000581985	3.23509	26.5242	25.9206	26.963	72.3327	70.6964
FBgn0035409	CG14963	protein_coding		1684.61	-1.24959	2.5614e-09	8.59152	608.226	720.977	753.329	2098.74	1309.96
FBgn0032810	CG13077	protein_coding		238.368	-1.24667	3.46049e-08	7.46086	185.669	151.684	165.863	398.926	434.575
FBgn0030332	CG9360	protein_coding		206.863	-1.24463	2.13593e-07	6.67041	218.596	164.164	142.985	442.764	438.733
FBgn0034381	List	protein_coding	Lithium-inducible SLC6 transporter [Source:FlyBase gene name;Acc:FBgn0034381]	414.848	-1.24421	1.672e-06	5.77676	266.156	159.364	147.071	564.414	388.83
FBgn0004652	fru	protein_coding	fruitless [Source:FlyBase gene name;Acc:FBgn0004652]	111.801	-1.2421	1.94899e-06	5.71019	65.8531	64.3215	66.1819	156.721	171.543
FBgn0039760	CG9682	protein_coding		2632.96	-1.24199	1.84062e-36	35.735	2243.58	2417.34	2577.01	5891.83	5639.08
FBgn0030594	CG9509	protein_coding		5362.03	-1.23427	1.16569e-06	5.93342	3777.41	2657.34	2033.66	7543.42	6443.77
FBgn0039430	CG5455	protein_coding		1523.9	-1.23287	8.00823e-11	10.0965	952.126	1241.31	1133.26	2784.81	2600.17
FBgn0033446	CG1648	protein_coding		1227.05	-1.23094	1.64244e-06	5.78451	840.541	436.81	515.565	1651.6	1304.76
FBgn0038115	CG7966	protein_coding		473.003	-1.22546	1.08152e-10	9.96596	327.436	317.768	251.654	735.383	704.884
FBgn0037623	CG9801	protein_coding		576.391	-1.22515	4.32362e-07	6.36415	598.165	518.412	381.567	1395.14	1077.08
FBgn0038354	CG5404	protein_coding		399.906	-1.22487	4.96918e-05	4.30372	536.885	268.806	224.691	875.664	878.506
FBgn0031010	CG8028	protein_coding		535.637	-1.22219	0.000175978	3.75454	412.496	240.966	172.4	784.7	618.593
FBgn0033774	CG12374	protein_coding		512825	-1.2215	1.09597e-10	9.9602	317174	419304	405276	969445	864465
FBgn0040319	Gclc	protein_coding	Glutamate-cysteine ligase catalytic subunit [Source:FlyBase gene name;Acc:FBgn0040319]	5125.44	-1.21508	1.47707e-22	21.8306	3828.62	3538.64	3250.26	8795	7859.77
FBgn0036831	CG6839	protein_coding		3839.62	-1.20508	2.10812e-05	4.67611	1876.81	2164.85	2090.86	5644.14	4419.56
FBgn0038718	CG17752	protein_coding		4330.17	-1.20104	4.40015e-09	8.35653	3681.37	3605.85	3480.68	9497.5	7653.92
FBgn0035131	mthl9	protein_coding	methuselah-like 9 [Source:FlyBase gene name;Acc:FBgn0035131]	119.767	-1.20041	2.54462e-06	5.59438	89.6334	92.1622	72.7183	198.367	213.129
FBgn0263256	CG43394	protein_coding		413.569	-1.19937	3.75476e-18	17.4254	310.058	305.287	291.69	695.928	715.281
FBgn0003651	svp	protein_coding	seven up [Source:FlyBase gene name;Acc:FBgn0003651]	45.3904	-1.19542	0.00126408	2.89822	31.0973	24.0006	22.0606	49.3178	83.1722
FBgn0033710	CG17739	protein_coding		109.384	-1.18811	0.000309019	3.51002	98.7796	66.2416	49.8407	187.407	170.503
FBgn0033274	CG14757	protein_coding		96.9549	-1.18177	1.75588e-05	4.7555	45.7313	48.9612	70.2672	145.761	120.6
FBgn0036191	Sug	protein_coding	Sug [Source:FlyBase gene name;Acc:FBgn0036191]	1073.03	-1.17981	6.00797e-13	12.2213	862.492	801.619	778.658	1945.31	1830.83
FBgn0031998	SLC5A11	protein_coding	Sodium/solute co-transporter-like 5A11 [Source:FlyBase gene name;Acc:FBgn0031998]	1392	-1.1797	1.37145e-06	5.86282	1591.45	934.102	892.229	2883.44	2564.82
FBgn0050043	CG30043	protein_coding		815.367	-1.17858	7.59049e-11	10.1197	486.581	414.73	398.725	971.012	1038.61
FBgn0263002	CR43310	pseudogene		110.174	-1.17548	0.000917351	3.03746	34.7558	25.9206	23.6947	71.2368	68.6171
FBgn0005391	Yp2	protein_coding	Yolk protein 2 [Source:FlyBase gene name;Acc:FBgn0005391]	6773.24	-1.17312	2.8929e-06	5.53867	3394.18	2845.51	2725.71	8064	6048.7
FBgn0027073	CG4302	protein_coding		1937.83	-1.1712	9.56675e-10	9.01924	1026.21	835.22	633.221	1903.67	1933.75
FBgn0002567	ltd	protein_coding	lightoid [Source:FlyBase gene name;Acc:FBgn0002567]	1873.69	-1.16671	5.6211e-20	19.2502	1486.27	1573.48	1440.48	3435.8	3396.55
FBgn0034501	CG13868	protein_coding		9692.55	-1.16659	3.9954e-06	5.39844	10542	6363.99	5262.68	18132.5	16940.1
FBgn0030837	CG8661	protein_coding		7966.39	-1.16551	4.54561e-18	17.3424	7487.13	5726.54	7047.14	14876.4	15934.8
FBgn0031141	CG1304	protein_coding		1148.02	-1.16343	9.23084e-14	13.0348	1079.26	1023.38	984.557	2411.09	2339.22
FBgn0039761	CG18404	protein_coding		8049.84	-1.16321	1.15514e-14	13.9374	6653.9	6398.55	7242.42	15909.9	15020.9
FBgn0017448	CG2187	protein_coding		1205.96	-1.16315	1.2583e-05	4.90022	760.054	676.816	667.538	1752.42	1566.76
FBgn0053012	CG33012	protein_coding		86.7408	-1.15859	0.000437126	3.35939	62.1946	72.0017	75.9866	202.751	142.432
FBgn0050049	CG30049	protein_coding		269.003	-1.15847	4.09687e-05	4.38755	246.034	157.444	146.254	433.996	438.733
FBgn0037819	CG14688	protein_coding		436.945	-1.15779	3.88711e-13	12.4104	267.071	258.246	263.91	594.005	602.999
FBgn0032136	Apoltp	protein_coding	Apolipoprotein lipid transfer particle [Source:FlyBase gene name;Acc:FBgn0032136]	366.679	-1.14932	8.70823e-06	5.06007	227.742	173.764	184.656	542.495	368.037
FBgn0040342	CG3706	protein_coding		1598.18	-1.14906	4.31051e-22	21.3655	1132.31	954.263	1007.43	2422.05	2205.1
FBgn0035978	UGP	protein_coding	UGP [Source:FlyBase gene name;Acc:FBgn0035978]	1518.37	-1.14753	7.68736e-07	6.11422	1249.38	1154.91	1049.1	2940.43	2394.32
FBgn0032049	Bace	protein_coding	beta-site APP-cleaving enzyme [Source:FlyBase gene name;Acc:FBgn0032049]	152504	-1.14727	2.11426e-10	9.67484	101465	127132	120902	277483	253189
FBgn0036381	CG8745	protein_coding		5124.85	-1.14694	1.11667e-08	7.95207	3539.6	3432.08	2727.35	7585.07	7175.68
FBgn0027348	bgm	protein_coding	bubblegum [Source:FlyBase gene name;Acc:FBgn0027348]	2141.97	-1.14242	2.33855e-07	6.63105	1088.4	1555.24	1665.17	3333.88	3260.35
FBgn0042126	CG18788	protein_coding		69.9998	-1.1404	0.000118209	3.92735	40.2435	44.1611	35.9506	94.2517	94.6084
FBgn0035484	CG11594	protein_coding		802.664	-1.13551	7.66365e-09	8.11556	405.179	410.89	390.555	981.971	832.762
FBgn0036043	CG8177	protein_coding		3868.85	-1.13506	2.80933e-22	21.5514	3434.42	2803.27	2963.48	6941.75	6689.13
FBgn0036262	CG6910	protein_coding		255.636	-1.12849	0.000493072	3.30709	175.608	72.0017	102.95	314.538	236.001
FBgn0034390	CG15093	protein_coding		2634.39	-1.12694	3.45494e-08	7.46156	2108.21	1945.01	1613.69	4430.93	4098.31
FBgn0034885	CG4019	protein_coding		1251.88	-1.12414	3.41765e-12	11.4663	804.871	832.34	912.656	1971.61	1810.04
FBgn0002868	MtnA	protein_coding	Metallothionein A [Source:FlyBase gene name;Acc:FBgn0002868]	27270.3	-1.1231	2.97615e-14	13.5263	22975.4	16578.6	19397.8	44025.4	43074.9
FBgn0032449	CG17036	protein_coding		271.731	-1.1153	2.92181e-08	7.53435	169.206	140.163	133.998	333.169	325.411
FBgn0016075	vkg	protein_coding	viking [Source:FlyBase gene name;Acc:FBgn0016075]	255.477	-1.11355	5.21977e-06	5.28235	116.158	96.0023	113.571	229.054	259.913
FBgn0039203	CG13618	protein_coding		100.282	-1.11122	0.000490193	3.30963	71.3408	73.9218	71.0842	134.802	202.732
FBgn0037146	CG7470	protein_coding		10758.4	-1.11078	4.84676e-11	10.3145	8399.93	5879.18	6138.57	15501.1	14517.7
FBgn0035673	CG6602	protein_coding		1658.73	-1.10612	5.32916e-10	9.27334	1318.89	1228.83	1224.77	2940.43	2611.61
FBgn0032669	CG15155	protein_coding		2464.76	-1.10279	6.08737e-08	7.21557	1623.46	1978.61	1410.25	3718.56	3684.53
FBgn0039307	CR13656	pseudogene		467.675	-1.10114	0.000273984	3.56227	321.948	167.044	152.79	543.591	432.496
FBgn0052843	Dh31-R	protein_coding	Diuretic hormone 31 Receptor [Source:FlyBase gene name;Acc:FBgn0052843]	1168.32	-1.09991	3.94914e-11	10.4035	745.42	816.02	749.244	1642.83	1727.9
FBgn0037835	CG14687	protein_coding		92.5412	-1.09789	0.00123735	2.90751	64.9384	54.7213	66.9989	106.307	185.058
FBgn0039856	CG1774	protein_coding		900.225	-1.09728	3.04422e-11	10.5165	471.947	513.612	453.468	1041.15	1051.09
FBgn0031522	CG3285	protein_coding		1086.76	-1.09509	6.16255e-09	8.21024	933.833	972.503	908.571	2249.99	1880.73
FBgn0053281	CG33281	protein_coding		342.612	-1.09352	3.16054e-05	4.50024	219.51	290.887	289.239	654.282	547.897
FBgn0003429	slo	protein_coding	slowpoke [Source:FlyBase gene name;Acc:FBgn0003429]	513.729	-1.08969	2.54427e-12	11.5944	365.85	313.928	303.129	691.545	726.717
FBgn0027552	CG10863	protein_coding		1806.07	-1.08873	2.10522e-24	23.6767	1264.93	1323.87	1292.59	2846.18	2706.22
FBgn0033250	CG14762	protein_coding		54.0941	-1.08605	0.000808983	3.09206	32.0119	28.8007	32.6824	80.0044	63.4188
FBgn0262028	CR42839	lincRNA		368.944	-1.08598	3.74866e-08	7.42612	294.51	272.647	236.947	618.116	553.095
FBgn0031118	RhoGAP19D	protein_coding	Rho GTPase activating protein at 19D [Source:FlyBase gene name;Acc:FBgn0031118]	1399.49	-1.08334	7.05753e-09	8.15135	1450.6	1007.06	951.875	2516.3	2435.91
FBgn0061356	CG18003	protein_coding		787.673	-1.08258	9.56675e-10	9.01924	542.373	585.614	534.357	1328.29	1075
FBgn0035934	TrpA1	protein_coding	Transient receptor potential cation channel A1 ortholog [Source:FlyBase gene name;Acc:FBgn0035934]	290.204	-1.0816	2.28546e-06	5.64103	198.474	181.444	132.364	369.335	379.473
FBgn0066101	LpR1	protein_coding	Lipophorin receptor 1 [Source:FlyBase gene name;Acc:FBgn0066101]	2542.89	-1.07632	1.62329e-09	8.7896	1981.99	1765.48	1478.88	3861.03	3659.58
FBgn0039321	CG10550	protein_coding		905.751	-1.07614	5.25916e-16	15.2791	780.176	754.578	844.84	1753.52	1645.77
FBgn0040060	yip7	protein_coding	yippee interacting protein 7 [Source:FlyBase gene name;Acc:FBgn0040060]	192887	-1.07394	6.20769e-07	6.20707	111176	161953	190831	340351	335119
FBgn0035791	CG8539	protein_coding		278.898	-1.07376	2.42627e-09	8.61506	175.608	140.163	138.9	318.921	332.689
FBgn0085485	CG34456	protein_coding		110.351	-1.07012	2.89463e-06	5.53841	64.9384	69.1217	71.0842	165.488	133.076
FBgn0017561	Ork1	protein_coding	Open rectifier K[+] channel 1 [Source:FlyBase gene name;Acc:FBgn0017561]	440.51	-1.06964	2.59266e-08	7.58625	383.228	304.327	285.971	739.766	660.179
FBgn0038257	smp-30	protein_coding	Senescence marker protein-30 [Source:FlyBase gene name;Acc:FBgn0038257]	2673.33	-1.06917	9.82104e-07	6.00784	1556.69	1523.56	1156.96	3022.63	3083.61
FBgn0032715	CG17597	protein_coding		2702.51	-1.0673	5.13637e-10	9.28934	1403.04	1856.68	1956.86	3850.07	3592
FBgn0025620	CG13360	protein_coding		678.275	-1.06626	1.00461e-08	7.998	564.324	435.85	440.395	1082.8	984.551
FBgn0032187	CG4839	protein_coding		2890.45	-1.06423	4.35469e-17	16.361	1739.62	1718.44	1678.24	3656.09	3580.56
FBgn0035091	CG3829	protein_coding		219.907	-1.06423	1.8626e-08	7.72988	143.596	144.963	139.717	323.305	289.023
FBgn0031533	CG2772	protein_coding		956.664	-1.061	7.23058e-07	6.14083	739.932	591.374	441.212	1300.89	1251.74
FBgn0033048	CG7881	protein_coding		1024.93	-1.05438	2.91235e-13	12.5358	859.748	829.46	839.121	1893.8	1664.48
FBgn0032666	CG5758	protein_coding		391.056	-1.05177	1.87538e-07	6.72691	460.057	300.487	346.433	882.24	701.766
FBgn0032943	Tsp39D	protein_coding	Tetraspanin 39D [Source:FlyBase gene name;Acc:FBgn0032943]	204.699	-1.04972	2.01084e-06	5.69662	95.1211	120.963	77.6207	218.094	198.574
FBgn0038846	CG5697	protein_coding		860.122	-1.04857	0.000441467	3.3551	698.774	661.456	546.613	1451.04	1360.91
FBgn0051826	CG31826	protein_coding		84.7304	-1.04809	0.000289117	3.53893	60.3653	39.3609	44.1212	96.4436	113.322
FBgn0030737	CG9914	protein_coding		3581.34	-1.04756	0.000201906	3.69485	2003.03	1340.19	1050.74	3291.14	3050.34
FBgn0035142	hipk	protein_coding	homeodomain interacting protein kinase [Source:FlyBase gene name;Acc:FBgn0035142]	1838.42	-1.04532	3.36124e-10	9.4735	1746.94	1423.71	1300.76	3320.73	2963.01
FBgn0001187	Hex-C	protein_coding	Hexokinase C [Source:FlyBase gene name;Acc:FBgn0001187]	1177.14	-1.03966	8.36706e-12	11.0774	803.956	779.539	781.109	1715.16	1578.19
FBgn0039941	CG17167	protein_coding		1518.02	-1.03905	3.18043e-07	6.49751	1210.05	897.622	840.755	2088.88	2063.71
FBgn0033638	CG9005	protein_coding		1629.42	-1.03821	0.000323295	3.4904	2035.04	969.623	982.923	2883.44	2939.1
FBgn0003162	Pu	protein_coding	Punch [Source:FlyBase gene name;Acc:FBgn0003162]	73.3022	-1.03424	0.00102511	2.98923	42.9874	48.0012	31.8653	74.5246	103.965
FBgn0000299	Cg25C	protein_coding	Collagen type IV [Source:FlyBase gene name;Acc:FBgn0000299]	401.299	-1.03291	8.81169e-06	5.05494	176.523	157.444	176.485	290.427	427.297
FBgn0001248	Idh	protein_coding	Isocitrate dehydrogenase [Source:FlyBase gene name;Acc:FBgn0001248]	9202.63	-1.0302	9.02956e-08	7.04433	5845.38	6409.11	5670.4	12869.7	12151.5
FBgn0051821	CG31821	protein_coding		412.452	-1.02927	2.42189e-08	7.61585	211.279	218.885	236.13	438.38	487.597
FBgn0000479	dnc	protein_coding	dunce [Source:FlyBase gene name;Acc:FBgn0000479]	997.276	-1.02876	1.51395e-11	10.8199	927.431	796.819	710.025	1563.92	1803.8
FBgn0035266	Gk	protein_coding	Glycerol kinase [Source:FlyBase gene name;Acc:FBgn0035266]	1075.02	-1.0284	1.84467e-05	4.73408	962.187	555.853	565.405	1489.4	1454.47
FBgn0034897	Sesn	protein_coding	Sestrin [Source:FlyBase gene name;Acc:FBgn0034897]	1545.96	-1.02567	2.22768e-10	9.65215	1208.22	1084.83	1061.36	2314.65	2321.54
FBgn0052521	CG32521	protein_coding		281.771	-1.02511	7.30126e-08	7.1366	198.474	201.605	160.961	385.774	392.989
FBgn0046776	CR14033	pseudogene		334.937	-1.02442	2.25618e-08	7.64663	291.766	277.447	270.447	621.404	548.937
FBgn0015380	drl	protein_coding	derailed [Source:FlyBase gene name;Acc:FBgn0015380]	214.514	-1.02176	2.8046e-06	5.55213	232.315	168.004	196.911	373.719	465.764
FBgn0030218	CG1628	protein_coding		151.977	-1.02167	1.02405e-05	4.98968	106.097	107.523	113.571	256.452	203.772
FBgn0011556	zetaTry	protein_coding	zetaTrypsin [Source:FlyBase gene name;Acc:FBgn0011556]	2788.79	-1.01452	6.30063e-19	18.2006	1896.02	1955.57	2087.59	4053.92	4026.57
FBgn0010548	Aldh-III	protein_coding	Aldehyde dehydrogenase type III [Source:FlyBase gene name;Acc:FBgn0010548]	1576.07	-1.01191	3.28823e-17	16.483	1176.21	1104.99	1063.81	2297.11	2244.61
FBgn0052512	CG32512	protein_coding		737.879	-1.00865	4.50703e-12	11.3461	439.021	505.932	488.602	928.27	1020.94
FBgn0030574	CG9413	protein_coding		870.829	-1.0083	4.18218e-05	4.3786	947.553	564.494	498.407	1387.47	1425.36
FBgn0250757	CG42235	protein_coding		8104.09	-1.00642	8.85458e-08	7.05283	4771.6	6006.86	5510.25	12485.1	9846.55
FBgn0052750	CG32750	protein_coding		839.447	-1.00535	3.96998e-07	6.40121	360.363	559.693	522.918	1017.04	961.679
FBgn0036835	CG14075	protein_coding		240.811	-1.0053	2.41309e-05	4.61743	185.669	246.726	256.557	398.926	566.611
FBgn0038938	CG7084	protein_coding		6453.16	-1.00101	1.40499e-05	4.85233	5249.95	6308.31	6254.59	13606.2	11161.7
FBgn0035186	CG13912	protein_coding		330.642	-0.999805	0.000232815	3.63299	229.571	262.086	319.47	570.99	571.809
FBgn0014395	tilB	protein_coding	touch insensitive larva B [Source:FlyBase gene name;Acc:FBgn0014395]	97.5944	-0.998179	6.98117e-05	4.15607	79.5725	58.5614	58.8283	134.802	138.274
FBgn0039109	CG10365	protein_coding		727.983	-0.997652	2.44849e-08	7.6111	584.446	584.654	508.211	1247.19	1035.49
FBgn0030608	Lsd-2	protein_coding	Lipid storage droplet-2 [Source:FlyBase gene name;Acc:FBgn0030608]	7413.68	-0.997312	3.29851e-10	9.48168	6116.1	5989.58	5985.78	12462	12068.3
FBgn0032945	CG8665	protein_coding		409.059	-0.99591	0.000179915	3.74493	304.57	194.885	167.497	482.218	442.892
FBgn0039827	CG1544	protein_coding		258.835	-0.994925	8.03632e-05	4.09494	137.194	146.884	83.3401	281.659	223.525
FBgn0038100	Paip2	protein_coding	polyA-binding protein interacting protein 2 [Source:FlyBase gene name;Acc:FBgn0038100]	754.839	-0.993963	0.000409286	3.38797	1010.66	557.773	527.004	1469.67	1485.66
FBgn0004893	bowl	protein_coding	brother of odd with entrails limited [Source:FlyBase gene name;Acc:FBgn0004893]	758.688	-0.993803	3.97752e-09	8.40039	710.664	612.495	533.54	1251.58	1263.18
FBgn0040336	Seipin	protein_coding	Seipin [Source:FlyBase gene name;Acc:FBgn0040336]	1327.37	-0.992966	6.16533e-09	8.21004	923.772	1011.86	938.802	1966.13	1925.44
FBgn0030503	Tango2	protein_coding	Transport and Golgi organization 2 [Source:FlyBase gene name;Acc:FBgn0030503]	608.996	-0.992764	2.70975e-06	5.56707	505.788	393.609	343.165	899.775	796.374
FBgn0031069	Pmp70	protein_coding		9245.75	-0.99172	4.47626e-12	11.3491	6829.51	7889.47	7440.15	15435.4	14386.7
FBgn0011555	thetaTry	protein_coding	thetaTrypsin [Source:FlyBase gene name;Acc:FBgn0011555]	10157.8	-0.990162	6.92316e-09	8.1597	6096.9	7584.18	8171.42	14957.5	14543.7
FBgn0032161	CG4594	protein_coding		172.791	-0.987966	1.38447e-06	5.85872	161.889	124.803	148.705	297.002	297.341
FBgn0014469	Cyp4e2	protein_coding	Cytochrome P450-4e2 [Source:FlyBase gene name;Acc:FBgn0014469]	1657.91	-0.987774	4.64175e-10	9.33332	1263.1	1216.35	996.813	2402.32	2267.48
FBgn0030367	Cyp311a1	protein_coding	Cyp311a1 [Source:FlyBase gene name;Acc:FBgn0030367]	328.78	-0.986057	0.00105304	2.97756	180.181	124.803	73.5354	283.851	240.16
FBgn0003308	ry	protein_coding	rosy [Source:FlyBase gene name;Acc:FBgn0003308]	852.922	-0.985427	4.03624e-06	5.39402	590.848	752.658	732.086	1516.79	1314.12
FBgn0086687	Desat1	protein_coding	Desaturase 1 [Source:FlyBase gene name;Acc:FBgn0086687]	10932.1	-0.982304	4.0073e-12	11.3971	7776.15	7108.97	7202.38	14607.9	14857.7
FBgn0036422	CG3868	protein_coding		19023.6	-0.981592	5.13363e-39	38.2896	14895.6	15012.8	15245.5	29410.9	30276.8
FBgn0036576	CG5151	protein_coding		565.863	-0.97732	6.1717e-10	9.20959	478.349	433.93	509.028	950.189	950.243
FBgn0051636	CG31636	protein_coding		236.352	-0.975823	0.000110293	3.95745	126.218	129.603	163.412	261.932	309.816
FBgn0266810	CR45272	lincRNA		181.723	-0.974377	0.000254139	3.59493	131.706	134.403	115.205	268.508	254.715
FBgn0050035	Tret1-1	protein_coding	Trehalose transporter 1-1 [Source:FlyBase gene name;Acc:FBgn0050035]	1862.73	-0.972034	1.07708e-06	5.96775	1281.39	1197.15	1013.97	2555.76	2121.93
FBgn0030745	CG4239	protein_coding		271.777	-0.97111	4.13588e-06	5.38343	216.766	192.965	220.606	439.476	409.623
FBgn0030653	CG7860	protein_coding		175.205	-0.966351	7.39474e-05	4.13108	125.304	122.883	114.388	271.796	218.327
FBgn0032727	CG10623	protein_coding		1157.12	-0.965329	7.71782e-11	10.1125	996.028	937.942	948.607	1995.73	1815.23
FBgn0086906	sls	protein_coding	sallimus [Source:FlyBase gene name;Acc:FBgn0086906]	1017.48	-0.964666	7.19738e-10	9.14283	949.382	866.901	708.391	1619.81	1719.59
FBgn0033782	sug	protein_coding	sugarbabe [Source:FlyBase gene name;Acc:FBgn0033782]	2880.74	-0.963449	0.000289117	3.53893	1810.96	2282.93	2787.81	4688.47	4696.11
FBgn0052557	CG32557	protein_coding		763.432	-0.95299	2.18647e-11	10.6603	512.191	536.653	503.309	1115.68	912.815
FBgn0261560	Thor	protein_coding	Thor [Source:FlyBase gene name;Acc:FBgn0261560]	5894.66	-0.948811	0.00106371	2.97318	7017.93	4685.87	5070.67	10836.8	12148.3
FBgn0052062	A2bp1	protein_coding	Ataxin-2 binding protein 1 [Source:FlyBase gene name;Acc:FBgn0052062]	81.839	-0.948756	0.000265907	3.57527	72.2555	66.2416	55.5601	129.322	130.996
FBgn0038719	CG16727	protein_coding		1775.4	-0.947658	0.000357898	3.44624	2032.3	1667.56	1163.49	3638.55	2938.06
FBgn0036428	Gbs-70E	protein_coding	Glycogen binding subunit 70E [Source:FlyBase gene name;Acc:FBgn0036428]	1034.51	-0.942927	4.06554e-07	6.39088	741.762	901.462	930.631	1727.22	1649.93
FBgn0085484	Pdxk	protein_coding	Pyridoxal kinase [Source:FlyBase gene name;Acc:FBgn0085484]	4606.06	-0.941843	1.79043e-17	16.747	4228.32	3791.13	4055.07	8034.41	7568.67
FBgn0052407	CG32407	protein_coding		833.292	-0.937313	0.000526302	3.27876	524.995	383.049	296.593	785.796	809.889
FBgn0034588	CG9394	protein_coding		6600.38	-0.9369	3.27269e-06	5.4851	2678.03	4248.1	3838.55	7075.45	7007.26
FBgn0261445	sgl	protein_coding	sugarless [Source:FlyBase gene name;Acc:FBgn0261445]	2736.12	-0.935599	1.59331e-19	18.7977	1959.13	1857.64	1866.98	3855.55	3441.25
FBgn0085434	NaCP60E	protein_coding	Na channel protein 60E [Source:FlyBase gene name;Acc:FBgn0085434]	194.812	-0.935444	4.41932e-05	4.35464	210.364	199.685	160.961	383.583	372.196
FBgn0037525	CG17816	protein_coding		114.56	-0.933957	7.01309e-05	4.15409	88.7187	90.2422	73.5354	173.16	159.067
FBgn0260743	GC1	protein_coding	Glutamate Carrier 1 [Source:FlyBase gene name;Acc:FBgn0260743]	1155.06	-0.933121	8.30243e-10	9.08079	840.541	889.941	790.097	1672.42	1581.31
FBgn0017558	Pdk	protein_coding	Pyruvate dehydrogenase kinase [Source:FlyBase gene name;Acc:FBgn0017558]	1582.95	-0.932792	1.02011e-13	12.9914	1199.07	1151.07	1198.63	2248.89	2314.27
FBgn0038053	CG18549	protein_coding		420.518	-0.930184	1.10354e-11	10.9572	346.643	321.608	350.519	671.817	639.386
FBgn0020385	pug	protein_coding	pugilist [Source:FlyBase gene name;Acc:FBgn0020385]	961.084	-0.930174	1.75878e-09	8.75479	552.434	662.416	654.465	1291.03	1117.63
FBgn0039645	CG11898	protein_coding		919.151	-0.92863	9.7178e-12	11.0124	799.383	696.017	742.707	1477.34	1399.37
FBgn0037070	CG11309	protein_coding		2716.95	-0.928624	3.70708e-15	14.431	1920.71	2066.93	2072.06	4008.99	3750.03
FBgn0011770	Gip	protein_coding	GIP-like [Source:FlyBase gene name;Acc:FBgn0011770]	1221.73	-0.927673	1.5587e-05	4.80724	804.871	591.374	652.831	1388.57	1277.73
FBgn0010497	dmGlut	protein_coding	Dietary and metabolic glutamate transporter [Source:FlyBase gene name;Acc:FBgn0010497]	8780.18	-0.925355	0.00122283	2.91263	4280.45	8344.52	8215.54	14063.2	13787.9
FBgn0031184	CG14615	protein_coding		466.248	-0.923406	2.08076e-06	5.68178	374.082	373.449	295.776	679.489	670.576
FBgn0027539	CG5807	protein_coding		376.827	-0.923044	0.000403697	3.39394	215.852	298.567	294.959	517.288	548.937
FBgn0039778	Jon99Fi	protein_coding	Jonah 99Fi [Source:FlyBase gene name;Acc:FBgn0039778]	23875.2	-0.921223	5.73397e-15	14.2415	21216.6	23827.8	25620.5	46477.1	43716.4
FBgn0002719	Men	protein_coding	Malic enzyme [Source:FlyBase gene name;Acc:FBgn0002719]	3914.57	-0.919943	1.02808e-05	4.98797	2881.99	1915.25	1844.1	4168.99	4407.09
FBgn0032029	CG17292	protein_coding		891.715	-0.918731	1.80598e-07	6.74329	565.239	650.896	660.184	1270.21	1139.46
FBgn0038407	CG6126	protein_coding		801.985	-0.918531	3.96231e-10	9.40205	772.859	697.937	652.014	1407.2	1307.88
FBgn0036697	rogdi	protein_coding	rogdi [Source:FlyBase gene name;Acc:FBgn0036697]	1081.22	-0.91541	3.78141e-10	9.42235	775.603	855.381	859.547	1557.35	1616.66
FBgn0040687	CG14645	protein_coding		56995.6	-0.913412	7.28509e-12	11.1376	44486.5	43134.8	51091.6	93735.5	82463.2
FBgn0052687	CG32687	protein_coding		4517.53	-0.91285	1.07376e-15	14.9691	3265.21	3425.36	3170.19	6318.15	6159.94
FBgn0085450	Snoo	protein_coding	Sno oncogene [Source:FlyBase gene name;Acc:FBgn0085450]	397.765	-0.912758	1.14158e-06	5.94249	395.118	318.728	281.069	667.434	609.236
FBgn0261808	cu	protein_coding	curled [Source:FlyBase gene name;Acc:FBgn0261808]	877.532	-0.909498	3.64713e-06	5.43805	1032.61	708.497	674.074	1578.17	1527.25
FBgn0025641	DAAM	protein_coding	Dishevelled Associated Activator of Morphogenesis [Source:FlyBase gene name;Acc:FBgn0025641]	842.359	-0.908371	1.86809e-06	5.7286	734.445	641.295	629.136	1399.53	1167.53
FBgn0010053	Jheh1	protein_coding	Juvenile hormone epoxide hydrolase 1 [Source:FlyBase gene name;Acc:FBgn0010053]	2393.41	-0.907082	6.39119e-15	14.1944	1791.75	1716.52	1594.08	3205.65	3223.96
FBgn0263390	Nha2	protein_coding	Na[+]/H[+] hydrogen antiporter 2 [Source:FlyBase gene name;Acc:FBgn0263390]	1058.34	-0.905373	7.02341e-09	8.15345	850.602	647.056	620.966	1385.28	1296.45
FBgn0039844	CG1607	protein_coding		278.069	-0.903284	3.39562e-05	4.46908	280.79	193.925	199.363	453.723	411.702
FBgn0036759	CG5577	protein_coding		458.766	-0.900983	2.17278e-09	8.66298	292.68	272.647	296.593	540.303	546.857
FBgn0033543	CG12338	protein_coding		1054.08	-0.898202	5.46844e-10	9.26214	645.726	734.418	791.731	1401.72	1330.76
FBgn0035495	CG14989	protein_coding		478.976	-0.895889	7.60864e-08	7.11869	390.545	304.327	339.897	633.459	671.616
FBgn0259176	bun	protein_coding	bunched [Source:FlyBase gene name;Acc:FBgn0259176]	4974.45	-0.895642	1.58195e-09	8.80081	4793.56	4050.34	3770.73	7528.08	8342.17
FBgn0002973	numb	protein_coding	numb [Source:FlyBase gene name;Acc:FBgn0002973]	1958.45	-0.895107	5.7171e-09	8.24282	1828.34	1506.28	1424.14	3162.91	2824.74
FBgn0004387	Klp98A	protein_coding	Kinesin-like protein at 98A [Source:FlyBase gene name;Acc:FBgn0004387]	511.711	-0.894588	6.70099e-06	5.17386	525.91	352.328	357.872	795.66	773.502
FBgn0035542	DOR	protein_coding		1961.5	-0.894349	3.72774e-08	7.42855	1663.7	1371.87	1392.27	2755.22	2817.46
FBgn0028480	CG17841	protein_coding		3849.93	-0.893936	2.77992e-07	6.55597	3546.01	2497.98	2661.98	5500.57	5483.13
FBgn0015001	iotaTry	protein_coding	iotaTrypsin [Source:FlyBase gene name;Acc:FBgn0015001]	2002.34	-0.889215	2.20865e-17	16.6559	1505.47	1474.6	1623.5	2837.41	2887.12
FBgn0039670	CG7567	protein_coding		452.714	-0.889087	0.000287377	3.54155	214.022	288.007	303.129	565.51	459.526
FBgn0063491	GstE9	protein_coding	Glutathione S transferase E9 [Source:FlyBase gene name;Acc:FBgn0063491]	963.266	-0.888897	2.23823e-05	4.6501	805.786	600.014	518.016	1265.82	1168.57
FBgn0038337	CG6125	protein_coding		2004.3	-0.887412	8.49303e-07	6.07094	1371.94	1539.88	1464.99	3029.21	2471.25
FBgn0033853	CG6145	protein_coding		793.288	-0.886408	2.70131e-05	4.56843	755.481	504.012	495.955	1063.07	1156.09
FBgn0037782	Npc2d	protein_coding	Niemann-Pick type C-2d [Source:FlyBase gene name;Acc:FBgn0037782]	2652.94	-0.88516	5.67587e-07	6.24597	1909.74	2013.17	2114.55	3617.73	3953.8
FBgn0035432	ZnT63C	protein_coding	Zinc transporter 63C [Source:FlyBase gene name;Acc:FBgn0035432]	2531.39	-0.884944	1.10169e-06	5.95794	1515.54	2285.81	2020.59	3865.42	3443.33
FBgn0003358	Jon99Ci	protein_coding	Jonah 99Ci [Source:FlyBase gene name;Acc:FBgn0003358]	12526.5	-0.884341	0.000645021	3.19043	7072.8	8074.75	5249.61	13494.4	12453
FBgn0032779	CG16771	protein_coding		1794.73	-0.881998	1.01501e-09	8.99353	1667.36	1502.44	1514.83	3062.08	2772.75
FBgn0036833	CG3819	protein_coding		12024.9	-0.881377	6.23126e-05	4.20542	6102.38	7678.26	6756.27	14114.7	11727.3
FBgn0031523	CG15408	protein_coding		840.56	-0.881048	0.000339932	3.46861	653.043	699.857	647.929	1362.27	1184.16
FBgn0040813	Nplp2	protein_coding	Neuropeptide-like precursor 2 [Source:FlyBase gene name;Acc:FBgn0040813]	1357.62	-0.879546	0.000413746	3.38327	853.346	600.974	761.5	1419.26	1379.62
FBgn0017482	T3dh	protein_coding	Type III alcohol dehydrogenase [Source:FlyBase gene name;Acc:FBgn0017482]	493.406	-0.875059	3.63689e-09	8.43927	401.521	386.889	349.702	664.146	744.391
FBgn0033913	CG8468	protein_coding		2349.87	-0.875053	1.68005e-06	5.77468	2082.6	1996.85	1802.43	3977.2	3366.4
FBgn0021765	scu	protein_coding	scully [Source:FlyBase gene name;Acc:FBgn0021765]	1252.1	-0.871823	6.49075e-15	14.1877	946.638	913.942	969.033	1829.14	1649.93
FBgn0037913	fabp	protein_coding	fatty acid bindin protein [Source:FlyBase gene name;Acc:FBgn0037913]	5589.22	-0.871371	1.29558e-22	21.8875	4311.55	4134.82	4358.2	7667.27	8024.04
FBgn0050339	CG30339	protein_coding		751.002	-0.868671	2.24843e-09	8.64812	571.641	553.933	527.821	1074.03	962.718
FBgn0023537	CG17896	protein_coding		3708.66	-0.868145	5.76184e-07	6.23944	2613.09	2870.47	2611.32	5256.18	4762.65
FBgn0085353	CG34324	protein_coding		39313.8	-0.867603	3.29931e-10	9.48158	36108.5	34623.2	32798.4	70686.6	56829.5
FBgn0051267	CG31267	protein_coding		1091.53	-0.867133	1.16019e-06	5.93547	872.553	889.941	1003.35	1627.49	1803.8
FBgn0026061	Mipp1	protein_coding	Multiple inositol polyphosphate phosphatase 1 [Source:FlyBase gene name;Acc:FBgn0026061]	2704.86	-0.866805	3.60591e-15	14.443	1900.59	1882.61	1825.31	3513.62	3352.88
FBgn0261673	nemy	protein_coding	no extended memory [Source:FlyBase gene name;Acc:FBgn0261673]	1888.62	-0.865901	8.33392e-05	4.07915	1295.11	1401.63	1230.49	2692.75	2204.06
FBgn0037548	CG7900	protein_coding		765.263	-0.865507	1.89569e-05	4.72223	819.505	984.984	964.131	1790.78	1718.55
FBgn0020306	dom	protein_coding	domino [Source:FlyBase gene name;Acc:FBgn0020306]	3284.87	-0.859846	2.56757e-09	8.59048	3302.71	2594.94	2420.95	5264.94	4928.99
FBgn0011286	RyR	protein_coding	Ryanodine receptor [Source:FlyBase gene name;Acc:FBgn0011286]	138.547	-0.859792	0.000648048	3.18839	131.706	114.243	99.6813	195.079	238.08
FBgn0030482	CG1673	protein_coding		290.646	-0.85731	0.00106481	2.97273	195.73	205.445	168.314	344.128	369.077
FBgn0036232	CG14125	protein_coding		16657.4	-0.856097	4.69402e-12	11.3285	12028.2	12392	12403.8	23898.3	20927.2
FBgn0034356	CG10924	protein_coding		805.985	-0.855776	2.89532e-11	10.5383	974.991	866.901	850.559	1672.42	1615.62
FBgn0030968	CG7322	protein_coding		715.62	-0.855607	7.22867e-07	6.14094	501.215	506.892	512.297	985.259	879.546
FBgn0020545	kraken	protein_coding	kraken [Source:FlyBase gene name;Acc:FBgn0020545]	2245.3	-0.853142	7.554e-10	9.12182	1795.41	1591.72	1739.52	3169.49	3074.25
FBgn0012034	AcCoAS	protein_coding	Acetyl Coenzyme A synthase [Source:FlyBase gene name;Acc:FBgn0012034]	5362.95	-0.852981	5.11328e-10	9.2913	4962.76	3982.18	4147.4	7989.48	7955.42
FBgn0035309	CG15879	protein_coding		428.178	-0.850008	4.40278e-08	7.35627	393.289	421.45	460.005	741.958	816.127
FBgn0051266	CG31266	protein_coding		1595.93	-0.84688	2.51419e-05	4.5996	1125.9	1488.04	1734.62	2674.12	2672.95
FBgn0033397	Cyp4p3	protein_coding	Cyp4p3 [Source:FlyBase gene name;Acc:FBgn0033397]	384.402	-0.846538	2.58028e-05	4.58833	292.68	290.887	223.874	436.188	551.016
FBgn0001332	L	protein_coding	Lobe [Source:FlyBase gene name;Acc:FBgn0001332]	1020.85	-0.845002	6.53995e-11	10.1844	879.87	888.021	783.56	1558.44	1527.25
FBgn0039644	CG11897	protein_coding		1439.69	-0.841976	8.15052e-09	8.08881	1439.62	1207.71	1156.96	2392.46	2214.46
FBgn0037144	CG7458	protein_coding		474.341	-0.84134	4.20739e-07	6.37599	351.216	372.489	384.835	691.545	653.942
FBgn0033194	Vps13	protein_coding	Vacuolar protein sorting 13 [Source:FlyBase gene name;Acc:FBgn0033194]	2131.78	-0.840012	1.5166e-12	11.8191	1759.74	1888.37	1745.24	3246.2	3244.76
FBgn0261955	kdn	protein_coding	knockdown [Source:FlyBase gene name;Acc:FBgn0261955]	12292.2	-0.84001	2.20108e-08	7.65736	7607.86	9418.79	9526.92	16004.2	16073
FBgn0040384	CG32795	protein_coding		2358.62	-0.838531	9.74264e-13	12.0113	1722.24	1706.92	1696.22	2964.55	3191.73
FBgn0033917	CG8503	protein_coding		123.249	-0.835256	0.000123564	3.90811	117.072	105.603	116.023	222.478	192.336
FBgn0039470	CG6296	protein_coding		3662.73	-0.834884	0.0010119	2.99486	2042.36	3276.56	3303.37	5350.43	5482.09
FBgn0037363	Atg17	protein_coding	Autophagy-related 17 [Source:FlyBase gene name;Acc:FBgn0037363]	1357.94	-0.834366	1.24854e-08	7.9036	1444.19	1132.83	1207.61	2358.48	2201.98
FBgn0035397	CG11486	protein_coding		2562.33	-0.834222	2.55626e-10	9.59239	2389	2012.21	1891.49	3764.59	3790.57
FBgn0041094	scyl	protein_coding	scylla [Source:FlyBase gene name;Acc:FBgn0041094]	2598.41	-0.833364	3.81563e-05	4.41843	2547.23	2298.3	2092.49	4104.33	4339.51
FBgn0032752	CG10702	protein_coding		136.597	-0.832245	0.000599841	3.22196	157.316	103.682	114.388	240.013	221.446
FBgn0012036	Aldh	protein_coding	Aldehyde dehydrogenase [Source:FlyBase gene name;Acc:FBgn0012036]	6053.98	-0.831172	8.25917e-08	7.08306	4034.42	3774.81	3546.04	6947.23	6674.57
FBgn0036875	CG9449	protein_coding		167.967	-0.830003	1.75588e-05	4.7555	176.523	166.084	172.4	288.235	336.847
FBgn0000504	dsx	protein_coding	doublesex [Source:FlyBase gene name;Acc:FBgn0000504]	415.589	-0.828198	1.89524e-07	6.72234	379.57	350.408	320.287	645.515	615.474
FBgn0030478	CG1640	protein_coding		3522.89	-0.825668	6.99268e-13	12.1554	2528.94	2858.95	2648.09	4847.39	4716.9
FBgn0034145	CG5065	protein_coding		2066.69	-0.824501	1.6025e-07	6.7952	2023.15	1832.68	1576.11	3104.83	3401.74
FBgn0261975	CG42806	protein_coding		417.473	-0.823343	5.50432e-05	4.2593	258.839	295.687	285.971	506.329	506.311
FBgn0261549	rdgA	protein_coding	retinal degeneration A [Source:FlyBase gene name;Acc:FBgn0261549]	307.705	-0.820056	1.51397e-05	4.81988	309.144	288.967	245.935	514.001	500.073
FBgn0266579	tau	protein_coding	tau [Source:FlyBase gene name;Acc:FBgn0266579]	698.068	-0.817848	1.05976e-06	5.97479	550.605	562.573	447.749	979.779	880.586
FBgn0261599	RpS29	protein_coding	Ribosomal protein S29 [Source:FlyBase gene name;Acc:FBgn0261599]	14357.6	-0.816242	2.87251e-12	11.5417	12778.2	10483.5	12215.9	21078.4	20910.5
FBgn0259993	CR42491	lincRNA		221.667	-0.815317	0.000210045	3.67769	187.498	164.164	174.034	298.098	334.768
FBgn0000024	Ace	protein_coding	Acetylcholine esterase [Source:FlyBase gene name;Acc:FBgn0000024]	460.297	-0.814742	0.000189091	3.72333	492.983	380.169	294.142	686.065	718.4
FBgn0001128	Gpdh	protein_coding	Glycerol 3 phosphate dehydrogenase [Source:FlyBase gene name;Acc:FBgn0001128]	6768.13	-0.814362	9.6022e-08	7.01763	4853.92	5009.4	4854.97	8822.4	8639.51
FBgn0036192	Pallidin	protein_coding	Pallidin ortholog (H. sapiens) [Source:FlyBase gene name;Acc:FBgn0036192]	325.769	-0.81266	0.000278637	3.55496	228.657	286.087	304.763	455.915	531.263
FBgn0265042	Irk1	protein_coding	Inwardly rectifying potassium channel 1 [Source:FlyBase gene name;Acc:FBgn0265042]	2807.33	-0.81018	6.43348e-06	5.19155	2166.75	2505.66	2388.27	4593.13	3809.29
FBgn0039882	CG11576	protein_coding		1407.51	-0.809627	4.46878e-13	12.3498	1243.89	1223.07	1131.63	2189.71	2045
FBgn0031374	CG7337	protein_coding		1530.61	-0.809534	5.86205e-08	7.23195	1593.28	1330.59	1223.14	2579.87	2329.86
FBgn0265192	Snp	protein_coding	Snipper [Source:FlyBase gene name;Acc:FBgn0265192]	374.059	-0.808181	7.30126e-08	7.1366	301.827	305.287	283.52	546.879	505.271
FBgn0027571	CG3523	protein_coding		6928.03	-0.807534	5.93557e-07	6.22654	4581.36	4294.18	3967.64	7605.89	7553.08
FBgn0034644	CG10082	protein_coding		1436.26	-0.803201	7.95065e-08	7.0996	1268.59	1380.51	1532.8	2624.8	2310.11
FBgn0263916	Ent2	protein_coding	Equilibrative nucleoside transporter 2 [Source:FlyBase gene name;Acc:FBgn0263916]	1001.47	-0.801627	1.39261e-11	10.8562	815.846	778.579	725.549	1373.23	1342.19
FBgn0085443	spri	protein_coding	sprint [Source:FlyBase gene name;Acc:FBgn0085443]	361.5	-0.800931	1.40499e-05	4.85233	278.046	284.167	262.276	532.632	441.852
FBgn0039154	Npc2f	protein_coding	Niemann-Pick type C-2f [Source:FlyBase gene name;Acc:FBgn0039154]	2071.73	-0.799199	8.37535e-12	11.077	1588.71	1544.68	1576.93	2917.42	2588.74
FBgn0038804	CG10877	protein_coding		763.867	-0.799059	4.09687e-05	4.38755	750.908	551.053	519.65	1144.17	1011.58
FBgn0038197	foxo	protein_coding	forkhead box, sub-group O [Source:FlyBase gene name;Acc:FBgn0038197]	1086.53	-0.798846	8.57123e-06	5.06696	1037.19	742.098	730.452	1478.44	1480.47
FBgn0037687	CG8132	protein_coding		364.368	-0.798791	0.000154746	3.81038	311.887	222.725	232.045	465.779	442.892
FBgn0035588	CG10672	protein_coding		813.989	-0.798567	1.05117e-07	6.97833	503.959	686.416	611.978	1075.13	1038.61
FBgn0261976	Psf2	protein_coding	Psf2 [Source:FlyBase gene name;Acc:FBgn0261976]	194.757	-0.797144	0.00119651	2.92208	98.7796	123.843	106.218	200.559	190.256
FBgn0053126	NLaz	protein_coding	Neural Lazarillo [Source:FlyBase gene name;Acc:FBgn0053126]	1847.64	-0.79645	2.35779e-08	7.6275	1709.44	1609.96	1390.64	2658.77	2858.01
FBgn0020386	Pdk1	protein_coding	Phosphoinositide-dependent kinase 1 [Source:FlyBase gene name;Acc:FBgn0020386]	1891.99	-0.793373	5.20564e-07	6.28353	1468.89	1924.85	1763.22	3189.21	2860.08
FBgn0046114	Gclm	protein_coding	Glutamate-cysteine ligase modifier subunit [Source:FlyBase gene name;Acc:FBgn0046114]	2403.12	-0.792744	4.45718e-08	7.35094	1548.46	1982.45	2008.33	3226.48	3242.68
FBgn0004646	ogre	protein_coding	optic ganglion reduced [Source:FlyBase gene name;Acc:FBgn0004646]	193.224	-0.791571	0.000621646	3.20646	184.754	139.203	133.181	286.043	255.755
FBgn0261285	Ppcs	protein_coding	Phosphopantothenoylcysteine synthetase [Source:FlyBase gene name;Acc:FBgn0261285]	527.802	-0.790762	4.3299e-10	9.36352	481.093	429.13	448.566	793.468	788.057
FBgn0027499	wde	protein_coding	windei [Source:FlyBase gene name;Acc:FBgn0027499]	329.093	-0.788978	6.33449e-06	5.19829	253.351	300.487	291.69	523.864	466.804
FBgn0034488	CG11208	protein_coding		2414.59	-0.78765	1.07126e-11	10.9701	1780.78	1910.45	1827.76	3251.68	3144.95
FBgn0037057	CG10512	protein_coding		435.421	-0.787553	3.79326e-06	5.42099	366.765	350.408	281.886	566.606	598.84
FBgn0261703	gce	protein_coding	germ cell-expressed bHLH-PAS [Source:FlyBase gene name;Acc:FBgn0261703]	1337.64	-0.786546	0.000512729	3.29011	1639.01	1001.3	930.631	2166.69	2055.39
FBgn0025697	santa-maria	protein_coding	scavenger receptor acting in neural tissue and majority of rhodopsin is absent [Source:FlyBase gene name;Acc:FBgn0025697]	579.484	-0.78358	5.79535e-06	5.23692	615.543	492.492	457.554	906.351	920.093
FBgn0051463	CG31463	protein_coding		743.765	-0.783293	1.60981e-05	4.79323	536.885	504.972	452.651	864.705	876.427
FBgn0259175	ome	protein_coding	omega [Source:FlyBase gene name;Acc:FBgn0259175]	4922.64	-0.782278	2.72977e-11	10.5639	3856.98	4616.75	4277.31	7409.72	7323.31
FBgn0035173	CG13907	protein_coding		3579.29	-0.782151	1.2314e-12	11.9096	3700.58	3227.6	3094.21	5896.21	5676.5
FBgn0029896	CG3168	protein_coding		24864.9	-0.781379	5.67587e-07	6.24597	17943.1	22383.9	19870.1	37567	32297.8
FBgn0036152	CG6175	protein_coding		379.923	-0.780888	1.24475e-07	6.90492	352.131	321.608	300.678	583.045	545.818
FBgn0037440	CG1041	protein_coding		856.268	-0.779524	1.1484e-07	6.93991	607.312	720.977	687.964	1216.5	1116.59
FBgn0033903	CG8323	protein_coding		850.19	-0.778857	2.38899e-07	6.62179	681.396	622.095	612.795	1161.71	1055.25
FBgn0021776	mira	protein_coding	miranda [Source:FlyBase gene name;Acc:FBgn0021776]	258.562	-0.778684	0.000389127	3.40991	275.302	249.606	198.546	414.269	434.575
FBgn0038652	CG7720	protein_coding		4247.37	-0.775454	0.000156509	3.80546	6363.97	4253.86	5551.11	10125.5	8911.9
FBgn0037203	slif	protein_coding	slimfast [Source:FlyBase gene name;Acc:FBgn0037203]	3648.84	-0.77544	0.000108289	3.96541	2367.05	2889.67	2705.29	4787.11	4476.74
FBgn0032850	Kua	protein_coding	Kua [Source:FlyBase gene name;Acc:FBgn0032850]	492.491	-0.771314	5.07797e-06	5.29431	407.923	460.811	419.152	756.206	731.915
FBgn0086367	t	protein_coding	tan [Source:FlyBase gene name;Acc:FBgn0086367]	456.606	-0.770039	0.000579059	3.23728	452.74	375.369	285.971	692.64	605.078
FBgn0050055	CR30055	lincRNA		180.479	-0.769974	0.00018963	3.72209	190.242	139.203	153.607	292.619	269.27
FBgn0031428	CG9886	protein_coding		171.696	-0.768021	0.000513661	3.28932	144.511	119.043	113.571	221.382	216.248
FBgn0031865	Nha1	protein_coding	Na[+]/H[+] hydrogen antiporter 1 [Source:FlyBase gene name;Acc:FBgn0031865]	3944.32	-0.767703	9.05905e-09	8.04292	3335.64	3209.36	3014.13	5590.44	5361.49
FBgn0023076	Clk	protein_coding	Clock [Source:FlyBase gene name;Acc:FBgn0023076]	456.268	-0.767105	0.000240585	3.61873	267.985	418.57	373.396	585.237	642.505
FBgn0034197	Cda9	protein_coding	Chitin deacetylase-like 9 [Source:FlyBase gene name;Acc:FBgn0034197]	247.189	-0.766896	0.000177101	3.75178	256.095	284.167	240.216	429.612	479.28
FBgn0267336	Glut4EF	protein_coding		1225.08	-0.760262	1.24085e-08	7.90628	1228.34	1097.31	1016.42	1948.6	1862.02
FBgn0029969	CG10932	protein_coding		845.579	-0.759491	8.61479e-08	7.06476	760.969	691.217	646.294	1261.44	1131.14
FBgn0266377	Pde8	protein_coding	Phosphodiesterase 8 [Source:FlyBase gene name;Acc:FBgn0266377]	1292.65	-0.758417	5.08564e-08	7.29365	1186.27	1078.11	955.96	1970.52	1697.75
FBgn0259224	CG42324	protein_coding		452.787	-0.757397	8.16724e-05	4.08792	355.79	462.731	391.372	674.009	716.321
FBgn0003891	tud	protein_coding	tudor [Source:FlyBase gene name;Acc:FBgn0003891]	4241.08	-0.756872	4.58001e-11	10.3391	3435.34	3584.73	3228.2	5883.06	5739.92
FBgn0036738	CG7542	protein_coding		18249.5	-0.756811	1.58873e-08	7.79895	19269.3	20521.5	20116	34638.6	34172.3
FBgn0001145	Gs2	protein_coding	Glutamine synthetase 2 [Source:FlyBase gene name;Acc:FBgn0001145]	6649.26	-0.756419	1.2583e-05	4.90022	3957.59	4827	5127.05	7421.77	8452.38
FBgn0031258	CG4297	protein_coding		262.676	-0.754004	0.000845452	3.07291	279.876	204.485	187.107	412.077	361.799
FBgn0031645	CG3036	protein_coding		4442.19	-0.753988	5.94578e-09	8.22579	4159.72	4080.1	3843.45	6897.91	6813.88
FBgn0030946	CG6659	protein_coding		4663.21	-0.752964	1.34746e-12	11.8705	4045.39	4167.46	3930.06	6942.84	6789.97
FBgn0037874	Tctp	protein_coding	Translationally controlled tumor protein ortholog (H. sapiens) [Source:FlyBase gene name;Acc:FBgn0037874]	9775.91	-0.75244	1.14394e-10	9.9416	8713.64	7573.62	7847.86	13703.8	13599.7
FBgn0051300	CG31300	protein_coding		1370.86	-0.751317	0.000424286	3.37234	1353.65	841.94	825.231	1764.48	1694.63
FBgn0031517	CG15406	protein_coding		3371.65	-0.749889	4.71182e-05	4.32681	2074.37	2139.89	2533.7	4303.8	3373.67
FBgn0032085	CG9555	protein_coding		1003.67	-0.749423	9.95532e-06	5.00194	886.273	786.259	783.56	1326.1	1466.95
FBgn0033451	CG1665	protein_coding		405.359	-0.749365	1.44565e-07	6.83994	313.717	311.047	299.044	533.728	511.509
FBgn0037000	ZnT77C	protein_coding	Zinc transporter 77C [Source:FlyBase gene name;Acc:FBgn0037000]	379.113	-0.749138	0.000329895	3.48162	256.095	328.328	301.495	497.561	515.668
FBgn0031824	CG9547	protein_coding		331.415	-0.748925	5.49734e-05	4.25985	235.974	270.726	250.837	480.026	382.592
FBgn0027556	CG4928	protein_coding		9086.42	-0.748679	2.38899e-07	6.62179	7348.11	7847.23	7678.73	13462.7	12437.4
FBgn0050495	CG30495	protein_coding		285.41	-0.747325	0.000175084	3.75675	154.572	197.765	185.473	310.154	301.499
FBgn0011204	cue	protein_coding	cueball [Source:FlyBase gene name;Acc:FBgn0011204]	1509.53	-0.746244	4.62373e-07	6.33501	1122.25	1389.15	1419.23	2233.55	2213.42
FBgn0051663	CG31663	protein_coding		2171.44	-0.743785	2.45953e-05	4.60915	1572.24	2029.49	1898.85	3433.61	2804.98
FBgn0030616	RpL37a	protein_coding	Ribosomal protein L37a [Source:FlyBase gene name;Acc:FBgn0030616]	14784.7	-0.743072	3.94121e-10	9.40437	13289.5	10609.2	12138.2	19884.9	20624.6
FBgn0035087	CG2765	protein_coding		2756.55	-0.742063	4.06155e-06	5.39131	1813.7	2208.05	2427.48	3497.18	3784.34
FBgn0032603	CG17928	protein_coding		235.195	-0.741426	0.000494863	3.30552	156.401	190.085	146.254	275.083	283.825
FBgn0000382	csw	protein_coding	corkscrew [Source:FlyBase gene name;Acc:FBgn0000382]	599.772	-0.740395	3.56801e-08	7.44757	554.263	569.294	494.321	928.27	889.943
FBgn0259111	Ndae1	protein_coding	Na[+]-driven anion exchanger 1 [Source:FlyBase gene name;Acc:FBgn0259111]	3713.92	-0.740041	5.3112e-06	5.27481	3448.14	2848.39	2560.67	5043.56	4944.59
FBgn0265623	Su(z)2	protein_coding	Suppressor of zeste 2 [Source:FlyBase gene name;Acc:FBgn0265623]	236.357	-0.73938	2.89712e-05	4.53803	189.328	222.725	223.057	369.335	349.323
FBgn0050410	Rpi	protein_coding	Ribose-5-phosphate isomerase [Source:FlyBase gene name;Acc:FBgn0050410]	544.096	-0.738569	1.02859e-08	7.98776	378.655	351.368	354.604	601.677	613.395
FBgn0259236	comm3	protein_coding	comm3 [Source:FlyBase gene name;Acc:FBgn0259236]	522.282	-0.735808	3.55183e-06	5.44955	465.545	412.81	361.958	743.054	649.783
FBgn0040636	CG13255	protein_coding		892.569	-0.73575	0.00108548	2.96438	1086.58	629.775	737.805	1414.87	1380.66
FBgn0034629	Acox57D-d	protein_coding	acyl-Coenzyme A oxidase at 57D distal [Source:FlyBase gene name;Acc:FBgn0034629]	2202.62	-0.734785	0.00047273	3.32539	2191.44	1587.88	1398.81	2974.41	2888.16
FBgn0086450	su(r)	protein_coding	suppressor of rudimentary [Source:FlyBase gene name;Acc:FBgn0086450]	2772.17	-0.733949	5.52334e-08	7.2578	1865.84	1993.97	1983	3264.84	3266.59
FBgn0003515	st	protein_coding	scarlet [Source:FlyBase gene name;Acc:FBgn0003515]	821.763	-0.73193	7.99379e-05	4.09725	676.823	721.937	710.025	1326.1	1049.01
FBgn0031589	CG3714	protein_coding		1723.88	-0.731558	0.000112903	3.9473	1011.58	1224.03	1064.63	2023.12	1682.16
FBgn0038391	GATAe	protein_coding	GATAe [Source:FlyBase gene name;Acc:FBgn0038391]	2097.65	-0.730639	1.30827e-07	6.8833	1657.3	1801	1920.91	3017.15	2992.12
FBgn0040305	MTF-1	protein_coding	Metal response element-binding Transcription Factor-1 [Source:FlyBase gene name;Acc:FBgn0040305]	1476.66	-0.727997	1.31645e-11	10.8806	1364.62	1258.59	1353.87	2230.26	2189.51
FBgn0032116	Mco1	protein_coding	Multicopper oxidase-1 [Source:FlyBase gene name;Acc:FBgn0032116]	1993.99	-0.727748	0.000158571	3.79977	2244.49	1684.84	1448.65	3341.55	2708.3
FBgn0015288	RpL22	protein_coding	Ribosomal protein L22 [Source:FlyBase gene name;Acc:FBgn0015288]	5247.77	-0.726495	3.90191e-09	8.40872	4872.21	3945.69	4024.84	7233.27	7041.57
FBgn0034215	Mtap	protein_coding	Methylthioadenosine phosphorylase ortholog [Source:FlyBase gene name;Acc:FBgn0034215]	714.83	-0.72577	9.93415e-07	6.00287	497.557	573.134	640.575	1000.6	907.617
FBgn0259101	CG42249	protein_coding		8612.4	-0.724271	1.44825e-08	7.83916	5887.45	6575.2	6547.92	10937.6	10161.6
FBgn0086355	Tpi	protein_coding	Triose phosphate isomerase [Source:FlyBase gene name;Acc:FBgn0086355]	2503.4	-0.722957	2.83275e-07	6.54779	2073.46	1725.16	1628.4	3138.8	2884
FBgn0036493	CG7255	protein_coding		1653.61	-0.72269	2.87077e-06	5.542	1491.76	1295.07	1152.05	2274.1	2107.38
FBgn0010223	Galphaf	protein_coding	G protein alpha f subunit [Source:FlyBase gene name;Acc:FBgn0010223]	908.604	-0.721492	4.19776e-07	6.37698	725.298	687.376	628.319	1174.86	1088.52
FBgn0027586	CG5867	protein_coding		763.31	-0.721117	1.00392e-05	4.9983	551.52	708.497	634.038	977.587	1129.06
FBgn0036857	CG9629	protein_coding		721.809	-0.718752	1.21559e-05	4.91521	590.848	596.174	519.65	1003.89	890.982
FBgn0036007	path	protein_coding	pathetic [Source:FlyBase gene name;Acc:FBgn0036007]	2230.6	-0.716307	2.78896e-06	5.55456	1671.94	2017.97	2018.96	3408.4	2917.27
FBgn0033101	CG9436	protein_coding		1376.03	-0.716097	7.99197e-11	10.0973	1069.2	1089.63	1173.3	1879.55	1792.36
FBgn0035667	Jon65Ai	protein_coding	Jonah 65Ai [Source:FlyBase gene name;Acc:FBgn0035667]	11637.1	-0.71582	0.000652451	3.18545	7524.63	6268.95	6310.97	10999	11338.5
FBgn0024957	Irp-1B	protein_coding	Iron regulatory protein 1B [Source:FlyBase gene name;Acc:FBgn0024957]	2894.14	-0.71473	0.000530748	3.27511	2778.63	2211.89	1915.19	4018.85	3682.45
FBgn0027572	CG5009	protein_coding		1036.19	-0.714533	1.70814e-06	5.76748	834.139	821.78	689.599	1333.77	1256.94
FBgn0031815	frj	protein_coding	farjavit [Source:FlyBase gene name;Acc:FBgn0031815]	838.822	-0.714019	2.1989e-08	7.65779	819.505	734.418	687.147	1277.88	1192.48
FBgn0038740	CG4562	protein_coding		15822.6	-0.713472	3.42089e-06	5.46586	12090.4	15438.1	15100.1	24293.9	22870.3
FBgn0032733	CG15170	protein_coding		578.447	-0.71167	3.49711e-05	4.45629	313.717	371.529	306.397	587.429	506.311
FBgn0035204	CG2277	protein_coding		425.073	-0.711192	0.00095798	3.01864	264.327	365.769	335.812	551.263	523.985
FBgn0052695	CG32695	protein_coding		511.239	-0.711012	4.46283e-05	4.35039	293.595	334.088	274.532	482.218	512.549
FBgn0035252	CG7970	protein_coding		2930.52	-0.709887	1.01342e-11	10.9942	2252.72	2214.77	2303.29	3686.78	3734.43
FBgn0040398	CG14629	protein_coding		3261.07	-0.709187	4.69783e-06	5.3281	2353.33	3041.35	3315.63	4923.01	4688.83
FBgn0032706	Irk3	protein_coding	Inwardly rectifying potassium channel 3 [Source:FlyBase gene name;Acc:FBgn0032706]	2709.42	-0.708729	0.000523783	3.28085	2066.14	2497.02	2408.69	4459.42	3288.42
FBgn0032809	CG13078	protein_coding		793.848	-0.708382	0.000510448	3.29205	754.566	725.777	1008.25	1509.12	1269.42
FBgn0038700	CG3734	protein_coding		4068.28	-0.70766	1.25377e-12	11.9018	2857.29	3135.44	3024.76	4853.96	5006.97
FBgn0002921	Atpalpha	protein_coding	Na pump alpha subunit [Source:FlyBase gene name;Acc:FBgn0002921]	18160.8	-0.704858	2.81669e-08	7.55026	14158.4	15762.6	13877.8	24985.5	22965.9
FBgn0032774	CG17549	protein_coding		586.884	-0.701314	0.000177427	3.75098	658.531	470.411	510.662	901.967	906.577
FBgn0036684	CG3764	protein_coding		698.054	-0.700751	3.64713e-06	5.43805	619.202	624.975	547.43	988.547	973.115
FBgn0015806	S6k	protein_coding	RPS6-p70-protein kinase [Source:FlyBase gene name;Acc:FBgn0015806]	3102.54	-0.698813	1.61496e-08	7.79184	2739.31	2729.35	2718.36	4326.81	4599.42
FBgn0035020	CG13585	protein_coding		1203.55	-0.698323	9.48616e-08	7.02291	989.625	777.619	894.681	1422.54	1478.39
FBgn0029504	CHES-1-like	protein_coding	Checkpoint suppressor homologue [Source:FlyBase gene name;Acc:FBgn0029504]	940.752	-0.697233	0.000616699	3.20993	1001.52	800.659	704.306	1408.3	1353.63
FBgn0034432	CG7461	protein_coding		3040.71	-0.692175	1.33032e-14	13.876	2587.48	2576.7	2469.97	4278.59	3976.67
FBgn0025525	bab2	protein_coding	bric a brac 2 [Source:FlyBase gene name;Acc:FBgn0025525]	1154.88	-0.691623	3.62062e-06	5.44122	1087.49	1001.3	930.631	1635.16	1649.93
FBgn0051077	CG31077	protein_coding		3547.38	-0.690017	0.0008243	3.08391	2668.88	3377.36	2695.48	5039.18	4532.89
FBgn0034715	Oatp58Db	protein_coding	Organic anion transporting polypeptide 58Db [Source:FlyBase gene name;Acc:FBgn0034715]	567.842	-0.688653	0.00140904	2.85108	402.435	319.688	295.776	604.964	505.271
FBgn0017581	Lk6	protein_coding	Lk6 [Source:FlyBase gene name;Acc:FBgn0017581]	7768.65	-0.688176	8.29478e-11	10.0812	7307.86	7058.09	7221.99	11776	11550.5
FBgn0003016	osp	protein_coding	outspread [Source:FlyBase gene name;Acc:FBgn0003016]	278.413	-0.686986	0.000320753	3.49383	263.412	268.806	218.972	430.708	388.83
FBgn0267033	mamo	protein_coding	maternal gene required for meiosis [Source:FlyBase gene name;Acc:FBgn0267033]	623.762	-0.686906	0.00108548	2.96438	737.189	648.976	475.529	980.875	1060.45
FBgn0026602	Ady43A	protein_coding	Ady43A [Source:FlyBase gene name;Acc:FBgn0026602]	611.943	-0.686147	0.000540822	3.26695	392.375	375.369	405.262	652.09	624.831
FBgn0031561	CG16712	protein_coding		2420.09	-0.686053	0.00110134	2.95808	2916.74	1850.92	1873.52	3679.1	3596.16
FBgn0027621	Pfrx	protein_coding	6-phosphofructo-2-kinase [Source:FlyBase gene name;Acc:FBgn0027621]	1237.28	-0.685826	1.17667e-07	6.92935	1143.28	940.823	964.948	1653.79	1640.57
FBgn0016684	NaPi-T	protein_coding	Na[+]-dependent inorganic phosphate cotransporter [Source:FlyBase gene name;Acc:FBgn0016684]	3618.88	-0.683893	0.000510512	3.29199	2347.85	2661.18	1966.66	4212.83	3361.2
FBgn0052633	CG32633	protein_coding		4124.11	-0.683364	0.000107176	3.9699	2545.4	3105.67	3629.38	5106.03	4954.98
FBgn0001098	Gdh	protein_coding	Glutamate dehydrogenase [Source:FlyBase gene name;Acc:FBgn0001098]	6926.42	-0.683287	1.12865e-07	6.94744	4815.51	5500.93	4445.62	8242.64	7663.28
FBgn0024807	DIP1	protein_coding	DISCO Interacting Protein 1 [Source:FlyBase gene name;Acc:FBgn0024807]	1404.04	-0.682088	1.23283e-06	5.9091	1157.92	1328.67	1429.04	2084.5	2145.84
FBgn0026315	Ugt35a	protein_coding	UDP-glycosyltransferase 35a [Source:FlyBase gene name;Acc:FBgn0026315]	1647.83	-0.68198	2.84169e-09	8.54642	1359.13	1199.07	1267.26	1999.01	2115.69
FBgn0029608	CG3091	protein_coding		3208.46	-0.681498	1.01716e-07	6.99261	3157.29	2679.42	2809.87	4830.95	4489.22
FBgn0051522	CG31522	protein_coding		3076.59	-0.681475	4.72192e-07	6.32588	3021.92	2692.86	2340.88	4284.07	4400.85
FBgn0004396	CrebA	protein_coding	Cyclic-AMP response element binding protein A [Source:FlyBase gene name;Acc:FBgn0004396]	879.32	-0.681383	4.45718e-08	7.35094	735.359	771.859	701.037	1172.67	1203.92
FBgn0041156	exex	protein_coding	extra-extra [Source:FlyBase gene name;Acc:FBgn0041156]	1018.93	-0.68068	0.000135143	3.86921	988.711	854.42	851.376	1542	1379.62
FBgn0266411	sima	protein_coding	similar [Source:FlyBase gene name;Acc:FBgn0266411]	2434.58	-0.679564	7.34443e-09	8.13404	2314.92	2226.29	2209.33	3702.12	3555.61
FBgn0031987	CG12375	protein_coding		636.034	-0.678358	4.72362e-08	7.32572	500.3	514.572	547.43	853.745	825.484
FBgn0014906	Hydr2	protein_coding	alpha/beta hydrolase2 [Source:FlyBase gene name;Acc:FBgn0014906]	1672.71	-0.677182	1.52304e-07	6.81729	1520.11	1420.83	1484.6	2420.95	2334.02
FBgn0019830	colt	protein_coding	congested-like trachea [Source:FlyBase gene name;Acc:FBgn0019830]	1677.92	-0.676975	6.29291e-12	11.2011	1270.42	1230.75	1286.05	2069.15	1985.74
FBgn0039156	CG6178	protein_coding		2305.61	-0.675283	2.38899e-07	6.62179	1654.56	1845.16	1798.35	2898.79	2782.11
FBgn0032775	CG17544	protein_coding		6392.26	-0.672461	6.35746e-07	6.19672	6533.17	7000.49	6725.22	11446.1	10299.8
FBgn0052068	CG32068	protein_coding		1597.29	-0.672022	9.02325e-08	7.04464	1130.48	1087.71	1177.38	1868.59	1762.21
FBgn0052483	CG32483	protein_coding		1817.22	-0.670047	0.000170449	3.76841	1005.17	1465.96	1325.27	2139.29	1937.91
FBgn0015872	Drip	protein_coding	Drip [Source:FlyBase gene name;Acc:FBgn0015872]	1322.39	-0.669407	1.86335e-05	4.72971	1095.72	1497.64	1249.28	2049.43	2073.07
FBgn0010100	Acon	protein_coding	Aconitase [Source:FlyBase gene name;Acc:FBgn0010100]	13169.6	-0.668819	2.65683e-09	8.57564	10089.2	11311	10873.4	18270.6	16128.1
FBgn0020251	sfl	protein_coding	sulfateless [Source:FlyBase gene name;Acc:FBgn0020251]	551.974	-0.667515	5.66764e-05	4.2466	577.129	423.37	455.102	815.387	745.431
FBgn0031883	Caper	protein_coding	Caper [Source:FlyBase gene name;Acc:FBgn0031883]	1531.99	-0.667051	3.96326e-06	5.40195	1598.77	1221.15	1277.88	2218.2	2161.44
FBgn0266446	CG45076	protein_coding		349.921	-0.665509	0.00117071	2.93155	276.217	273.607	312.934	398.926	529.183
FBgn0011656	Mef2	protein_coding	Myocyte enhancer factor 2 [Source:FlyBase gene name;Acc:FBgn0011656]	651.924	-0.664417	0.000273134	3.56362	641.153	491.532	500.041	832.922	915.934
FBgn0020912	Ptx1	protein_coding	Ptx1 [Source:FlyBase gene name;Acc:FBgn0020912]	1858.56	-0.664352	0.000622441	3.2059	2196.93	1422.75	1531.17	2769.47	2766.52
FBgn0261938	mtRNApol	protein_coding	mitochondrial RNA polymerase [Source:FlyBase gene name;Acc:FBgn0261938]	436.237	-0.663931	1.1193e-05	4.95105	385.058	361.929	423.237	644.419	606.117
FBgn0034500	CG11200	protein_coding	Carbonyl reductase [Source:FlyBase gene name;Acc:FBgn0034500]	837.675	-0.661746	2.23507e-08	7.65071	775.603	701.777	738.622	1150.75	1201.84
FBgn0047135	CG32276	protein_coding		2422.35	-0.660375	7.03649e-06	5.15264	1621.63	2095.73	2125.17	2996.33	3215.65
FBgn0002622	RpS3	protein_coding	Ribosomal protein S3 [Source:FlyBase gene name;Acc:FBgn0002622]	16710.8	-0.658606	4.85669e-12	11.3137	15189.2	13068.8	14495.5	22789.2	22400.4
FBgn0034318	CG14500	protein_coding		3785.63	-0.656964	3.15902e-07	6.50045	3591.74	3194.96	3796.88	5420.57	5793.98
FBgn0039737	CG7920	protein_coding		6781.09	-0.656825	1.20567e-06	5.91877	5035.02	5842.7	6213.74	9407.64	8702.93
FBgn0029870	Marf	protein_coding	Mitochondrial assembly regulatory factor [Source:FlyBase gene name;Acc:FBgn0029870]	3028.53	-0.656685	1.00733e-05	4.99683	3101.5	2464.38	2361.3	4347.63	4065.04
FBgn0000100	RpLP0	protein_coding	Ribosomal protein LP0 [Source:FlyBase gene name;Acc:FBgn0000100]	17542.7	-0.656536	4.74666e-12	11.3236	15548.6	13508.5	14363.1	23448.9	22369.2
FBgn0014869	Pglym78	protein_coding	Phosphoglyceromutase [Source:FlyBase gene name;Acc:FBgn0014869]	1838.65	-0.655068	1.55358e-07	6.80867	1323.46	1192.35	1197.81	1993.53	1926.48
FBgn0014031	Spat	protein_coding	Serine pyruvate aminotransferase [Source:FlyBase gene name;Acc:FBgn0014031]	524.622	-0.654283	0.000162938	3.78798	364.936	383.049	384.018	657.57	543.738
FBgn0037942	CG14721	protein_coding		233.011	-0.653479	0.000208418	3.68106	172.864	156.484	161.778	265.22	255.755
FBgn0004867	RpS2	protein_coding	Ribosomal protein S2 [Source:FlyBase gene name;Acc:FBgn0004867]	17306.5	-0.652562	4.73248e-10	9.32491	15470.9	12842.2	14591.9	22932.8	22259
FBgn0039519	Cyp6a18	protein_coding	Cyp6a18 [Source:FlyBase gene name;Acc:FBgn0039519]	1932.49	-0.651221	0.000739098	3.1313	2109.13	2177.33	1746.87	3492.79	2942.22
FBgn0025286	RpL31	protein_coding	Ribosomal protein L31 [Source:FlyBase gene name;Acc:FBgn0025286]	8556.3	-0.650904	1.77426e-07	6.75098	7529.2	5968.46	6716.23	10572.6	10724
FBgn0033739	Dyb	protein_coding	Dystrobrevin-like [Source:FlyBase gene name;Acc:FBgn0033739]	453.034	-0.65077	0.00101429	2.99384	485.666	357.129	353.787	665.242	608.197
FBgn0261608	RpL37A	protein_coding	Ribosomal protein L37A [Source:FlyBase gene name;Acc:FBgn0261608]	8738.64	-0.64808	1.16573e-06	5.9334	7622.49	5917.58	7052.04	10913.5	10764.6
FBgn0010905	Spn	protein_coding	Spinophilin [Source:FlyBase gene name;Acc:FBgn0010905]	2125.49	-0.647307	1.23915e-07	6.90687	1657.3	2013.17	1913.55	3048.93	2820.58
FBgn0030890	CG7536	protein_coding		1209.61	-0.646155	1.46817e-06	5.83322	1169.81	1125.15	1091.59	1880.65	1682.16
FBgn0262562	CG43102	protein_coding		701.921	-0.646134	0.00023898	3.62164	638.409	612.495	500.041	850.457	998.067
FBgn0260003	Dys	protein_coding	Dystrophin [Source:FlyBase gene name;Acc:FBgn0260003]	3169	-0.645848	4.18364e-07	6.37845	3097.84	2664.06	2527.98	4427.64	4281.29
FBgn0038829	CG17271	protein_coding		1114.48	-0.645179	1.51826e-10	9.81865	816.761	834.26	847.291	1311.85	1303.72
FBgn0027835	Dp1	protein_coding	Dodeca-satellite-binding protein 1 [Source:FlyBase gene name;Acc:FBgn0027835]	7612.94	-0.645091	0.000123941	3.90679	5126.48	6878.56	6094.45	9727.65	9351.68
FBgn0023526	CG2865	protein_coding		503.765	-0.644196	0.00012454	3.90469	400.606	477.131	426.505	648.802	725.678
FBgn0032242	CG5355	protein_coding		1743.97	-0.643782	9.56145e-08	7.01948	1145.11	1368.03	1348.97	2042.85	2002.37
FBgn0030731	Mfe2	protein_coding	peroxisomal Multifunctional enzyme type 2 [Source:FlyBase gene name;Acc:FBgn0030731]	5272.03	-0.643678	6.97805e-08	7.15627	3917.34	4167.46	4033.01	6540.63	6152.66
FBgn0266756	btsz	protein_coding	bitesize [Source:FlyBase gene name;Acc:FBgn0266756]	1714.95	-0.643665	7.47861e-06	5.12618	1510.05	1559.08	1402.07	2377.12	2320.5
FBgn0030828	CG5162	protein_coding		616.379	-0.64307	4.65971e-06	5.33164	400.606	410.89	361.14	633.459	594.681
FBgn0035232	CG12099	protein_coding		1777.27	-0.642908	8.00092e-08	7.09686	1696.63	1605.16	1636.57	2740.97	2434.87
FBgn0003517	sta	protein_coding	stubarista [Source:FlyBase gene name;Acc:FBgn0003517]	24486.3	-0.642839	9.83711e-09	8.00713	23058.6	18734.8	20815.4	33761.8	31791.5
FBgn0260942	bond	protein_coding	james bond [Source:FlyBase gene name;Acc:FBgn0260942]	421.157	-0.642483	4.12809e-05	4.38425	410.667	428.17	428.956	665.242	669.536
FBgn0053966	CG33966	protein_coding		805.125	-0.641838	0.000124328	3.90543	671.336	536.653	605.441	929.366	977.273
FBgn0001250	if	protein_coding	inflated [Source:FlyBase gene name;Acc:FBgn0001250]	484.729	-0.640471	2.86019e-05	4.54361	364.936	424.33	363.592	589.621	618.593
FBgn0005593	RpL7	protein_coding	Ribosomal protein L7 [Source:FlyBase gene name;Acc:FBgn0005593]	14673.8	-0.639587	8.64266e-11	10.0634	13019.7	11429.1	12009.1	19890.4	18137.8
FBgn0036623	CG4729	protein_coding		2654	-0.637961	5.1607e-05	4.28729	1738.7	2323.26	2134.16	3228.67	3262.43
FBgn0003159	ptr	protein_coding	proximal to raf [Source:FlyBase gene name;Acc:FBgn0003159]	2895.63	-0.637564	4.74431e-08	7.32383	2891.13	2667.9	2560.67	4272.01	4202.28
FBgn0026570	CG5704	protein_coding		569.467	-0.636329	1.17913e-05	4.92844	551.52	599.054	598.905	934.845	898.26
FBgn0030662	CG9220	protein_coding		371.078	-0.635675	0.000270453	3.56791	359.448	294.727	326.824	507.425	521.906
FBgn0250815	Jon65Aiv	protein_coding	Jonah 65Aiv [Source:FlyBase gene name;Acc:FBgn0250815]	320847	-0.635001	0.00129374	2.88815	200756	289461	314860	424195	422473
FBgn0027535	botv	protein_coding	brother of tout-velu [Source:FlyBase gene name;Acc:FBgn0027535]	403.93	-0.634468	0.000115078	3.93901	377.741	328.328	294.142	542.495	503.192
FBgn0266084	Fhos	protein_coding	Formin homology 2 domain containing ortholog [Source:FlyBase gene name;Acc:FBgn0266084]	1007.31	-0.634177	7.88402e-09	8.10325	975.906	1104.99	1018.06	1631.87	1593.79
FBgn0031693	Cyp4ac1	protein_coding	Cyp4ac1 [Source:FlyBase gene name;Acc:FBgn0031693]	745.901	-0.634054	0.000648896	3.18782	657.616	503.052	445.298	896.487	783.898
FBgn0031681	pgant5	protein_coding	polypeptide GalNAc transferase 5 [Source:FlyBase gene name;Acc:FBgn0031681]	883.95	-0.633822	9.07194e-06	5.0423	833.224	840.98	705.94	1276.78	1206
FBgn0051635	CG31635	protein_coding		1011.29	-0.633089	0.000159721	3.79664	973.162	777.619	702.672	1300.89	1263.18
FBgn0026872	CG14777	protein_coding		632.58	-0.632452	9.00438e-05	4.04555	436.277	441.611	491.053	771.549	657.06
FBgn0038771	CG4390	protein_coding		825.358	-0.630505	7.75567e-07	6.11038	708.835	643.215	647.111	1066.36	1010.54
FBgn0027291	l(1)G0156	protein_coding	lethal (1) G0156 [Source:FlyBase gene name;Acc:FBgn0027291]	3573.16	-0.630332	1.57993e-11	10.8014	2827.11	2869.51	2943.05	4499.97	4447.63
FBgn0004403	RpS14a	protein_coding	Ribosomal protein S14a [Source:FlyBase gene name;Acc:FBgn0004403]	5222.68	-0.629326	1.70215e-11	10.769	4436.85	4026.34	4323.88	6884.76	6352.28
FBgn0033624	CG12384	protein_coding		1905.46	-0.629025	2.50459e-08	7.60126	1689.31	1409.31	1520.55	2377.12	2409.91
FBgn0061492	loj	protein_coding	logjam [Source:FlyBase gene name;Acc:FBgn0061492]	568.457	-0.62751	2.25775e-05	4.64632	426.216	460.811	512.297	689.353	765.184
FBgn0015756	RpL9	protein_coding	Ribosomal protein L9 [Source:FlyBase gene name;Acc:FBgn0015756]	13321.7	-0.627308	7.19738e-10	9.14283	12105.1	10342.3	11170.8	17497.9	17280.1
FBgn0030519	CG11151	protein_coding		5197.49	-0.626247	2.53662e-07	6.59574	4024.35	4390.19	4546.94	6696.26	6725.51
FBgn0003396	shn	protein_coding	schnurri [Source:FlyBase gene name;Acc:FBgn0003396]	1651.72	-0.625704	0.000340591	3.46777	1564.01	1468.84	1285.24	2301.5	2195.75
FBgn0040349	CG3699	protein_coding		1008.06	-0.624349	0.00043911	3.35743	744.506	561.613	558.052	887.72	1044.85
FBgn0022764	Sin3A	protein_coding	Sin3A [Source:FlyBase gene name;Acc:FBgn0022764]	1950.24	-0.623809	0.000228482	3.64115	2204.25	1578.28	1567.94	2882.35	2680.22
FBgn0051343	CG31343	protein_coding		47452.3	-0.623545	4.82826e-08	7.31621	40593.8	48198.9	49020.3	70848.8	71596.7
FBgn0033465	Etf-QO	protein_coding	Electron transfer flavoprotein-ubiquinone oxidoreductase [Source:FlyBase gene name;Acc:FBgn0033465]	1655.44	-0.622922	7.81879e-07	6.10686	1537.49	1484.2	1381.65	2337.66	2213.42
FBgn0039537	CG5590	protein_coding		1603.96	-0.622676	7.28346e-08	7.13766	1388.4	1368.99	1497.67	2236.83	2157.28
FBgn0051548	CG31548	protein_coding		765.039	-0.620223	1.48124e-07	6.82937	619.202	633.615	623.417	988.547	945.044
FBgn0038135	CG8773	protein_coding		21390.6	-0.619384	0.000432957	3.36356	16324.2	24092.7	22724.1	33128.4	32490.2
FBgn0262736	Vha16-1	protein_coding	Vacuolar H[+] ATPase 16kD subunit 1 [Source:FlyBase gene name;Acc:FBgn0262736]	50381.5	-0.61896	1.35382e-13	12.8684	38144.5	37373.7	36737.5	57494.6	57730.9
FBgn0035611	CG13285	protein_coding		252.989	-0.617481	0.000589927	3.2292	187.498	171.844	171.583	255.356	293.182
FBgn0032518	RpL24	protein_coding	Ribosomal protein L24 [Source:FlyBase gene name;Acc:FBgn0032518]	10011.6	-0.613445	5.24718e-07	6.28007	9028.27	7131.05	7977.77	12687.8	12078.7
FBgn0053181	CG33181	protein_coding		4352.32	-0.610502	6.22209e-05	4.20606	3148.14	4020.58	4132.69	5561.95	6048.7
FBgn0027610	Dic1	protein_coding	Dicarboxylate carrier 1 [Source:FlyBase gene name;Acc:FBgn0027610]	2027.2	-0.609897	2.15324e-06	5.66691	1779.86	1651.24	1540.97	2528.36	2562.74
FBgn0032614	CG13284	protein_coding		1667.47	-0.60979	0.00118256	2.92718	1017.06	1499.56	1402.89	2004.49	2035.64
FBgn0266375	IP3K2	protein_coding	Inositol 1,4,5-triphosphate kinase 2 [Source:FlyBase gene name;Acc:FBgn0266375]	524.396	-0.608306	6.3141e-05	4.19969	516.764	460.811	458.371	749.63	723.598
FBgn0037445	CG9727	protein_coding		894.324	-0.608011	7.76186e-06	5.11003	918.285	795.859	755.78	1281.17	1247.58
FBgn0020618	Rack1	protein_coding	Receptor of activated protein kinase C 1 [Source:FlyBase gene name;Acc:FBgn0020618]	20680	-0.607098	3.02655e-09	8.51905	19389.2	16270.5	17763.7	27828.4	26668.1
FBgn0261602	RpL8	protein_coding	Ribosomal protein L8 [Source:FlyBase gene name;Acc:FBgn0261602]	17466.2	-0.606757	9.96255e-09	8.00163	16335.2	13794.6	15417.1	23921.3	22549
FBgn0035146	CG13893	protein_coding		1182.67	-0.606636	4.59224e-07	6.33798	1200.9	1031.06	1031.13	1669.13	1663.44
FBgn0037140	CG7442	protein_coding		425.23	-0.606379	0.00108888	2.96302	452.74	451.211	482.065	680.585	750.629
FBgn0037485	CG14606	protein_coding		1229.24	-0.606015	0.000616557	3.21003	968.589	959.063	870.169	1490.49	1377.54
FBgn0030237	CG15209	protein_coding		1515.1	-0.605958	3.61598e-05	4.44177	1138.71	1432.35	1436.39	2111.9	1990.93
FBgn0034093	CG15706	protein_coding		1052.1	-0.603488	0.00037485	3.42614	1137.79	848.66	853.828	1485.01	1424.32
FBgn0029801	CG15771	protein_coding		1681.28	-0.603351	0.000195663	3.70849	1853.03	1329.63	1450.28	2336.57	2406.8
FBgn0085313	CG34284	protein_coding		736.642	-0.601151	0.000279857	3.55306	382.314	382.089	338.263	556.743	564.531
FBgn0011672	Mvl	protein_coding	Malvolio [Source:FlyBase gene name;Acc:FBgn0011672]	2909.24	-0.600098	6.80736e-05	4.16702	2081.69	2709.18	2564.75	3777.74	3717.8
FBgn0030679	CG8206	protein_coding		1686.05	-0.597333	4.12388e-07	6.38469	1297.85	1260.51	1388.18	2029.7	1972.22
FBgn0039858	CycG	protein_coding	Cyclin G [Source:FlyBase gene name;Acc:FBgn0039858]	8474.35	-0.596853	6.51283e-07	6.18623	6566.1	7167.53	6394.31	10392.9	10008.7
FBgn0053514	CG33514	protein_coding		1528.07	-0.59664	2.15426e-06	5.6667	1246.64	1203.87	1116.92	1845.58	1770.53
FBgn0064225	RpL5	protein_coding	Ribosomal protein L5 [Source:FlyBase gene name;Acc:FBgn0064225]	27331.2	-0.595799	1.95681e-09	8.70845	25462.3	22930.1	24115.5	37276.6	36098.8
FBgn0035753	RpL18	protein_coding	Ribosomal protein L18 [Source:FlyBase gene name;Acc:FBgn0035753]	10210.4	-0.595468	4.2118e-05	4.37553	10079.2	7398.9	8376.5	13247.8	13010.2
FBgn0037636	CG9821	protein_coding		3047.74	-0.595248	2.47891e-08	7.60574	2694.49	2934.79	2709.37	4270.92	4166.93
